# Supplementary material for: Autophagy-mediated regulation patterns contribute to the alterations of the immune microenvironment in periodontitis
Source: publisher site journal article supplement (doi:10.18632/aging.202165), 2020-12-03
Supplement: Supplementary file [file aging-v13i1-202165-supplementary-material-SD3.pdf]

## SUPPLEMENTARY TABLES

**Supplementary Table 2. Univariate logistic regression results.**

| <b>id</b> | <b>OR</b>   | <b>low95</b> | <b>high95</b> | <b>pvalue</b> | <b>fd</b> |
|-----------|-------------|--------------|---------------|---------------|-----------|
| CXCR4     | 8.95905197  | 5.508081451  | 15.94238744   | 4.21E-16      | 6.73E-15  |
| SERPINA1  | 37.1972771  | 16.01824489  | 97.39303017   | 3.08E-15      | 2.46E-14  |
| BNIP3     | 0.034982189 | 0.0139458    | 0.078698436   | 2.53E-14      | 1.15E-13  |
| PRKCQ     | 43.73270504 | 17.46588255  | 123.4575199   | 2.87E-14      | 1.15E-13  |
| DRAM1     | 40.10742684 | 15.94380918  | 113.0215206   | 1.22E-13      | 3.91E-13  |
| DNAJB9    | 7.128247166 | 4.305372072  | 12.67598588   | 8.17E-13      | 1.87E-12  |
| EDEM1     | 18.06813529 | 8.580894317  | 42.00052636   | 7.36E-13      | 1.87E-12  |
| RAB11A    | 0.034505725 | 0.011671209  | 0.0893268     | 8.25E-11      | 1.32E-10  |
| FOS       | 2.32563562  | 1.831553852  | 3.027552655   | 3.80E-11      | 6.76E-11  |
| CCR2      | 14.73484889 | 6.995711839  | 33.97905752   | 2.14E-11      | 4.29E-11  |
| IL24      | 8.398271685 | 4.5837483    | 16.86532237   | 1.35E-10      | 1.96E-10  |
| PEX3      | 0.099562649 | 0.046212042  | 0.197872389   | 4.53E-10      | 6.05E-10  |
| ERN1      | 9.581845379 | 4.888393721  | 20.59546091   | 6.34E-10      | 7.81E-10  |
| CFLAR     | 5.220795947 | 3.06131357   | 9.363578845   | 6.11E-09      | 6.52E-09  |
| CD46      | 3.479525428 | 2.295185926  | 5.46201312    | 1.47E-08      | 1.47E-08  |
| NCKAP1    | 0.197881267 | 0.112177806  | 0.333252775   | 4.75E-09      | 5.43E-09  |

**Supplementary Table 3. Multivariate logistic regression results.**

| <b>ID</b> | <b>OR</b>   | <b>low95</b> | <b>high95</b> | <b>pvalue</b> |
|-----------|-------------|--------------|---------------|---------------|
| CXCR4     | 1.703476996 | 0.695891318  | 4.405843902   | 0.255737151   |
| SERPINA1  | 0.953392859 | 0.231013398  | 4.122617736   | 0.947745907   |
| BNIP3     | 0.249283753 | 0.070428319  | 0.816072448   | 0.025651892   |
| PRKCQ     | 2.575233452 | 0.5503442    | 12.47583488   | 0.232242842   |
| DRAM1     | 2.065272898 | 0.510172942  | 9.058183167   | 0.319707889   |
| DNAJB9    | 2.21023794  | 0.955796135  | 5.515358496   | 0.075930725   |
| RAB11A    | 0.461663318 | 0.094176447  | 1.986802152   | 0.318746505   |
| FOS       | 1.615067805 | 1.057860578  | 2.544333493   | 0.031683274   |
| IL24      | 1.574290888 | 0.709086092  | 3.688380212   | 0.276347786   |
| PEX3      | 0.395537241 | 0.109585244  | 1.428728845   | 0.154151451   |
