# Supplementary material for: Autophagy-mediated regulation patterns contribute to the alterations of the immune microenvironment in periodontitis
Source: publisher site journal article supplement (doi:10.18632/aging.202165), 2020-12-03
Supplement: Supplementary file [file aging-v13i1-202165-supplementary-material-SD7.pdf]

## SUPPLEMENTARY TABLE

Supplementary Table 8. Diversity of HLA gene expression between healthy and periodontitis samples.

| ID       | control     | treat       | FC          | pvalue      |
|----------|-------------|-------------|-------------|-------------|
| HLA-E    | 9.900019815 | 10.11765558 | 1.021983367 | 2.58E-08    |
| HLA-C    | 11.69971094 | 12.22933332 | 1.045267989 | 1.41E-18    |
| HLA-J    | 9.613263411 | 9.882935586 | 1.028052095 | 1.00E-06    |
| HLA-DQB2 | 7.20374812  | 6.728334111 | 0.934004632 | 7.14E-09    |
| HLA-A    | 11.9206991  | 12.29871027 | 1.031710486 | 1.18E-13    |
| HLA-DMA  | 7.984399658 | 8.792908871 | 1.101261115 | 2.13E-21    |
| HLA-DOB  | 5.742159729 | 6.504613522 | 1.132781711 | 4.02E-23    |
| HLA-DRB1 | 11.09291326 | 11.50098747 | 1.036786929 | 2.46E-12    |
| HLA-B    | 11.56687536 | 12.04355889 | 1.041211088 | 1.12E-12    |
| HLA-DOA  | 5.999200736 | 6.189431203 | 1.031709302 | 0.000198157 |
| HLA-DPB1 | 7.367720578 | 7.646295694 | 1.037810217 | 1.83E-07    |
| HLA-DRA  | 10.54226396 | 11.19533093 | 1.061947507 | 1.09E-14    |
| HLA-DRB6 | 5.370241867 | 5.509055221 | 1.025848622 | 2.16E-06    |
| HLA-F    | 9.349617249 | 9.805435584 | 1.04875262  | 2.67E-13    |
| HLA-G    | 9.848227181 | 10.22515294 | 1.038273463 | 3.07E-11    |
| HLA-DMB  | 7.885631024 | 8.430186322 | 1.069056655 | 1.55E-15    |
| HLA-DPA1 | 9.46803567  | 10.07641674 | 1.064256313 | 9.78E-15    |
