# Supplementary material for: Autophagy-mediated regulation patterns contribute to the alterations of the immune microenvironment in periodontitis
Source: Aging (Albany NY). 2020 Dec 3;13(1):555–77. doi: 10.18632/aging.202165 (PMC7835039; doi:10.18632/aging.202165)
Supplement: Supplementary Table 1 [file aging-13-202165-s002.xlsx]

## Sheet: table s1
Supplementary Table 1. Expression diversity of autophagy regulators
logFC	AveExpr	t	P.Value	adj.P.Val	B
1.76459	8.1567	14.6095	3.24373e-37	6.74695e-35	73.6449
0.678933	5.67234	11.7415	1.26889e-26	1.31964e-24	49.3775
-0.672142	8.34889	-10.8692	1.46849e-23	1.01816e-21	42.371
0.520041	5.99612	10.8095	2.36043e-23	1.22742e-21	41.8998
0.373164	5.6431	10.3748	7.20473e-22	2.99717e-20	38.5075
0.502421	6.66224	9.99533	1.34913e-20	4.67699e-19	35.6019
1.01489	8.64417	9.8836	3.16419e-20	9.40217e-19	34.7569
0.629567	8.68116	9.41403	1.07772e-18	2.80206e-17	31.2616
0.483151	7.71074	9.24318	3.80306e-18	8.78929e-17	30.0131
-0.35503	9.40916	-9.03034	1.79717e-17	3.73811e-16	28.4763
0.44322	7.16104	8.76874	1.17844e-16	2.22833e-15	26.6163
-0.51241	8.72689	-8.6427	2.8831e-16	4.99738e-15	25.7319
1.32551	10.2684	8.62576	3.24946e-16	5.19913e-15	25.6137
-0.44067	8.15084	-8.55808	5.23395e-16	7.77616e-15	25.1426
-0.465784	8.13981	-8.43912	1.20326e-15	1.66852e-14	24.3202
0.276096	7.79909	8.38011	1.81365e-15	2.35774e-14	23.9149
0.536387	4.95316	8.32044	2.74139e-15	3.35417e-14	23.507
0.81054	5.67363	8.08708	1.35529e-14	1.50402e-13	21.9295
-0.35875	7.94155	-8.08508	1.37386e-14	1.50402e-13	21.9161
0.305909	6.03923	7.88641	5.23576e-14	5.44519e-13	20.5965
0.326255	5.92417	7.68496	1.98913e-13	1.89615e-12	19.281
-0.473733	7.35758	-7.68371	2.00554e-13	1.89615e-12	19.2729
-0.531396	6.60345	-7.43552	1.00648e-12	9.10207e-12	17.6845
0.600793	6.26493	7.39516	1.30401e-12	1.13014e-11	17.4296
0.381425	7.52651	7.33348	1.93373e-12	1.60886e-11	17.042
0.385501	7.97116	7.29094	2.53427e-12	2.02741e-11	16.7759
-0.328442	4.83363	-6.97501	1.82598e-11	1.40668e-10	14.8351
0.511241	7.83718	6.95262	2.0954e-11	1.55658e-10	14.7
0.324617	7.66034	6.92824	2.43343e-11	1.74536e-10	14.5531
-0.226285	6.96139	-6.86272	3.63066e-11	2.51726e-10	14.1604
0.569297	8.4902	6.84809	3.96856e-11	2.66277e-10	14.0731
-0.518645	7.55064	-6.81802	4.76275e-11	3.09579e-10	13.8941
-0.241191	8.47266	-6.73592	7.8156e-11	4.9262e-10	13.4082
0.295122	7.38287	6.64881	1.31568e-10	8.04885e-10	12.8976
0.222442	3.83789	6.5929	1.83325e-10	1.08948e-09	12.5725
-0.347284	9.80252	-6.32839	8.56949e-10	4.95126e-09	11.0627
0.270395	8.91838	6.09632	3.19168e-09	1.79424e-08	9.77754
0.288372	7.38279	6.0532	4.05885e-09	2.22168e-08	9.54287
0.276265	7.6692	5.89609	9.6382e-09	5.14037e-08	8.69918
-0.395817	7.87711	-5.82403	1.42497e-08	7.40985e-08	8.3181
0.235405	10.8695	5.79572	1.65986e-08	8.42074e-08	8.16946
0.304697	10.3774	5.70143	2.74835e-08	1.36109e-07	7.67848
0.246287	9.28125	5.51247	7.40751e-08	3.58317e-07	6.7144
0.228911	6.63831	5.49082	8.28514e-08	3.91661e-07	6.60564
-0.232388	5.89076	-5.45538	9.94452e-08	4.59658e-07	6.42837
-0.229624	4.94177	-5.3843	1.43025e-07	6.46722e-07	6.07568
-0.24801	7.5551	-5.36796	1.55404e-07	6.87746e-07	5.99516
-0.218681	8.96775	-5.28452	2.36739e-07	1.02587e-06	5.58707
0.275375	8.70393	5.20647	3.49338e-07	1.4829e-06	5.21021
0.399457	7.48593	5.20201	3.5714e-07	1.4857e-06	5.18882
0.269925	11.5517	5.17131	4.15643e-07	1.69517e-06	5.04199
0.480371	9.15126	5.14912	4.63602e-07	1.85441e-06	4.93633
0.288357	7.48558	5.11923	5.3677e-07	2.10657e-06	4.79458
0.190973	6.77199	4.99115	9.98147e-07	3.84472e-06	4.19514
0.324359	9.43472	4.95287	1.19861e-06	4.53291e-06	4.01849
0.426769	5.47365	4.91579	1.42956e-06	5.30979e-06	3.84849
-0.265663	8.29034	-4.885	1.65354e-06	6.03396e-06	3.70814
-0.162356	6.10769	-4.84208	2.02295e-06	7.2547e-06	3.5138
0.169797	6.27527	4.80956	2.35473e-06	8.30143e-06	3.36751
0.270645	7.4464	4.75592	3.01959e-06	1.04679e-05	3.12811
-0.204194	5.56735	-4.74891	3.11888e-06	1.06349e-05	3.09698
0.234087	8.99982	4.74135	3.2294e-06	1.08341e-05	3.06348
0.267858	8.33996	4.71007	3.72829e-06	1.23093e-05	2.92531
-0.314024	5.47455	-4.70477	3.81993e-06	1.24148e-05	2.90196
-0.22883	8.3438	-4.6207	5.5972e-06	1.7911e-05	2.53489
0.161161	6.13778	4.60221	6.08314e-06	1.91318e-05	2.45496
-0.200997	3.24536	-4.59933	6.16265e-06	1.91318e-05	2.4425
-0.180703	8.9304	-4.57174	6.97416e-06	2.13327e-05	2.32379
0.249727	6.74806	4.50318	9.46005e-06	2.85173e-05	2.03148
0.314275	9.91884	4.48256	1.03611e-05	3.05509e-05	1.94431
0.187142	5.20344	4.48109	1.04284e-05	3.05509e-05	1.93811
-0.207876	6.44899	-4.4193	1.3668e-05	3.94853e-05	1.67913
-0.207261	6.43657	-4.3868	1.57391e-05	4.48458e-05	1.54418
0.310347	6.27883	4.33014	2.00878e-05	5.64629e-05	1.31103
-0.210341	7.5046	-4.3223	2.07732e-05	5.75785e-05	1.27898
-0.14083	4.61884	-4.31934	2.10383e-05	5.75785e-05	1.26688
-0.16228	9.55098	-4.30159	2.26938e-05	6.13027e-05	1.19455
0.265707	6.00957	4.27319	2.56046e-05	6.8279e-05	1.07938
-0.176505	8.85668	-4.09346	5.41426e-05	0.000142553	0.366288
0.209357	4.41019	4.08182	5.67829e-05	0.000147636	0.321045
-0.134928	6.92961	-4.07844	5.7572e-05	0.000147839	0.307933
0.404918	8.14779	3.93566	0.000102276	0.000259432	-0.237074
0.204152	9.61481	3.904	0.000115915	0.000290485	-0.35554
0.229493	7.12388	3.87579	0.000129501	0.000320333	-0.460353
-0.183474	6.81669	-3.87304	0.000130905	0.000320333	-0.470546
0.29286	7.65852	3.84935	0.000143596	0.000347301	-0.55798
-0.156138	7.35519	-3.78872	0.00018159	0.000434147	-0.779554
0.343677	6.68369	3.76321	0.000200263	0.000473349	-0.871826
0.248856	5.21887	3.7103	0.000244917	0.000572391	-1.06138
0.116285	7.17209	3.69135	0.000263079	0.000600906	-1.12867
-0.231984	8.03239	-3.69019	0.000264223	0.000600906	-1.13275
0.239223	10.0642	3.68863	0.000265785	0.000600906	-1.13829
0.266381	9.44586	3.68266	0.000271823	0.000607949	-1.15941
-0.159467	6.71121	-3.5962	0.000375077	0.000829958	-1.46173
-0.16136	6.55276	-3.5884	0.000386019	0.000845179	-1.48869
0.266103	7.10551	3.56095	0.000426938	0.000925033	-1.5831
-0.219871	7.88015	-3.47527	0.000582392	0.00124884	-1.87351
-0.241054	9.62793	-3.44056	0.000659325	0.00139938	-1.98931
-0.102421	4.59833	-3.37625	0.000827498	0.00173858	-2.20097
-0.148436	6.59581	-3.36715	0.00085429	0.00177692	-2.23062
0.161893	6.59523	3.3394	0.000941063	0.00193803	-2.32057
-0.14086	6.6616	-3.1915	0.00155906	0.00315459	-2.78831
0.273455	8.91203	3.19092	0.00156213	0.00315459	-2.79013
-0.286899	7.03954	-3.16729	0.00169044	0.00338088	-2.86301
-0.219611	8.52154	-3.16051	0.00172899	0.00342505	-2.88381
0.194873	5.22444	3.15602	0.00175502	0.00344382	-2.8976
-0.179147	6.4499	-3.14926	0.00179481	0.00348899	-2.91827
0.184189	10.8714	3.14084	0.00184558	0.00355445	-2.94398
-0.108218	5.63443	-3.11008	0.00204251	0.00389763	-3.03736
-0.303936	4.99674	-3.0793	0.00225878	0.00427114	-3.12992
0.132811	6.60503	3.06668	0.00235336	0.0044099	-3.16761
-0.311561	8.31582	-3.00298	0.00288908	0.00536544	-3.3557
0.241449	10.5223	2.98287	0.00308013	0.00566962	-3.4143
-0.0711075	3.67517	-2.91477	0.00381628	0.00696304	-3.60999
0.157787	8.284	2.84421	0.00474532	0.00858283	-3.80821
0.177527	7.03874	2.8096	0.00527256	0.00945425	-3.90377
0.0785468	6.54194	2.74072	0.00648259	0.0115246	-4.0906
-0.114169	7.49753	-2.70792	0.00714286	0.0125908	-4.17803
-0.101065	5.80369	-2.62498	0.00909079	0.0158898	-4.3946
0.0732302	8.05582	2.58744	0.0101197	0.0175408	-4.4905
0.123441	7.62567	2.56705	0.0107214	0.0184302	-4.54205
-0.133226	9.94773	-2.55154	0.0112	0.019095	-4.58098
0.146104	6.60504	2.46632	0.0141864	0.0239901	-4.79089
-0.110984	6.56623	-2.4112	0.0164761	0.0276373	-4.92303
-0.0986563	6.18108	-2.38928	0.0174731	0.0290753	-4.97475
0.126753	8.92813	2.38043	0.0178909	0.0295341	-4.99553
-0.121487	5.75563	-2.37122	0.0183346	0.0300283	-5.01705
-0.0554295	3.45672	-2.35005	0.0193916	0.0315113	-5.06622
-0.124068	9.40557	-2.27979	0.0232926	0.037557	-5.22637
0.106776	6.85585	2.27343	0.0236778	0.0378845	-5.24065
0.109721	6.99501	2.24287	0.0256049	0.0406551	-5.30865
-0.123039	8.43944	-2.23138	0.0263643	0.0415438	-5.334
-0.0701567	6.65819	-2.20988	0.0278369	0.0435344	-5.38106
0.112994	11.9676	2.20022	0.0285219	0.0442728	-5.40208
0.0515087	4.02559	2.17336	0.0305026	0.0469965	-5.46001
0.0982336	8.73743	2.15547	0.0318873	0.0487688	-5.49823
-0.136403	10.0154	-2.13683	0.0333868	0.0506894	-5.53771
0.102141	8.58498	2.05137	0.0410635	0.0618928	-5.71448
-0.111333	6.09858	-2.01348	0.0449195	0.066982	-5.79059
-0.064778	4.04974	-2.01193	0.045084	0.066982	-5.79368
-0.0790873	5.59331	-2.00004	0.0463602	0.0683895	-5.81727
-0.089758	5.81897	-1.92003	0.0557629	0.0816809	-5.97243
0.106243	6.99418	1.90329	0.05792	0.0842472	-6.0041
-0.129216	10.6183	-1.87247	0.0620746	0.0896486	-6.06173
-0.13467	6.84231	-1.86944	0.0624954	0.0896486	-6.06734
0.0752413	5.62112	1.83859	0.0669228	0.0953421	-6.124
0.0806227	7.16049	1.76432	0.0786534	0.111292	-6.25663
0.0873376	8.03991	1.75572	0.0801154	0.112595	-6.27165
0.0987304	8.15188	1.74755	0.0815227	0.113803	-6.28583
0.0878814	6.92086	1.71192	0.0879027	0.121892	-6.34698
0.151206	6.10683	1.66906	0.0961055	0.132384	-6.41889
0.0798876	8.37597	1.6427	0.10145	0.138826	-6.46223
-0.0791711	7.02931	-1.5992	0.110785	0.150328	-6.53225
0.0856806	8.55449	1.59688	0.111301	0.150328	-6.53593
-0.0554289	8.09067	-1.54059	0.124428	0.166974	-6.62369
-0.0573447	6.40726	-1.51349	0.131163	0.174884	-6.66482
-0.0944962	9.97018	-1.4583	0.14576	0.193109	-6.74639
-0.0287299	3.33056	-1.32431	0.186366	0.245342	-6.93195
-0.0992178	9.13395	-1.31274	0.190233	0.247426	-6.94715
0.0693384	6.586	1.31246	0.190327	0.247426	-6.94751
-0.0796559	6.88709	-1.30328	0.193437	0.249906	-6.95947
0.129995	10.2235	1.29297	0.196975	0.252907	-6.97281
-0.0761936	6.37469	-1.27297	0.203975	0.260287	-6.99837
-0.0306751	5.53655	-1.25941	0.20882	0.264845	-7.01548
0.0706186	6.16014	1.22991	0.219653	0.276896	-7.05207
0.0346684	3.65136	1.22392	0.221903	0.278047	-7.0594
-0.0300088	5.13285	-1.18886	0.235398	0.29319	-7.10157
0.0420861	5.31172	1.15911	0.247293	0.306172	-7.13638
-0.0523516	7.02625	-1.15374	0.249486	0.30706	-7.14258
-0.0398384	7.65644	-1.11845	0.264233	0.323297	-7.18258
0.0398746	7.76377	1.08129	0.2804	0.341071	-7.22335
0.0419245	6.5408	1.07755	0.282063	0.3411	-7.22738
-0.100485	6.80598	-1.05511	0.292188	0.351301	-7.25126
-0.0461178	8.3581	-1.04261	0.297935	0.356152	-7.26435
-0.0504322	7.78058	-1.00682	0.314798	0.37416	-7.30095
-0.030248	6.23525	-0.935748	0.350125	0.413784	-7.36988
0.0288125	6.27128	0.931381	0.352374	0.41409	-7.37396
-0.0370787	4.69177	-0.906277	0.365487	0.427086	-7.397
0.0590817	12.6908	0.833435	0.405235	0.470888	-7.4603
-0.0399744	7.51764	-0.826597	0.409095	0.472359	-7.46598
0.0390758	6.92076	0.823161	0.411043	0.472359	-7.46881
0.0296739	6.96814	0.810421	0.418314	0.478073	-7.47921
-0.0395749	8.61075	-0.793567	0.428049	0.485342	-7.49272
-0.0264837	7.67301	-0.791347	0.429341	0.485342	-7.49448
0.032584	9.9111	0.76789	0.443131	0.498223	-7.51276
0.0423985	7.19375	0.761089	0.447177	0.500069	-7.51796
0.024872	6.74365	0.728048	0.467129	0.519587	-7.54255
-0.0343247	8.1947	-0.669713	0.503535	0.557102	-7.58332
0.0214315	8.30302	0.632828	0.527308	0.574767	-7.60735
0.0128209	2.92497	0.630802	0.52863	0.574767	-7.60863
0.0288139	5.0486	0.62901	0.529801	0.574767	-7.60976
0.0694905	10.4487	0.627859	0.530554	0.574767	-7.61048
-0.0283553	5.83778	-0.610443	0.542011	0.584136	-7.62127
0.0124701	3.24559	0.599628	0.549188	0.58882	-7.62782
0.0234647	7.41602	0.526054	0.599223	0.639171	-7.66925
0.030105	6.21174	0.478264	0.632796	0.671539	-7.69326
-0.0277866	8.46397	-0.464628	0.642521	0.678397	-7.6997
-0.0241364	5.48712	-0.408369	0.683282	0.717791	-7.72428
0.0181287	4.44669	0.330009	0.741614	0.775154	-7.75324
0.0107266	4.15042	0.261617	0.793789	0.82554	-7.7735
-0.0256288	6.75238	-0.24867	0.803779	0.831771	-7.77681
-0.015136	6.55499	-0.209187	0.834438	0.859223	-7.78586
-0.00915677	6.46489	-0.188676	0.850469	0.871417	-7.78994
0.0131712	9.41508	0.165262	0.868845	0.885881	-7.79409
-0.00391027	7.01612	-0.153139	0.878387	0.891242	-7.79603
-0.00473298	5.76933	-0.145954	0.884052	0.892635	-7.7971
0.00275078	4.51332	0.0700858	0.94417	0.948731	-7.80531
-0.000330113	9.00884	-0.00707168	0.994362	0.994362	-7.80775
