# Supplementary material for: Autophagy-mediated regulation patterns contribute to the alterations of the immune microenvironment in periodontitis
Source: Aging (Albany NY). 2020 Dec 3;13(1):555–77. doi: 10.18632/aging.202165 (PMC7835039; doi:10.18632/aging.202165)
Supplement: Supplementary Table 4 [file aging-13-202165-s004.xlsx]

## Sheet: table s4
Supplementary Table 4. Correlations between autophagy regulators and immunocytes
gene	immunocyte	cor	pvalue	fdr	abscor	logp
CXCR4	Activated_B_cell	0.798	1.38188e-69	1.27133e-67	0.798	-222.223
CXCR4	Activated_CD4_T_cell	0.677	6.6212e-43	7.38365e-42	0.677	-136.637
CXCR4	Activated_CD8_T_cell	0.666	4.19233e-41	4.53759e-40	0.666	-130.695
CXCR4	Activated_dendritic_cell	0.625	4.95477e-35	3.79866e-34	0.625	-111.02
CXCR4	CD56bright_natural_killer_cell	0.161	0.00460542	0.0055205	0.161	-7.50099
CXCR4	Eosinophil	0.693	1.3291e-45	2.03795e-44	0.693	-145.138
CXCR4	Gamma_delta_T_cell	0.507	1.3023e-21	3.86489e-21	0.507	-67.8101
CXCR4	Immature_B_cell	0.773	6.26371e-63	3.84174e-61	0.773	-200.696
CXCR4	Immature_dendritic_cell	0.376	7.43212e-12	1.40257e-11	0.376	-36.0531
CXCR4	Macrophage	0.684	3.86061e-44	4.58291e-43	0.684	-140.647
CXCR4	Mast_cell	0.306	3.77399e-08	5.811e-08	0.306	-24.0366
CXCR4	MDSC	0.826	1.30683e-78	4.80913e-76	0.826	-250.201
CXCR4	Monocyte	0.456	2.75944e-17	6.72499e-17	0.456	-53.7232
CXCR4	Natural_killer_cell	0.587	4.26321e-30	2.14912e-29	0.587	-95.2322
CXCR4	Natural_killer_T_cell	0.726	4.10667e-52	1.07947e-50	0.726	-165.986
CXCR4	Neutrophil	0.232	3.75051e-05	4.9117e-05	0.232	-14.3134
CXCR4	Plasmacytoid_dendritic_cell	0.685	2.86727e-44	3.63846e-43	0.685	-140.98
CXCR4	Regulatory_T_cell	0.74	4.29937e-55	1.43833e-53	0.74	-175.538
CXCR4	T_follicular_helper_cell	0.695	4.10648e-46	6.57036e-45	0.695	-146.771
CXCR4	Type_1_T_helper_cell	0.81	2.5683e-73	3.15045e-71	0.81	-234.201
CXCR4	Type_17_T_helper_cell	0.265	2.16225e-06	3.0487e-06	0.265	-18.3234
SERPINA1	Activated_B_cell	0.657	1.11507e-39	1.05217e-38	0.657	-126.16
SERPINA1	Activated_CD4_T_cell	0.444	1.96202e-16	4.48461e-16	0.444	-50.9859
SERPINA1	Activated_CD8_T_cell	0.591	1.47772e-30	7.65916e-30	0.591	-96.7207
SERPINA1	Activated_dendritic_cell	0.822	1.96163e-77	3.6094e-75	0.822	-247.293
SERPINA1	CD56dim_natural_killer_cell	0.347	3.16053e-10	5.46044e-10	0.347	-30.7703
SERPINA1	Eosinophil	0.42	1.15828e-14	2.43569e-14	0.42	-45.2227
SERPINA1	Gamma_delta_T_cell	0.425	4.90259e-15	1.06127e-14	0.425	-46.4212
SERPINA1	Immature_B_cell	0.57	4.10385e-28	1.77673e-27	0.57	-88.8628
SERPINA1	Immature_dendritic_cell	0.45	7.03068e-17	1.69104e-16	0.45	-52.3929
SERPINA1	Macrophage	0.796	3.14477e-69	2.31455e-67	0.796	-221.358
SERPINA1	Mast_cell	0.265	2.31741e-06	3.255e-06	0.265	-18.2289
SERPINA1	MDSC	0.724	1.62999e-51	3.74897e-50	0.724	-164.19
SERPINA1	Monocyte	0.533	3.54268e-24	1.21842e-23	0.533	-76.1193
SERPINA1	Natural_killer_cell	0.536	1.72814e-24	6.11495e-24	0.536	-77.1139
SERPINA1	Natural_killer_T_cell	0.772	1.78224e-62	9.36947e-61	0.772	-199.41
SERPINA1	Neutrophil	0.499	5.97629e-21	1.71818e-20	0.499	-65.6577
SERPINA1	Plasmacytoid_dendritic_cell	0.634	3.24347e-36	2.65244e-35	0.634	-114.86
SERPINA1	Regulatory_T_cell	0.642	1.75344e-37	1.53635e-36	0.642	-118.97
SERPINA1	T_follicular_helper_cell	0.722	2.77345e-51	6.0037e-50	0.722	-163.511
SERPINA1	Type_1_T_helper_cell	0.728	1.63738e-52	4.63506e-51	0.728	-167.206
SERPINA1	Type_17_T_helper_cell	0.411	4.41379e-14	9.07417e-14	0.411	-43.3252
SERPINA1	Type_2_T_helper_cell	-0.279	6.156e-07	8.88395e-07	0.279	-20.1023
BNIP3	Activated_B_cell	-0.556	1.6621e-26	6.43846e-26	0.556	-83.6834
BNIP3	Activated_CD4_T_cell	-0.356	1.03905e-10	1.84721e-10	0.356	-32.3339
BNIP3	Activated_CD8_T_cell	-0.415	2.39338e-14	5.00434e-14	0.415	-44.1838
BNIP3	Activated_dendritic_cell	-0.474	8.48195e-19	2.19814e-18	0.474	-58.6584
BNIP3	CD56dim_natural_killer_cell	-0.152	0.00728581	0.00862115	0.152	-6.8579
BNIP3	Eosinophil	-0.363	4.12619e-11	7.40702e-11	0.363	-33.6523
BNIP3	Gamma_delta_T_cell	-0.184	0.00116652	0.00143571	0.184	-9.44402
BNIP3	Immature_B_cell	-0.486	9.52318e-20	2.59595e-19	0.486	-61.7404
BNIP3	Immature_dendritic_cell	-0.253	6.74329e-06	9.12328e-06	0.253	-16.742
BNIP3	Macrophage	-0.593	8.71555e-31	4.64829e-30	0.593	-97.4411
BNIP3	MDSC	-0.582	1.89556e-29	8.94317e-29	0.582	-93.1751
BNIP3	Monocyte	-0.356	1.08537e-10	1.91109e-10	0.356	-32.2849
BNIP3	Natural_killer_cell	-0.468	2.78747e-18	7.0744e-18	0.468	-56.9721
BNIP3	Natural_killer_T_cell	-0.576	8.98747e-29	4.0832e-28	0.576	-90.9843
BNIP3	Neutrophil	-0.162	0.00420878	0.00506154	0.162	-7.62621
BNIP3	Plasmacytoid_dendritic_cell	-0.386	1.9846e-12	3.84386e-12	0.386	-37.9206
BNIP3	Regulatory_T_cell	-0.445	1.67957e-16	3.91191e-16	0.445	-51.183
BNIP3	T_follicular_helper_cell	-0.389	1.2713e-12	2.47533e-12	0.389	-38.5555
BNIP3	Type_1_T_helper_cell	-0.608	1.05857e-32	6.18342e-32	0.608	-103.673
BNIP3	Type_17_T_helper_cell	-0.292	1.70549e-07	2.51048e-07	0.292	-21.9255
BNIP3	Type_2_T_helper_cell	0.226	5.89561e-05	7.55953e-05	0.226	-13.6913
PRKCQ	Activated_B_cell	0.569	5.91964e-28	2.47548e-27	0.569	-88.3843
PRKCQ	Activated_CD4_T_cell	0.612	3.05129e-33	1.87146e-32	0.612	-105.398
PRKCQ	Activated_CD8_T_cell	0.571	3.16847e-28	1.40482e-27	0.571	-89.2017
PRKCQ	Activated_dendritic_cell	0.405	1.22756e-13	2.50967e-13	0.405	-41.8576
PRKCQ	CD56bright_natural_killer_cell	0.307	3.43137e-08	5.30565e-08	0.307	-24.1679
PRKCQ	CD56dim_natural_killer_cell	0.179	0.00152524	0.00186475	0.179	-9.0668
PRKCQ	Eosinophil	0.428	2.83845e-15	6.25478e-15	0.428	-47.184
PRKCQ	Gamma_delta_T_cell	0.324	5.15918e-09	8.18352e-09	0.324	-26.8646
PRKCQ	Immature_B_cell	0.537	1.31953e-24	4.71445e-24	0.537	-77.4892
PRKCQ	Immature_dendritic_cell	0.395	5.08621e-13	1.01174e-12	0.395	-39.8463
PRKCQ	Macrophage	0.68	1.98499e-43	2.28274e-42	0.68	-138.33
PRKCQ	Mast_cell	0.154	0.00669418	0.00794664	0.154	-6.97544
PRKCQ	MDSC	0.573	2.00815e-28	9.01218e-28	0.573	-89.8421
PRKCQ	Natural_killer_cell	0.338	9.8878e-10	1.65396e-09	0.338	-29.1714
PRKCQ	Natural_killer_T_cell	0.664	9.07371e-41	8.78717e-40	0.664	-129.742
PRKCQ	Neutrophil	0.266	2.03312e-06	2.87764e-06	0.266	-18.4067
PRKCQ	Plasmacytoid_dendritic_cell	0.341	6.8412e-10	1.15485e-09	0.341	-29.6897
PRKCQ	Regulatory_T_cell	0.569	4.80509e-28	2.0325e-27	0.569	-88.6688
PRKCQ	T_follicular_helper_cell	0.568	6.1916e-28	2.56012e-27	0.568	-88.3358
PRKCQ	Type_1_T_helper_cell	0.621	1.87942e-34	1.33005e-33	0.621	-109.212
PRKCQ	Type_17_T_helper_cell	0.374	1.05826e-11	1.97685e-11	0.374	-35.558
DRAM1	Activated_B_cell	0.62	2.84903e-34	1.90626e-33	0.62	-108.693
DRAM1	Activated_CD4_T_cell	0.636	1.64453e-36	1.37543e-35	0.636	-115.808
DRAM1	Activated_CD8_T_cell	0.566	1.11277e-27	4.49999e-27	0.566	-87.5221
DRAM1	Activated_dendritic_cell	0.324	5.07644e-09	8.08714e-09	0.324	-26.8817
DRAM1	CD56bright_natural_killer_cell	0.455	2.9633e-17	7.17429e-17	0.455	-53.6299
DRAM1	CD56dim_natural_killer_cell	-0.154	0.00648856	0.00772748	0.154	-7.01579
DRAM1	Eosinophil	0.588	3.43911e-30	1.75777e-29	0.588	-95.5222
DRAM1	Gamma_delta_T_cell	0.463	6.85498e-18	1.70448e-17	0.463	-55.7034
DRAM1	Immature_B_cell	0.605	2.52194e-32	1.45012e-31	0.605	-102.444
DRAM1	Immature_dendritic_cell	0.35	2.3354e-10	4.0539e-10	0.35	-31.2
DRAM1	Macrophage	0.636	1.54107e-36	1.31887e-35	0.636	-115.868
DRAM1	Mast_cell	0.323	5.86938e-09	9.27009e-09	0.323	-26.6848
DRAM1	MDSC	0.706	5.30279e-48	1.02707e-46	0.706	-152.77
DRAM1	Monocyte	0.263	2.76645e-06	3.85626e-06	0.263	-17.9844
DRAM1	Natural_killer_cell	0.493	2.22429e-20	6.29646e-20	0.493	-63.784
DRAM1	Natural_killer_T_cell	0.527	1.62455e-23	5.48472e-23	0.527	-73.9489
DRAM1	Plasmacytoid_dendritic_cell	0.393	7.10669e-13	1.39854e-12	0.393	-39.3792
DRAM1	Regulatory_T_cell	0.733	1.75642e-53	5.38636e-52	0.733	-170.311
DRAM1	T_follicular_helper_cell	0.519	9.27162e-23	2.94134e-22	0.519	-71.5259
DRAM1	Type_1_T_helper_cell	0.725	9.2628e-52	2.27247e-50	0.725	-164.912
DRAM1	Type_17_T_helper_cell	0.182	0.00128794	0.00157987	0.182	-9.30598
DNAJB9	Activated_B_cell	0.691	2.09874e-45	2.97052e-44	0.691	-144.594
DNAJB9	Activated_CD4_T_cell	0.536	1.82632e-24	6.40082e-24	0.536	-77.048
DNAJB9	Activated_CD8_T_cell	0.415	2.52747e-14	5.25486e-14	0.415	-44.1133
DNAJB9	Activated_dendritic_cell	0.364	3.62142e-11	6.56495e-11	0.364	-33.8264
DNAJB9	CD56dim_natural_killer_cell	-0.163	0.00405322	0.00490653	0.163	-7.67108
DNAJB9	Eosinophil	0.524	2.74382e-23	9.09663e-23	0.524	-73.219
DNAJB9	Gamma_delta_T_cell	0.549	8.5416e-26	3.27428e-25	0.549	-81.337
DNAJB9	Immature_B_cell	0.746	3.04944e-56	1.12219e-54	0.746	-179.218
DNAJB9	Immature_dendritic_cell	0.23	4.50766e-05	5.8504e-05	0.23	-14.0611
DNAJB9	Macrophage	0.492	2.43801e-20	6.84875e-20	0.492	-63.6627
DNAJB9	MDSC	0.622	1.36975e-34	9.8837e-34	0.622	-109.641
DNAJB9	Natural_killer_cell	0.309	2.81283e-08	4.3676e-08	0.309	-24.4486
DNAJB9	Natural_killer_T_cell	0.611	4.20966e-33	2.5396e-32	0.611	-104.957
DNAJB9	Neutrophil	0.208	0.000231372	0.000287652	0.208	-11.7634
DNAJB9	Plasmacytoid_dendritic_cell	0.625	5.84416e-35	4.38908e-34	0.625	-110.812
DNAJB9	Regulatory_T_cell	0.617	6.68915e-34	4.31861e-33	0.617	-107.513
DNAJB9	T_follicular_helper_cell	0.4	2.44879e-13	4.95141e-13	0.4	-40.8772
DNAJB9	Type_1_T_helper_cell	0.579	4.37128e-29	2.03624e-28	0.579	-91.9881
EDEM1	Activated_B_cell	0.769	7.60887e-62	3.50008e-60	0.769	-197.508
EDEM1	Activated_CD4_T_cell	0.514	2.74853e-22	8.49964e-22	0.514	-69.995
EDEM1	Activated_CD8_T_cell	0.447	1.15394e-16	2.72213e-16	0.447	-51.7061
EDEM1	Activated_dendritic_cell	0.399	3.04503e-13	6.12334e-13	0.399	-40.5707
EDEM1	CD56bright_natural_killer_cell	0.162	0.00418884	0.00505408	0.162	-7.62834
EDEM1	CD56dim_natural_killer_cell	-0.225	6.4824e-05	8.28307e-05	0.225	-13.5595
EDEM1	Eosinophil	0.525	2.53546e-23	8.48227e-23	0.525	-73.3199
EDEM1	Gamma_delta_T_cell	0.513	3.26852e-22	9.94063e-22	0.513	-69.7691
EDEM1	Immature_B_cell	0.764	1.71078e-60	6.99519e-59	0.764	-193.187
EDEM1	Immature_dendritic_cell	0.23	4.38368e-05	5.72055e-05	0.23	-14.0935
EDEM1	Macrophage	0.492	2.74419e-20	7.65047e-20	0.492	-63.503
EDEM1	MDSC	0.704	1.29607e-47	2.38476e-46	0.704	-151.555
EDEM1	Monocyte	0.242	1.69571e-05	2.25127e-05	0.242	-15.4389
EDEM1	Natural_killer_cell	0.441	3.73909e-16	8.39015e-16	0.441	-50.0822
EDEM1	Natural_killer_T_cell	0.616	7.89254e-34	5.00768e-33	0.616	-107.299
EDEM1	Neutrophil	0.172	0.00242535	0.00295539	0.172	-8.40244
EDEM1	Plasmacytoid_dendritic_cell	0.582	1.84976e-29	8.84041e-29	0.582	-93.1918
EDEM1	Regulatory_T_cell	0.665	6.2608e-41	6.22696e-40	0.665	-130.239
EDEM1	T_follicular_helper_cell	0.48	2.87638e-19	7.72634e-19	0.48	-60.1668
EDEM1	Type_1_T_helper_cell	0.665	5.9294e-41	6.06117e-40	0.665	-130.278
EDEM1	Type_17_T_helper_cell	0.209	0.000207002	0.000258226	0.209	-11.9191
EDEM1	Type_2_T_helper_cell	-0.196	0.000522847	0.000647837	0.196	-10.5921
RAB11A	Activated_B_cell	-0.616	1.03338e-33	6.44548e-33	0.616	-106.935
RAB11A	Activated_CD4_T_cell	-0.187	0.000948657	0.0011715	0.187	-9.73743
RAB11A	Activated_CD8_T_cell	-0.383	2.79025e-12	5.37598e-12	0.383	-37.4366
RAB11A	Activated_dendritic_cell	-0.711	5.84008e-49	1.19397e-47	0.711	-155.875
RAB11A	CD56dim_natural_killer_cell	-0.159	0.00490989	0.00586636	0.159	-7.41332
RAB11A	Eosinophil	-0.3	7.43392e-08	1.12118e-07	0.3	-23.0885
RAB11A	Gamma_delta_T_cell	-0.332	1.95504e-09	3.16941e-09	0.332	-28.2331
RAB11A	Immature_B_cell	-0.522	4.21177e-23	1.38387e-22	0.522	-72.6137
RAB11A	Immature_dendritic_cell	-0.23	4.51498e-05	5.8504e-05	0.23	-14.0611
RAB11A	Macrophage	-0.548	1.09137e-25	4.14044e-25	0.548	-80.9984
RAB11A	MDSC	-0.633	4.72196e-36	3.77757e-35	0.633	-114.35
RAB11A	Monocyte	-0.645	7.3029e-38	6.5548e-37	0.645	-120.199
RAB11A	Natural_killer_cell	-0.557	1.23466e-26	4.83358e-26	0.557	-84.097
RAB11A	Natural_killer_T_cell	-0.516	1.63326e-22	5.13708e-22	0.516	-70.7215
RAB11A	Neutrophil	-0.254	6.07359e-06	8.30885e-06	0.254	-16.8769
RAB11A	Plasmacytoid_dendritic_cell	-0.602	5.30847e-32	2.95988e-31	0.602	-101.414
RAB11A	Regulatory_T_cell	-0.461	1.07166e-17	2.6468e-17	0.461	-55.0685
RAB11A	T_follicular_helper_cell	-0.535	2.20633e-24	7.6597e-24	0.535	-76.789
RAB11A	Type_1_T_helper_cell	-0.583	1.14971e-29	5.64123e-29	0.583	-93.8399
RAB11A	Type_17_T_helper_cell	-0.255	5.22105e-06	7.1692e-06	0.255	-17.0898
RAB11A	Type_2_T_helper_cell	0.438	5.90683e-16	1.3174e-15	0.438	-49.4312
FOS	Activated_B_cell	0.246	1.22198e-05	1.63524e-05	0.246	-15.9001
FOS	Activated_CD4_T_cell	0.426	4.46071e-15	9.71326e-15	0.426	-46.549
FOS	Activated_CD8_T_cell	0.228	5.07065e-05	6.54736e-05	0.228	-13.8987
FOS	Activated_dendritic_cell	0.259	3.93229e-06	5.46069e-06	0.259	-17.4825
FOS	Eosinophil	0.508	1.03557e-21	3.09829e-21	0.508	-68.129
FOS	Immature_B_cell	0.247	1.09925e-05	1.47636e-05	0.247	-16.0476
FOS	Immature_dendritic_cell	0.286	2.94517e-07	4.30089e-07	0.286	-21.1489
FOS	Macrophage	0.301	6.46695e-08	9.79357e-08	0.301	-23.2836
FOS	Mast_cell	0.367	2.52642e-11	4.64861e-11	0.367	-34.3244
FOS	MDSC	0.325	4.83204e-09	7.73126e-09	0.325	-26.9466
FOS	Monocyte	0.253	6.36963e-06	8.64953e-06	0.253	-16.8189
FOS	Natural_killer_cell	0.284	3.78563e-07	5.50637e-07	0.284	-20.7924
FOS	Natural_killer_T_cell	0.256	5.01244e-06	6.90853e-06	0.256	-17.1432
FOS	Plasmacytoid_dendritic_cell	0.241	1.82394e-05	2.40577e-05	0.241	-15.3431
FOS	Regulatory_T_cell	0.263	2.73955e-06	3.83329e-06	0.263	-17.993
FOS	T_follicular_helper_cell	0.28	5.38277e-07	7.79865e-07	0.28	-20.2903
FOS	Type_1_T_helper_cell	0.369	1.85931e-11	3.43832e-11	0.369	-34.7595
FOS	Type_2_T_helper_cell	0.211	0.000181593	0.000227301	0.211	-12.1031
CCR2	Activated_B_cell	0.62	2.41697e-34	1.6782e-33	0.62	-108.877
CCR2	Activated_CD4_T_cell	0.609	7.6697e-33	4.55234e-32	0.609	-104.115
CCR2	Activated_CD8_T_cell	0.585	7.02058e-30	3.49132e-29	0.585	-94.5321
CCR2	Activated_dendritic_cell	0.306	4.00809e-08	6.14574e-08	0.306	-23.9558
CCR2	CD56bright_natural_killer_cell	0.313	1.8383e-08	2.8787e-08	0.313	-25.05
CCR2	CD56dim_natural_killer_cell	-0.304	4.74764e-08	7.24951e-08	0.304	-23.7175
CCR2	Eosinophil	0.521	5.85172e-23	1.90569e-22	0.521	-72.1521
CCR2	Gamma_delta_T_cell	0.591	1.46448e-30	7.65916e-30	0.591	-96.7207
CCR2	Immature_B_cell	0.69	3.69158e-45	4.85179e-44	0.69	-143.886
CCR2	Immature_dendritic_cell	0.299	8.40724e-08	1.25767e-07	0.299	-22.9227
CCR2	Macrophage	0.52	6.41965e-23	2.07231e-22	0.52	-72.0312
CCR2	Mast_cell	0.268	1.72114e-06	2.45496e-06	0.268	-18.6359
CCR2	MDSC	0.697	2.30301e-46	4.03574e-45	0.697	-147.474
CCR2	Natural_killer_cell	0.345	4.19843e-10	7.18614e-10	0.345	-30.3741
CCR2	Natural_killer_T_cell	0.476	6.42266e-19	1.67627e-18	0.476	-59.0495
CCR2	Plasmacytoid_dendritic_cell	0.467	3.38172e-18	8.52379e-18	0.467	-56.7032
CCR2	Regulatory_T_cell	0.696	3.02923e-46	5.06707e-45	0.696	-147.146
CCR2	T_follicular_helper_cell	0.45	7.12824e-17	1.70337e-16	0.45	-52.3825
CCR2	Type_1_T_helper_cell	0.603	4.48651e-32	2.54005e-31	0.603	-101.635
IL24	Activated_B_cell	0.478	3.98046e-19	1.04629e-18	0.478	-59.7294
IL24	Activated_CD4_T_cell	0.472	1.39347e-18	3.58598e-18	0.472	-57.9523
IL24	Activated_CD8_T_cell	0.268	1.73836e-06	2.46995e-06	0.268	-18.6271
IL24	Activated_dendritic_cell	0.38	4.40991e-12	8.40853e-12	0.38	-36.7913
IL24	CD56bright_natural_killer_cell	0.293	1.48641e-07	2.20565e-07	0.293	-22.1123
IL24	Eosinophil	0.444	1.93668e-16	4.45436e-16	0.444	-50.9956
IL24	Gamma_delta_T_cell	0.448	9.93664e-17	2.35915e-16	0.448	-51.9126
IL24	Immature_B_cell	0.513	3.20991e-22	9.84373e-22	0.513	-69.7832
IL24	Immature_dendritic_cell	0.274	9.79936e-07	1.40866e-06	0.274	-19.4372
IL24	Macrophage	0.619	4.08627e-34	2.68526e-33	0.619	-108.199
IL24	Mast_cell	0.423	6.70927e-15	1.43547e-14	0.423	-45.9855
IL24	MDSC	0.479	3.52986e-19	9.41297e-19	0.479	-59.882
IL24	Natural_killer_cell	0.33	2.76194e-09	4.43841e-09	0.33	-27.7473
IL24	Natural_killer_T_cell	0.601	7.28877e-32	4.00339e-31	0.601	-100.979
IL24	Neutrophil	0.541	5.79142e-25	2.13124e-24	0.541	-78.6346
IL24	Plasmacytoid_dendritic_cell	0.446	1.57686e-16	3.69608e-16	0.446	-51.2649
IL24	Regulatory_T_cell	0.506	1.53165e-21	4.50918e-21	0.506	-67.5876
IL24	T_follicular_helper_cell	0.423	6.5611e-15	1.41198e-14	0.423	-46.0093
IL24	Type_1_T_helper_cell	0.594	6.51425e-31	3.52536e-30	0.594	-97.8401
IL24	Type_17_T_helper_cell	0.483	1.67654e-19	4.53653e-19	0.483	-60.935
PEX3	Activated_B_cell	-0.57	4.52e-28	1.93414e-27	0.57	-88.7404
PEX3	Activated_CD8_T_cell	-0.299	8.33996e-08	1.2527e-07	0.299	-22.9285
PEX3	Activated_dendritic_cell	-0.691	2.24607e-45	3.06131e-44	0.691	-144.551
PEX3	CD56dim_natural_killer_cell	-0.309	2.63664e-08	4.11137e-08	0.309	-24.5358
PEX3	Immature_B_cell	-0.437	7.27306e-16	1.61234e-15	0.437	-49.1398
PEX3	Macrophage	-0.558	9.82723e-27	3.88862e-26	0.558	-84.4109
PEX3	MDSC	-0.568	6.30396e-28	2.57762e-27	0.568	-88.326
PEX3	Monocyte	-0.685	3.22468e-44	3.95561e-43	0.685	-140.859
PEX3	Natural_killer_cell	-0.622	1.20198e-34	8.84655e-34	0.622	-109.8
PEX3	Natural_killer_T_cell	-0.493	2.00578e-20	5.7219e-20	0.493	-63.9221
PEX3	Neutrophil	-0.242	1.70069e-05	2.25127e-05	0.242	-15.4389
PEX3	Plasmacytoid_dendritic_cell	-0.5	5.22037e-21	1.51267e-20	0.5	-65.8415
PEX3	Regulatory_T_cell	-0.344	4.85788e-10	8.23824e-10	0.344	-30.1769
PEX3	T_follicular_helper_cell	-0.541	5.73531e-25	2.13124e-24	0.541	-78.6346
PEX3	Type_1_T_helper_cell	-0.511	4.91224e-22	1.48173e-21	0.511	-69.1932
PEX3	Type_17_T_helper_cell	-0.365	3.13329e-11	5.73657e-11	0.365	-34.021
PEX3	Type_2_T_helper_cell	0.62	2.55156e-34	1.73884e-33	0.62	-108.825
ERN1	Activated_B_cell	0.625	4.73149e-35	3.70466e-34	0.625	-111.056
ERN1	Activated_CD4_T_cell	0.4	2.28725e-13	4.65032e-13	0.4	-40.9677
ERN1	Activated_CD8_T_cell	0.292	1.63191e-07	2.41182e-07	0.292	-21.9834
ERN1	Activated_dendritic_cell	0.287	2.59889e-07	3.81033e-07	0.287	-21.3236
ERN1	CD56dim_natural_killer_cell	-0.344	4.71422e-10	8.03163e-10	0.344	-30.2136
ERN1	Eosinophil	0.458	1.79374e-17	4.40064e-17	0.458	-54.3351
ERN1	Gamma_delta_T_cell	0.422	7.88669e-15	1.67763e-14	0.422	-45.7606
ERN1	Immature_B_cell	0.649	1.93217e-38	1.7776e-37	0.649	-122.081
ERN1	Macrophage	0.356	1.07158e-10	1.89587e-10	0.356	-32.2964
ERN1	Mast_cell	0.164	0.00377856	0.00458915	0.164	-7.76756
ERN1	MDSC	0.583	1.42338e-29	6.89213e-29	0.583	-93.551
ERN1	Monocyte	0.303	5.13606e-08	7.81021e-08	0.303	-23.6101
ERN1	Natural_killer_cell	0.382	3.50299e-12	6.71406e-12	0.382	-37.116
ERN1	Natural_killer_T_cell	0.395	5.15129e-13	1.01918e-12	0.395	-39.8357
ERN1	Plasmacytoid_dendritic_cell	0.502	3.35467e-21	9.79778e-21	0.502	-66.468
ERN1	Regulatory_T_cell	0.538	1.24945e-24	4.50782e-24	0.538	-77.5538
ERN1	T_follicular_helper_cell	0.332	2.16557e-09	3.49531e-09	0.332	-28.0919
ERN1	Type_1_T_helper_cell	0.54	7.01662e-25	2.55655e-24	0.54	-78.3721
CFLAR	Activated_B_cell	0.571	3.47355e-28	1.52175e-27	0.571	-89.0863
CFLAR	Activated_CD4_T_cell	0.334	1.53589e-09	2.51203e-09	0.334	-28.5685
CFLAR	Activated_CD8_T_cell	0.313	1.79058e-08	2.81595e-08	0.313	-25.0818
CFLAR	Activated_dendritic_cell	0.546	1.85396e-25	6.96181e-25	0.546	-80.2487
CFLAR	Eosinophil	0.353	1.50366e-10	2.63498e-10	0.353	-31.8215
CFLAR	Gamma_delta_T_cell	0.413	3.58009e-14	7.40153e-14	0.413	-43.6192
CFLAR	Immature_B_cell	0.577	5.98645e-29	2.75376e-28	0.577	-91.5526
CFLAR	Immature_dendritic_cell	0.258	4.23443e-06	5.85816e-06	0.258	-17.3811
CFLAR	Macrophage	0.392	7.60276e-13	1.4882e-12	0.392	-39.2896
CFLAR	MDSC	0.527	1.60603e-23	5.47241e-23	0.527	-73.9522
CFLAR	Monocyte	0.374	9.34107e-12	1.75383e-11	0.374	-35.7307
CFLAR	Natural_killer_cell	0.444	1.99325e-16	4.52788e-16	0.444	-50.972
CFLAR	Natural_killer_T_cell	0.486	8.43753e-20	2.31717e-19	0.486	-61.9043
CFLAR	Neutrophil	0.216	0.000122893	0.000155411	0.216	-12.6516
CFLAR	Plasmacytoid_dendritic_cell	0.665	5.90188e-41	6.06117e-40	0.665	-130.278
CFLAR	Regulatory_T_cell	0.441	3.67288e-16	8.29216e-16	0.441	-50.0991
CFLAR	T_follicular_helper_cell	0.421	9.31669e-15	1.97043e-14	0.421	-45.5285
CFLAR	Type_1_T_helper_cell	0.515	2.20966e-22	6.89114e-22	0.515	-70.2977
CD46	Activated_B_cell	0.353	1.6787e-10	2.92777e-10	0.353	-31.6695
CD46	Activated_CD4_T_cell	0.427	3.91637e-15	8.57873e-15	0.427	-46.7282
CD46	Activated_CD8_T_cell	0.247	1.08025e-05	1.45616e-05	0.247	-16.0675
CD46	Activated_dendritic_cell	0.364	4.03616e-11	7.28092e-11	0.364	-33.6771
CD46	CD56dim_natural_killer_cell	-0.226	5.83092e-05	7.50273e-05	0.226	-13.7022
CD46	Eosinophil	0.297	1.01734e-07	1.51571e-07	0.297	-22.6535
CD46	Gamma_delta_T_cell	0.245	1.28764e-05	1.71685e-05	0.245	-15.8299
CD46	Immature_B_cell	0.333	1.91873e-09	3.1243e-09	0.333	-28.2538
CD46	Immature_dendritic_cell	0.49	4.27506e-20	1.18287e-19	0.49	-62.8743
CD46	Macrophage	0.336	1.31216e-09	2.15568e-09	0.336	-28.7892
CD46	MDSC	0.347	3.42809e-10	5.89504e-10	0.347	-30.6598
CD46	Monocyte	0.213	0.000153214	0.000193092	0.213	-12.3384
CD46	Natural_killer_cell	0.338	1.05286e-09	1.75319e-09	0.338	-29.0874
CD46	Natural_killer_T_cell	0.254	6.18526e-06	8.43028e-06	0.254	-16.856
CD46	Plasmacytoid_dendritic_cell	0.445	1.75961e-16	4.07256e-16	0.445	-51.1249
CD46	Regulatory_T_cell	0.397	3.64689e-13	7.29378e-13	0.397	-40.3184
CD46	T_follicular_helper_cell	0.219	9.87111e-05	0.000125261	0.219	-12.9628
CD46	Type_1_T_helper_cell	0.376	7.11048e-12	1.34879e-11	0.376	-36.1095
CD46	Type_2_T_helper_cell	0.224	6.75912e-05	8.60677e-05	0.224	-13.5042
NCKAP1	Activated_B_cell	-0.471	1.71816e-18	4.39086e-18	0.471	-57.6602
NCKAP1	Activated_CD8_T_cell	-0.24	1.97889e-05	2.60082e-05	0.24	-15.2307
NCKAP1	Activated_dendritic_cell	-0.466	4.21591e-18	1.05541e-17	0.466	-56.395
NCKAP1	Eosinophil	-0.212	0.000169315	0.000212655	0.212	-12.1992
NCKAP1	Immature_B_cell	-0.36	6.08481e-11	1.087e-10	0.36	-33.0989
NCKAP1	Macrophage	-0.37	1.61319e-11	2.99826e-11	0.37	-34.9571
NCKAP1	MDSC	-0.52	7.36981e-23	2.35834e-22	0.52	-71.8446
NCKAP1	Monocyte	-0.692	1.90671e-45	2.80667e-44	0.692	-144.676
NCKAP1	Natural_killer_cell	-0.562	2.95082e-27	1.18033e-26	0.562	-86.1309
NCKAP1	Natural_killer_T_cell	-0.268	1.71207e-06	2.45153e-06	0.268	-18.6379
NCKAP1	Plasmacytoid_dendritic_cell	-0.365	3.25403e-11	5.92813e-11	0.365	-33.9736
NCKAP1	Regulatory_T_cell	-0.336	1.27522e-09	2.1044e-09	0.336	-28.8239
NCKAP1	T_follicular_helper_cell	-0.337	1.18331e-09	1.96152e-09	0.337	-28.9254
NCKAP1	Type_1_T_helper_cell	-0.479	3.74561e-19	9.91644e-19	0.479	-59.8068
NCKAP1	Type_2_T_helper_cell	0.339	8.82791e-10	1.48341e-09	0.339	-29.3284
