# Supplementary material for: Autophagy-mediated regulation patterns contribute to the alterations of the immune microenvironment in periodontitis
Source: Aging (Albany NY). 2020 Dec 3;13(1):555–77. doi: 10.18632/aging.202165 (PMC7835039; doi:10.18632/aging.202165)
Supplement: Supplementary Table 7 [file aging-13-202165-s006.xlsx]

## Sheet: table s7
Supplementary Table 7. Correlations between autophagy regulators and immune reaction gene-sets
gene	pathway	cor	pvalue	fdr	abscor	logp
CXCR4	Antigen_Processing_and_Presentation	0.535	2.21439e-24	7.72198e-24	0.535	-76.7773
CXCR4	Antimicrobials	0.676	1.09711e-42	1.86509e-41	0.676	-135.3
CXCR4	BCRSignalingPathway	0.818	5.97183e-76	8.12169e-74	0.818	-242.801
CXCR4	Chemokine_Receptors	0.719	1.12954e-50	3.41371e-49	0.719	-161.003
CXCR4	Chemokines	0.554	2.66358e-26	1.08134e-25	0.554	-82.9354
CXCR4	Cytokine_Receptors	0.672	3.73628e-42	5.64593e-41	0.672	-133.702
CXCR4	Cytokines	0.527	1.61862e-23	5.36909e-23	0.527	-73.9797
CXCR4	Interferon_Receptor	0.651	8.34637e-39	9.8705e-38	0.651	-122.93
CXCR4	Interleukins	0.517	1.40449e-22	4.54787e-22	0.517	-70.8972
CXCR4	Interleukins_Receptor	0.522	4.93497e-23	1.61724e-22	0.522	-72.3889
CXCR4	NaturalKiller_Cell_Cytotoxicity	0.808	1.04291e-72	7.09176e-71	0.808	-233.031
CXCR4	TCRsignalingPathway	0.72	8.09001e-51	2.7506e-49	0.72	-161.315
CXCR4	TGFb_Family_Member	0.333	1.82054e-09	2.70593e-09	0.333	-28.4612
CXCR4	TGFb_Family_Member_Receptor	-0.218	0.000105833	0.00012794	0.218	-12.9322
CXCR4	TNF_Family_Members	0.531	6.03718e-24	2.05264e-23	0.531	-75.3669
CXCR4	TNF_Family_Members_Receptors	0.59	1.74284e-30	1.03055e-29	0.59	-96.2925
SERPINA1	Antigen_Processing_and_Presentation	0.662	1.98398e-40	2.84022e-39	0.662	-128.049
SERPINA1	Antimicrobials	0.809	4.91882e-73	4.45973e-71	0.809	-233.7
SERPINA1	BCRSignalingPathway	0.696	2.67187e-46	5.59037e-45	0.696	-147.004
SERPINA1	Chemokine_Receptors	0.764	1.13966e-60	6.19975e-59	0.764	-193.362
SERPINA1	Chemokines	0.692	1.58748e-45	2.87862e-44	0.692	-144.639
SERPINA1	Cytokine_Receptors	0.701	4.53033e-47	1.02687e-45	0.701	-149.449
SERPINA1	Cytokines	0.653	4.22466e-39	5.22322e-38	0.653	-123.848
SERPINA1	Interferon_Receptor	0.453	4.13915e-17	9.62265e-17	0.453	-53.2063
SERPINA1	Interferons	0.237	2.56824e-05	3.18977e-05	0.237	-14.9362
SERPINA1	Interleukins	0.607	1.3692e-32	1.00654e-31	0.607	-102.97
SERPINA1	Interleukins_Receptor	0.612	2.66711e-33	2.19834e-32	0.612	-105.165
SERPINA1	NaturalKiller_Cell_Cytotoxicity	0.822	2.22033e-77	6.03929e-75	0.822	-246.55
SERPINA1	TCRsignalingPathway	0.66	4.34641e-40	5.91112e-39	0.66	-126.992
SERPINA1	TGFb_Family_Member	0.505	1.64496e-21	4.75987e-21	0.505	-67.5096
SERPINA1	TGFb_Family_Member_Receptor	-0.469	2.19077e-18	5.51749e-18	0.469	-57.3307
SERPINA1	TNF_Family_Members	0.467	3.54573e-18	8.68864e-18	0.467	-56.6756
SERPINA1	TNF_Family_Members_Receptors	0.56	5.68891e-27	2.45616e-26	0.56	-85.0737
BNIP3	Antigen_Processing_and_Presentation	-0.29	1.99616e-07	2.6879e-07	0.29	-21.827
BNIP3	Antimicrobials	-0.537	1.52369e-24	5.38239e-24	0.537	-77.298
BNIP3	BCRSignalingPathway	-0.591	1.33229e-30	8.05293e-30	0.591	-96.6483
BNIP3	Chemokine_Receptors	-0.579	3.65604e-29	1.94989e-28	0.579	-92.0506
BNIP3	Chemokines	-0.492	2.76603e-20	7.75629e-20	0.492	-63.4832
BNIP3	Cytokine_Receptors	-0.573	1.93908e-28	9.76721e-28	0.573	-89.726
BNIP3	Cytokines	-0.508	1.03685e-21	3.09915e-21	0.508	-68.1286
BNIP3	Interferon_Receptor	-0.438	5.96162e-16	1.32915e-15	0.438	-49.4184
BNIP3	Interleukins	-0.433	1.3585e-15	2.95611e-15	0.433	-48.2652
BNIP3	Interleukins_Receptor	-0.417	1.79861e-14	3.57097e-14	0.417	-44.6707
BNIP3	NaturalKiller_Cell_Cytotoxicity	-0.585	7.5918e-30	4.30202e-29	0.585	-94.2309
BNIP3	TCRsignalingPathway	-0.484	1.23695e-19	3.29852e-19	0.484	-61.3948
BNIP3	TGFb_Family_Member	-0.394	6.032e-13	1.0938e-12	0.394	-39.7338
BNIP3	TGFb_Family_Member_Receptor	0.284	3.59216e-07	4.81315e-07	0.284	-20.9865
BNIP3	TNF_Family_Members	-0.344	5.06435e-10	7.82672e-10	0.344	-30.2509
BNIP3	TNF_Family_Members_Receptors	-0.48	2.87221e-19	7.51193e-19	0.48	-60.2075
PRKCQ	Antigen_Processing_and_Presentation	0.362	4.9162e-11	8.10427e-11	0.362	-33.5225
PRKCQ	Antimicrobials	0.605	2.77402e-32	1.98561e-31	0.605	-101.99
PRKCQ	BCRSignalingPathway	0.543	4.01672e-25	1.47642e-24	0.543	-79.1642
PRKCQ	Chemokine_Receptors	0.546	1.54638e-25	5.92418e-25	0.546	-80.4816
PRKCQ	Chemokines	0.589	2.38958e-30	1.38291e-29	0.589	-95.8682
PRKCQ	Cytokine_Receptors	0.489	4.8727e-20	1.35242e-19	0.489	-62.6811
PRKCQ	Cytokines	0.467	3.19062e-18	7.88953e-18	0.467	-56.8148
PRKCQ	Interferon_Receptor	0.409	6.3011e-14	1.19021e-13	0.409	-42.9339
PRKCQ	Interferons	0.264	2.4788e-06	3.18034e-06	0.264	-18.2624
PRKCQ	Interleukins	0.531	6.36059e-24	2.1359e-23	0.531	-75.3095
PRKCQ	Interleukins_Receptor	0.429	2.72612e-15	5.88496e-15	0.429	-47.2719
PRKCQ	NaturalKiller_Cell_Cytotoxicity	0.639	4.78264e-37	4.64599e-36	0.639	-117.373
PRKCQ	TCRsignalingPathway	0.639	6.10665e-37	5.72762e-36	0.639	-117.071
PRKCQ	TGFb_Family_Member	0.342	6.38606e-10	9.763e-10	0.342	-29.932
PRKCQ	TNF_Family_Members	0.508	8.94815e-22	2.70433e-21	0.508	-68.3252
PRKCQ	TNF_Family_Members_Receptors	0.312	2.08559e-08	2.93928e-08	0.312	-25.02
DRAM1	Antimicrobials	0.547	1.24182e-25	4.82536e-25	0.547	-80.7776
DRAM1	BCRSignalingPathway	0.612	3.39478e-33	2.71582e-32	0.612	-104.86
DRAM1	Chemokine_Receptors	0.649	1.93927e-38	2.10992e-37	0.649	-121.834
DRAM1	Chemokines	0.562	3.46092e-27	1.56895e-26	0.562	-85.7203
DRAM1	Cytokine_Receptors	0.56	5.4375e-27	2.38549e-26	0.56	-85.1158
DRAM1	Cytokines	0.466	4.04823e-18	9.83142e-18	0.466	-56.4973
DRAM1	Interferon_Receptor	0.443	2.33082e-16	5.2832e-16	0.443	-50.7494
DRAM1	Interferons	-0.175	0.00192587	0.00221029	0.175	-8.82155
DRAM1	Interleukins	0.323	5.83082e-09	8.43607e-09	0.323	-26.8208
DRAM1	Interleukins_Receptor	0.545	1.98112e-25	7.38172e-25	0.545	-80.1642
DRAM1	NaturalKiller_Cell_Cytotoxicity	0.571	3.17474e-28	1.54202e-27	0.571	-89.0672
DRAM1	TCRsignalingPathway	0.553	3.05141e-26	1.22056e-25	0.553	-82.7607
DRAM1	TGFb_Family_Member	0.331	2.22277e-09	3.26807e-09	0.331	-28.1889
DRAM1	TNF_Family_Members	0.604	3.53001e-32	2.46196e-31	0.604	-101.68
DRAM1	TNF_Family_Members_Receptors	0.54	7.56842e-25	2.7087e-24	0.54	-78.2887
DNAJB9	Antigen_Processing_and_Presentation	0.391	9.12825e-13	1.6228e-12	0.391	-39.1647
DNAJB9	Antimicrobials	0.345	4.0599e-10	6.34651e-10	0.345	-30.5533
DNAJB9	BCRSignalingPathway	0.64	3.47328e-37	3.49901e-36	0.64	-117.782
DNAJB9	Chemokine_Receptors	0.458	1.69046e-17	3.99831e-17	0.458	-54.4734
DNAJB9	Chemokines	0.241	1.7856e-05	2.2279e-05	0.241	-15.454
DNAJB9	Cytokine_Receptors	0.379	4.79608e-12	8.15334e-12	0.379	-36.8357
DNAJB9	Cytokines	0.201	0.000379255	0.000444643	0.201	-11.1351
DNAJB9	Interferon_Receptor	0.716	4.40986e-50	1.19948e-48	0.716	-159.19
DNAJB9	Interleukins	0.367	2.65403e-11	4.42881e-11	0.367	-34.3943
DNAJB9	Interleukins_Receptor	0.264	2.41376e-06	3.11158e-06	0.264	-18.2939
DNAJB9	NaturalKiller_Cell_Cytotoxicity	0.599	1.44733e-31	9.60178e-31	0.599	-99.7165
DNAJB9	TCRsignalingPathway	0.454	3.50232e-17	8.21235e-17	0.454	-53.435
DNAJB9	TNF_Family_Members	0.381	3.8972e-12	6.66691e-12	0.381	-37.1261
DNAJB9	TNF_Family_Members_Receptors	0.305	4.29604e-08	5.99242e-08	0.305	-23.9923
EDEM1	Antigen_Processing_and_Presentation	0.352	1.90739e-10	3.05183e-10	0.352	-31.6096
EDEM1	Antimicrobials	0.389	1.2003e-12	2.10634e-12	0.389	-38.7884
EDEM1	BCRSignalingPathway	0.695	5.48705e-46	1.06606e-44	0.695	-146.073
EDEM1	Chemokine_Receptors	0.506	1.43546e-21	4.19833e-21	0.506	-67.6907
EDEM1	Chemokines	0.293	1.54308e-07	2.10914e-07	0.293	-22.1768
EDEM1	Cytokine_Receptors	0.396	4.29208e-13	7.83521e-13	0.396	-40.2151
EDEM1	Cytokines	0.333	1.75796e-09	2.62728e-09	0.333	-28.5038
EDEM1	Interferon_Receptor	0.61	6.3898e-33	4.96579e-32	0.61	-103.99
EDEM1	Interleukins	0.303	5.21846e-08	7.24194e-08	0.303	-23.719
EDEM1	Interleukins_Receptor	0.335	1.42048e-09	2.1585e-09	0.335	-28.7873
EDEM1	NaturalKiller_Cell_Cytotoxicity	0.603	4.87177e-32	3.3128e-31	0.603	-101.252
EDEM1	TCRsignalingPathway	0.425	5.06371e-15	1.05948e-14	0.425	-46.4236
EDEM1	TGFb_Family_Member	0.247	1.11508e-05	1.41071e-05	0.247	-16.1132
EDEM1	TGFb_Family_Member_Receptor	-0.276	7.62911e-07	1.01225e-06	0.276	-19.914
EDEM1	TNF_Family_Members	0.357	9.93905e-11	1.61882e-10	0.357	-32.5243
EDEM1	TNF_Family_Members_Receptors	0.477	5.56758e-19	1.44227e-18	0.477	-59.2664
RAB11A	Antigen_Processing_and_Presentation	-0.506	1.34235e-21	3.96868e-21	0.506	-67.7718
RAB11A	Antimicrobials	-0.564	1.74929e-27	8.20358e-27	0.564	-86.6558
RAB11A	BCRSignalingPathway	-0.65	1.39283e-38	1.57855e-37	0.65	-122.253
RAB11A	Chemokine_Receptors	-0.582	1.76497e-29	9.79737e-29	0.582	-93.0435
RAB11A	Chemokines	-0.414	2.73001e-14	5.30402e-14	0.414	-44.0999
RAB11A	Cytokine_Receptors	-0.55	5.91063e-26	2.32999e-25	0.55	-81.8279
RAB11A	Cytokines	-0.508	8.86154e-22	2.70433e-21	0.508	-68.3252
RAB11A	Interferon_Receptor	-0.424	6.21127e-15	1.2799e-14	0.424	-46.151
RAB11A	Interleukins	-0.313	1.85438e-08	2.64079e-08	0.313	-25.1745
RAB11A	Interleukins_Receptor	-0.476	5.82296e-19	1.49419e-18	0.476	-59.2153
RAB11A	NaturalKiller_Cell_Cytotoxicity	-0.593	7.42192e-31	4.5881e-30	0.593	-97.4599
RAB11A	TCRsignalingPathway	-0.435	9.76941e-16	2.16039e-15	0.435	-48.7176
RAB11A	TGFb_Family_Member	-0.486	9.46169e-20	2.5481e-19	0.486	-61.7672
RAB11A	TGFb_Family_Member_Receptor	0.561	4.13668e-27	1.84455e-26	0.561	-85.4869
RAB11A	TNF_Family_Members	-0.259	3.80187e-06	4.85497e-06	0.259	-17.6521
RAB11A	TNF_Family_Members_Receptors	-0.622	1.32885e-34	1.16596e-33	0.622	-109.402
FOS	Antigen_Processing_and_Presentation	0.189	0.000838887	0.000966853	0.189	-10.0144
FOS	Antimicrobials	0.398	3.29034e-13	6.08825e-13	0.398	-40.579
FOS	BCRSignalingPathway	0.393	6.84007e-13	1.23212e-12	0.393	-39.562
FOS	Chemokine_Receptors	0.334	1.71288e-09	2.57406e-09	0.334	-28.5333
FOS	Chemokines	0.374	1.04388e-11	1.76357e-11	0.374	-35.7227
FOS	Cytokine_Receptors	0.424	6.04444e-15	1.25503e-14	0.424	-46.1793
FOS	Cytokines	0.273	1.0618e-06	1.39521e-06	0.273	-19.4511
FOS	Interferon_Receptor	0.313	1.87999e-08	2.66332e-08	0.313	-25.1622
FOS	Interleukins	0.347	3.45419e-10	5.43086e-10	0.347	-30.7781
FOS	Interleukins_Receptor	0.232	3.76042e-05	4.64925e-05	0.232	-14.3926
FOS	NaturalKiller_Cell_Cytotoxicity	0.324	4.96521e-09	7.22212e-09	0.324	-27.0449
FOS	TCRsignalingPathway	0.418	1.47221e-14	2.96624e-14	0.418	-44.9384
FOS	TGFb_Family_Member_Receptor	0.168	0.00294763	0.00334065	0.168	-8.22566
FOS	TNF_Family_Members	0.292	1.73055e-07	2.35355e-07	0.292	-22.0187
FOS	TNF_Family_Members_Receptors	0.245	1.32785e-05	1.67211e-05	0.245	-15.868
CCR2	Antigen_Processing_and_Presentation	0.291	1.79834e-07	2.43358e-07	0.291	-21.9704
CCR2	Antimicrobials	0.342	6.38902e-10	9.763e-10	0.342	-29.932
CCR2	BCRSignalingPathway	0.564	1.97927e-27	9.12478e-27	0.564	-86.5023
CCR2	Chemokine_Receptors	0.516	1.80585e-22	5.77872e-22	0.516	-70.5517
CCR2	Chemokines	0.271	1.25595e-06	1.6424e-06	0.271	-19.2158
CCR2	Cytokine_Receptors	0.347	3.28722e-10	5.1984e-10	0.347	-30.8412
CCR2	Interferon_Receptor	0.58	3.1637e-29	1.72105e-28	0.58	-92.2307
CCR2	Interleukins	0.164	0.0037757	0.00424376	0.164	-7.88044
CCR2	Interleukins_Receptor	0.397	3.70371e-13	6.80682e-13	0.397	-40.4181
CCR2	NaturalKiller_Cell_Cytotoxicity	0.558	9.48436e-27	4.03085e-26	0.558	-84.359
CCR2	TCRsignalingPathway	0.503	2.55249e-21	7.23204e-21	0.503	-66.9061
CCR2	TNF_Family_Members	0.532	4.23874e-24	1.45941e-23	0.532	-75.859
CCR2	TNF_Family_Members_Receptors	0.329	3.02699e-09	4.42657e-09	0.329	-27.7512
IL24	Antigen_Processing_and_Presentation	0.164	0.00376336	0.00424376	0.164	-7.88044
IL24	Antimicrobials	0.512	3.79789e-22	1.18739e-21	0.512	-69.5127
IL24	BCRSignalingPathway	0.452	4.90794e-17	1.13132e-16	0.452	-52.9728
IL24	Chemokine_Receptors	0.608	9.39488e-33	7.09835e-32	0.608	-103.474
IL24	Chemokines	0.557	1.05992e-26	4.43537e-26	0.557	-84.2211
IL24	Cytokine_Receptors	0.542	4.68135e-25	1.69777e-24	0.542	-78.9626
IL24	Cytokines	0.578	5.25074e-29	2.74654e-28	0.578	-91.5564
IL24	Interferon_Receptor	0.434	1.15695e-15	2.53782e-15	0.434	-48.4853
IL24	Interferons	0.174	0.00205252	0.00234573	0.174	-8.73575
IL24	Interleukins	0.654	3.7083e-39	4.80314e-38	0.654	-123.969
IL24	Interleukins_Receptor	0.475	7.99611e-19	2.03266e-18	0.475	-58.7713
IL24	NaturalKiller_Cell_Cytotoxicity	0.512	3.68087e-22	1.16418e-21	0.512	-69.5412
IL24	TCRsignalingPathway	0.332	2.16892e-09	3.20623e-09	0.332	-28.2165
IL24	TGFb_Family_Member	0.418	1.52108e-14	3.04216e-14	0.418	-44.9019
IL24	TGFb_Family_Member_Receptor	-0.224	7.08633e-05	8.64341e-05	0.224	-13.498
IL24	TNF_Family_Members	0.426	4.06509e-15	8.57135e-15	0.426	-46.7294
IL24	TNF_Family_Members_Receptors	0.417	1.83657e-14	3.6199e-14	0.417	-44.651
PEX3	Antigen_Processing_and_Presentation	-0.384	2.38638e-12	4.13436e-12	0.384	-37.8155
PEX3	Antimicrobials	-0.595	4.53858e-31	2.93927e-30	0.595	-98.1024
PEX3	BCRSignalingPathway	-0.594	6.0265e-31	3.81211e-30	0.594	-97.7273
PEX3	Chemokine_Receptors	-0.571	3.11754e-28	1.54176e-27	0.571	-89.0675
PEX3	Chemokines	-0.428	3.06823e-15	6.57134e-15	0.428	-47.1127
PEX3	Cytokine_Receptors	-0.674	2.02668e-42	3.24268e-41	0.674	-134.502
PEX3	Cytokines	-0.644	8.81925e-38	9.22629e-37	0.644	-119.706
PEX3	Interferon_Receptor	-0.22	9.07235e-05	0.000110164	0.22	-13.1481
PEX3	Interleukins	-0.298	9.04038e-08	1.24191e-07	0.298	-22.9409
PEX3	Interleukins_Receptor	-0.469	2.42424e-18	6.04949e-18	0.469	-57.1979
PEX3	NaturalKiller_Cell_Cytotoxicity	-0.573	1.81957e-28	9.33816e-28	0.573	-89.7908
PEX3	TCRsignalingPathway	-0.356	1.05282e-10	1.70456e-10	0.356	-32.4499
PEX3	TGFb_Family_Member	-0.723	2.03596e-51	7.91115e-50	0.723	-163.113
PEX3	TGFb_Family_Member_Receptor	0.627	3.06698e-35	2.78073e-34	0.627	-111.47
PEX3	TNF_Family_Members_Receptors	-0.761	8.86385e-60	4.01828e-58	0.761	-190.665
ERN1	Antimicrobials	0.249	8.90341e-06	1.13165e-05	0.249	-16.4312
ERN1	BCRSignalingPathway	0.565	1.34595e-27	6.42279e-27	0.565	-87.0089
ERN1	Chemokine_Receptors	0.4	2.35308e-13	4.41406e-13	0.4	-41.043
ERN1	Cytokine_Receptors	0.353	1.67571e-10	2.69699e-10	0.353	-31.7879
ERN1	Cytokines	0.209	0.000210559	0.000250096	0.209	-11.9652
ERN1	Interferon_Receptor	0.487	6.87324e-20	1.88841e-19	0.487	-62.1995
ERN1	Interferons	-0.244	1.34181e-05	1.6819e-05	0.244	-15.8596
ERN1	Interleukins_Receptor	0.281	5.05018e-07	6.73358e-07	0.281	-20.5021
ERN1	NaturalKiller_Cell_Cytotoxicity	0.421	9.60785e-15	1.96491e-14	0.421	-45.5325
ERN1	TCRsignalingPathway	0.271	1.31706e-06	1.71407e-06	0.271	-19.1541
ERN1	TGFb_Family_Member	0.193	0.000618431	0.00071886	0.193	-10.442
ERN1	TGFb_Family_Member_Receptor	-0.169	0.00280923	0.00319711	0.169	-8.28901
ERN1	TNF_Family_Members	0.274	9.25641e-07	1.22221e-06	0.274	-19.6421
ERN1	TNF_Family_Members_Receptors	0.487	6.95135e-20	1.89077e-19	0.487	-62.1977
CFLAR	Antigen_Processing_and_Presentation	0.464	6.27734e-18	1.49775e-17	0.464	-55.89
CFLAR	Antimicrobials	0.409	5.92699e-14	1.12737e-13	0.409	-43.0121
CFLAR	BCRSignalingPathway	0.617	6.13715e-34	5.21657e-33	0.617	-107.241
CFLAR	Chemokine_Receptors	0.399	2.99514e-13	5.57998e-13	0.399	-40.7048
CFLAR	Chemokines	0.21	0.000196711	0.000235707	0.21	-12.0507
CFLAR	Cytokine_Receptors	0.387	1.53428e-12	2.67516e-12	0.387	-38.4435
CFLAR	Cytokines	0.21	0.000198205	0.000236456	0.21	-12.0461
CFLAR	Interferon_Receptor	0.504	2.3327e-21	6.67887e-21	0.504	-67.0209
CFLAR	Interleukins	0.347	3.17528e-10	5.05074e-10	0.347	-30.8828
CFLAR	Interleukins_Receptor	0.321	7.33017e-09	1.04937e-08	0.321	-26.5059
CFLAR	NaturalKiller_Cell_Cytotoxicity	0.546	1.56869e-25	5.92617e-25	0.546	-80.4811
CFLAR	TCRsignalingPathway	0.464	6.16893e-18	1.48491e-17	0.464	-55.9024
CFLAR	TGFb_Family_Member	0.197	0.00049857	0.000582021	0.197	-10.7466
CFLAR	TGFb_Family_Member_Receptor	-0.23	4.3393e-05	5.34068e-05	0.23	-14.1926
CFLAR	TNF_Family_Members	0.335	1.47081e-09	2.22255e-09	0.335	-28.7451
CFLAR	TNF_Family_Members_Receptors	0.416	2.13018e-14	4.1684e-14	0.416	-44.4475
CD46	Antigen_Processing_and_Presentation	0.389	1.1717e-12	2.0695e-12	0.389	-38.8139
CD46	Antimicrobials	0.345	4.42431e-10	6.87664e-10	0.345	-30.4376
CD46	BCRSignalingPathway	0.45	7.64073e-17	1.74645e-16	0.45	-52.3464
CD46	Chemokine_Receptors	0.227	5.59663e-05	6.85713e-05	0.227	-13.832
CD46	Chemokines	0.19	0.000762818	0.000882921	0.19	-10.1454
CD46	Cytokine_Receptors	0.206	0.000262228	0.000310113	0.206	-11.6549
CD46	Interferon_Receptor	0.414	2.79596e-14	5.39362e-14	0.414	-44.0757
CD46	Interleukins	0.321	7.14066e-09	1.02765e-08	0.321	-26.5361
CD46	NaturalKiller_Cell_Cytotoxicity	0.374	1.06574e-11	1.78939e-11	0.374	-35.7017
CD46	TCRsignalingPathway	0.361	6.00733e-11	9.84333e-11	0.361	-33.2421
CD46	TNF_Family_Members	0.301	6.6418e-08	9.17041e-08	0.301	-23.3784
CD46	TNF_Family_Members_Receptors	0.202	0.000344499	0.000405644	0.202	-11.2675
NCKAP1	Antimicrobials	-0.419	1.24379e-14	2.52472e-14	0.419	-45.1709
NCKAP1	BCRSignalingPathway	-0.512	4.5496e-22	1.40624e-21	0.512	-69.2686
NCKAP1	Chemokine_Receptors	-0.484	1.41074e-19	3.72544e-19	0.484	-61.2192
NCKAP1	Chemokines	-0.305	4.1638e-08	5.8379e-08	0.305	-24.03
NCKAP1	Cytokine_Receptors	-0.555	2.16723e-26	8.93163e-26	0.555	-83.2112
NCKAP1	Cytokines	-0.427	3.51394e-15	7.46713e-15	0.427	-46.9284
NCKAP1	Interferon_Receptor	-0.215	0.000137628	0.000165641	0.215	-12.5597
NCKAP1	Interferons	0.365	3.47949e-11	5.77087e-11	0.365	-34.0124
NCKAP1	Interleukins_Receptor	-0.439	4.9634e-16	1.11574e-15	0.439	-49.6709
NCKAP1	NaturalKiller_Cell_Cytotoxicity	-0.392	7.49928e-13	1.34198e-12	0.392	-39.4388
NCKAP1	TCRsignalingPathway	-0.267	1.81652e-06	2.35282e-06	0.267	-18.6972
NCKAP1	TGFb_Family_Member	-0.412	3.9249e-14	7.51812e-14	0.412	-43.5966
NCKAP1	TGFb_Family_Member_Receptor	0.382	3.07975e-12	5.30185e-12	0.382	-37.4566
NCKAP1	TNF_Family_Members_Receptors	-0.704	1.18977e-47	2.94197e-46	0.704	-151.252
