# Supplementary material for: Autophagy-mediated regulation patterns contribute to the alterations of the immune microenvironment in periodontitis
Source: Aging (Albany NY). 2020 Dec 3;13(1):555–77. doi: 10.18632/aging.202165 (PMC7835039; doi:10.18632/aging.202165)
Supplement: Supplementary Table 9 [file aging-13-202165-s008.xlsx]

## Sheet: table s9
Supplementary Table 9. Correlations between autophagy regulators and HLA gene
gene	pathway	cor	pvalue	fdr	abscor	logp
CXCR4	HLA-E	0.41	5.3013e-14	1.61563e-13	0.41	-42.493
CXCR4	HLA-C	0.633	3.92784e-36	1.04742e-34	0.633	-112.879
CXCR4	HLA-J	0.352	1.73218e-10	4.23129e-10	0.352	-31.1382
CXCR4	HLA-DQB2	-0.346	3.97216e-10	9.2108e-10	0.346	-30.016
CXCR4	HLA-DQA1	0.151	0.00779759	0.00986257	0.151	-6.66382
CXCR4	HLA-A	0.513	3.62985e-22	2.03781e-21	0.513	-68.7335
CXCR4	HLA-DMA	0.704	1.02908e-47	8.23267e-46	0.704	-149.767
CXCR4	HLA-DOB	0.732	2.70049e-53	4.32079e-51	0.732	-167.307
CXCR4	HLA-DRB1	0.506	1.38912e-21	7.40866e-21	0.506	-66.8713
CXCR4	HLA-B	0.483	1.593e-19	7.17973e-19	0.483	-60.2727
CXCR4	HLA-DOA	0.264	2.38895e-06	3.92033e-06	0.264	-17.9606
CXCR4	HLA-DPB1	0.297	9.60458e-08	1.87406e-07	0.297	-22.3473
CXCR4	HLA-DRA	0.559	7.66729e-27	7.91462e-26	0.559	-83.3856
CXCR4	HLA-DRB6	0.307	3.33125e-08	6.7044e-08	0.307	-23.8303
CXCR4	HLA-F	0.532	4.50716e-24	3.13541e-23	0.532	-74.7557
CXCR4	HLA-G	0.511	5.37979e-22	2.91785e-21	0.511	-68.2156
CXCR4	HLA-DMB	0.643	1.63727e-37	5.82141e-36	0.643	-117.048
CXCR4	HLA-DPA1	0.597	2.6287e-31	4.67325e-30	0.597	-97.4334
SERPINA1	HLA-E	0.525	2.57005e-23	1.64483e-22	0.525	-72.3645
SERPINA1	HLA-C	0.649	1.73521e-38	7.07932e-37	0.649	-120.088
SERPINA1	HLA-J	0.514	2.57724e-22	1.49949e-21	0.514	-69.176
SERPINA1	HLA-DQB1	-0.168	0.0030855	0.00399741	0.168	-7.96672
SERPINA1	HLA-DQB2	-0.216	0.000124359	0.000180515	0.216	-12.4356
SERPINA1	HLA-DQA1	0.25	8.46057e-06	1.34029e-05	0.25	-16.1871
SERPINA1	HLA-A	0.567	8.54597e-28	9.76682e-27	0.567	-86.4042
SERPINA1	HLA-DMA	0.683	5.59334e-44	2.98311e-42	0.683	-137.944
SERPINA1	HLA-DOB	0.585	7.42717e-30	1.08032e-28	0.585	-92.9025
SERPINA1	HLA-DRB1	0.624	7.24997e-35	1.65714e-33	0.624	-108.895
SERPINA1	HLA-B	0.55	7.04896e-26	6.26574e-25	0.55	-80.4007
SERPINA1	HLA-DOA	0.367	2.47067e-11	6.42776e-11	0.367	-33.8569
SERPINA1	HLA-DPB1	0.366	2.86244e-11	7.32785e-11	0.366	-33.6678
SERPINA1	HLA-DRA	0.552	4.35143e-26	3.97845e-25	0.552	-81.056
SERPINA1	HLA-DRB6	0.56	5.18487e-27	5.72123e-26	0.56	-83.8538
SERPINA1	HLA-F	0.627	2.5086e-35	6.17501e-34	0.627	-110.319
SERPINA1	HLA-G	0.599	1.33717e-31	2.51703e-30	0.599	-98.3261
SERPINA1	HLA-DMB	0.605	2.30287e-32	4.9128e-31	0.605	-100.683
SERPINA1	HLA-DPA1	0.58	2.54741e-29	3.39654e-28	0.58	-91.2499
BNIP3	HLA-E	-0.366	2.95236e-11	7.49805e-11	0.366	-33.6347
BNIP3	HLA-C	-0.527	1.62737e-23	1.08491e-22	0.527	-72.9648
BNIP3	HLA-J	-0.33	2.50458e-09	5.48949e-09	0.33	-27.4407
BNIP3	HLA-DQB1	0.178	0.00161563	0.00213637	0.178	-8.87062
BNIP3	HLA-DQB2	0.318	9.99501e-09	2.10421e-08	0.318	-25.5021
BNIP3	HLA-A	-0.456	2.42582e-17	9.35256e-17	0.456	-53.2474
BNIP3	HLA-DMA	-0.465	4.9582e-18	2.00838e-17	0.465	-55.4667
BNIP3	HLA-DOB	-0.538	1.28202e-24	9.54058e-24	0.538	-76.4722
BNIP3	HLA-DRB1	-0.403	1.51159e-13	4.4377e-13	0.403	-41.0353
BNIP3	HLA-B	-0.379	5.35539e-12	1.4281e-11	0.379	-36.0271
BNIP3	HLA-DOA	-0.206	0.000260583	0.000372261	0.206	-11.3914
BNIP3	HLA-DPB1	-0.193	0.000631874	0.000871551	0.193	-10.1641
BNIP3	HLA-DRA	-0.274	9.76207e-07	1.69775e-06	0.274	-19.1679
BNIP3	HLA-DRB6	-0.358	8.3364e-11	2.0841e-10	0.358	-32.1599
BNIP3	HLA-F	-0.427	3.44462e-15	1.13637e-14	0.427	-46.3226
BNIP3	HLA-G	-0.414	2.98608e-14	9.18795e-14	0.414	-43.3072
BNIP3	HLA-DMB	-0.388	1.41068e-12	3.85827e-12	0.388	-37.9152
BNIP3	HLA-DPA1	-0.359	7.46833e-11	1.88178e-10	0.359	-32.3072
PRKCQ	HLA-E	0.295	1.24534e-07	2.38627e-07	0.295	-21.9987
PRKCQ	HLA-DPB2	0.266	2.10272e-06	3.48638e-06	0.266	-18.1298
PRKCQ	HLA-C	0.464	6.31897e-18	2.46594e-17	0.464	-55.1706
PRKCQ	HLA-J	0.309	2.66544e-08	5.43274e-08	0.309	-24.1337
PRKCQ	HLA-DQB2	-0.239	2.14302e-05	3.31288e-05	0.239	-14.8816
PRKCQ	HLA-A	0.448	1.01086e-16	3.63457e-16	0.448	-51.2891
PRKCQ	HLA-DMA	0.445	1.91269e-16	6.72595e-16	0.445	-50.4011
PRKCQ	HLA-DOB	0.451	5.88062e-17	2.18814e-16	0.451	-52.0211
PRKCQ	HLA-DRB1	0.355	1.25601e-10	3.10299e-10	0.355	-31.5856
PRKCQ	HLA-B	0.257	4.40244e-06	7.15117e-06	0.257	-17.0934
PRKCQ	HLA-DOA	0.33	2.69239e-09	5.86099e-09	0.33	-27.3462
PRKCQ	HLA-DPB1	0.348	2.9235e-10	6.92978e-10	0.348	-30.4265
PRKCQ	HLA-DRA	0.351	1.9883e-10	4.82013e-10	0.351	-30.9502
PRKCQ	HLA-DRB6	0.295	1.23715e-07	2.38487e-07	0.295	-21.9996
PRKCQ	HLA-F	0.43	2.18886e-15	7.29621e-15	0.43	-46.9618
PRKCQ	HLA-G	0.387	1.65687e-12	4.4932e-12	0.387	-37.6954
PRKCQ	HLA-DMB	0.517	1.25554e-22	7.58063e-22	0.517	-70.1601
PRKCQ	HLA-DPA1	0.405	1.22192e-13	3.65433e-13	0.405	-41.3155
DRAM1	HLA-E	0.271	1.31712e-06	2.2539e-06	0.271	-18.7591
DRAM1	HLA-C	0.511	5.37279e-22	2.91785e-21	0.511	-68.2156
DRAM1	HLA-DQB2	-0.272	1.11945e-06	1.92593e-06	0.272	-18.986
DRAM1	HLA-DQA1	0.162	0.00413867	0.00531877	0.162	-7.55469
DRAM1	HLA-A	0.54	7.24599e-25	5.52076e-24	0.54	-77.2614
DRAM1	HLA-DMA	0.465	4.79795e-18	1.96839e-17	0.465	-55.4958
DRAM1	HLA-DOB	0.502	3.31623e-21	1.68444e-20	0.502	-65.6863
DRAM1	HLA-DRB1	0.321	7.63767e-09	1.62937e-08	0.321	-25.8711
DRAM1	HLA-B	0.269	1.47939e-06	2.50478e-06	0.269	-18.6069
DRAM1	HLA-DPB1	0.204	0.000302583	0.000428437	0.204	-11.1886
DRAM1	HLA-DRA	0.294	1.30666e-07	2.48888e-07	0.294	-21.938
DRAM1	HLA-F	0.415	2.38684e-14	7.48813e-14	0.415	-43.6024
DRAM1	HLA-G	0.291	1.77998e-07	3.3116e-07	0.291	-21.526
DRAM1	HLA-DMB	0.553	3.33752e-26	3.14119e-25	0.553	-81.3969
DRAM1	HLA-DPA1	0.448	1.12761e-16	4.00927e-16	0.448	-51.1475
DNAJB9	HLA-E	0.277	7.54631e-07	1.31957e-06	0.277	-19.5315
DNAJB9	HLA-DPB2	0.152	0.00721924	0.00916729	0.152	-6.76929
DNAJB9	HLA-C	0.493	2.02603e-20	9.82319e-20	0.493	-63.1424
DNAJB9	HLA-J	0.195	0.000565945	0.000783993	0.195	-10.3169
DNAJB9	HLA-DQB2	-0.31	2.45564e-08	5.0372e-08	0.31	-24.2428
DNAJB9	HLA-A	0.298	9.20276e-08	1.80668e-07	0.298	-22.4002
DNAJB9	HLA-DMA	0.489	4.94444e-20	2.3268e-19	0.489	-61.8983
DNAJB9	HLA-DOB	0.712	3.72256e-49	3.97073e-47	0.712	-154.141
DNAJB9	HLA-DRB1	0.196	0.000524946	0.000733549	0.196	-10.4128
DNAJB9	HLA-B	0.284	3.77884e-07	6.82279e-07	0.284	-20.4831
DNAJB9	HLA-DOA	0.269	1.56108e-06	2.61541e-06	0.269	-18.5445
DNAJB9	HLA-DRA	0.377	6.47976e-12	1.71366e-11	0.377	-35.7641
DNAJB9	HLA-F	0.313	1.74423e-08	3.62438e-08	0.313	-24.7177
DNAJB9	HLA-G	0.351	2.07176e-10	4.98468e-10	0.351	-30.9018
DNAJB9	HLA-DMB	0.416	2.23804e-14	7.09082e-14	0.416	-43.681
DNAJB9	HLA-DPA1	0.394	6.15893e-13	1.74412e-12	0.394	-39.0606
EDEM1	HLA-E	0.309	2.73963e-08	5.54861e-08	0.309	-24.1033
EDEM1	HLA-C	0.587	4.51794e-30	6.88449e-29	0.587	-93.5526
EDEM1	HLA-DQB2	-0.328	3.29699e-09	7.08079e-09	0.328	-27.0734
EDEM1	HLA-A	0.396	4.6765e-13	1.33614e-12	0.396	-39.4451
EDEM1	HLA-DMA	0.571	2.98032e-28	3.66809e-27	0.571	-87.817
EDEM1	HLA-DOB	0.798	1.09352e-69	3.49925e-67	0.798	-220.762
EDEM1	HLA-DRB1	0.291	1.91847e-07	3.54862e-07	0.291	-21.4262
EDEM1	HLA-B	0.284	3.79518e-07	6.82279e-07	0.284	-20.4831
EDEM1	HLA-DOA	0.231	3.99832e-05	6.00686e-05	0.231	-14.023
EDEM1	HLA-DRA	0.341	6.71147e-10	1.52317e-09	0.341	-29.2903
EDEM1	HLA-F	0.351	2.12171e-10	5.06678e-10	0.351	-30.8782
EDEM1	HLA-G	0.346	3.80873e-10	8.96171e-10	0.346	-30.0555
EDEM1	HLA-DMB	0.498	7.37005e-21	3.68503e-20	0.498	-64.5569
EDEM1	HLA-DPA1	0.388	1.33818e-12	3.69152e-12	0.388	-37.9789
RAB11A	HLA-E	-0.517	1.47282e-22	8.72784e-22	0.517	-69.9568
RAB11A	HLA-DPB2	0.236	2.67266e-05	4.11178e-05	0.236	-14.5699
RAB11A	HLA-C	-0.634	2.83162e-36	9.0612e-35	0.634	-113.088
RAB11A	HLA-J	-0.455	2.84342e-17	1.08321e-16	0.455	-53.0355
RAB11A	HLA-DQB2	0.2	0.000407788	0.000572334	0.2	-10.7709
RAB11A	HLA-A	-0.545	2.14033e-25	1.75617e-24	0.545	-78.9138
RAB11A	HLA-DMA	-0.695	3.98332e-46	2.54932e-44	0.695	-144.815
RAB11A	HLA-DOB	-0.593	8.86193e-31	1.49254e-29	0.593	-95.7581
RAB11A	HLA-DRB1	-0.633	3.52117e-36	1.02434e-34	0.633	-112.911
RAB11A	HLA-B	-0.571	3.29584e-28	3.90619e-27	0.571	-87.7263
RAB11A	HLA-DOA	-0.289	2.19141e-07	4.03017e-07	0.289	-21.2427
RAB11A	HLA-DRA	-0.514	2.63691e-22	1.5068e-21	0.514	-69.169
RAB11A	HLA-DRB6	-0.389	1.14074e-12	3.17422e-12	0.389	-38.1967
RAB11A	HLA-F	-0.577	6.53245e-29	8.36154e-28	0.577	-89.9502
RAB11A	HLA-G	-0.557	1.27964e-26	1.27964e-25	0.557	-82.6925
RAB11A	HLA-DMB	-0.497	9.90247e-21	4.87506e-20	0.497	-64.1531
RAB11A	HLA-DPA1	-0.493	2.26634e-20	1.08243e-19	0.493	-63.0024
FOS	HLA-C	0.203	0.000318144	0.000448484	0.203	-11.1227
FOS	HLA-J	0.235	2.96374e-05	4.53779e-05	0.235	-14.4277
FOS	HLA-DQB2	-0.23	4.19415e-05	6.27162e-05	0.23	-13.9608
FOS	HLA-A	0.253	6.76631e-06	1.08261e-05	0.253	-16.4951
FOS	HLA-DMA	0.222	8.26253e-05	0.000122408	0.222	-12.996
FOS	HLA-DRB1	0.219	0.000103604	0.00015278	0.219	-12.6763
FOS	HLA-B	0.279	5.89635e-07	1.03672e-06	0.279	-19.8795
FOS	HLA-DRA	0.339	8.88197e-10	1.98757e-09	0.339	-28.9063
FOS	HLA-F	0.249	8.77406e-06	1.3831e-05	0.249	-16.1417
FOS	HLA-G	0.23	4.42509e-05	6.58618e-05	0.23	-13.8902
FOS	HLA-DMB	0.165	0.0036148	0.00466425	0.165	-7.74414
FOS	HLA-DPA1	0.255	5.5752e-06	9.01042e-06	0.255	-16.76
CCR2	HLA-E	0.234	3.16625e-05	4.82476e-05	0.234	-14.3392
CCR2	HLA-DPB2	0.155	0.0063063	0.0080399	0.155	-6.95861
CCR2	HLA-C	0.454	3.3627e-17	1.26596e-16	0.454	-52.8106
CCR2	HLA-DQB2	-0.185	0.00105335	0.00141626	0.185	-9.46369
CCR2	HLA-A	0.386	1.89591e-12	5.09824e-12	0.386	-37.5131
CCR2	HLA-DMA	0.541	5.1692e-25	4.13536e-24	0.541	-77.6783
CCR2	HLA-DOB	0.592	1.04588e-30	1.67341e-29	0.592	-95.5931
CCR2	HLA-DRB1	0.3	7.28531e-08	1.43907e-07	0.3	-22.7284
CCR2	HLA-B	0.259	3.85843e-06	6.29948e-06	0.259	-17.2763
CCR2	HLA-DPB1	0.241	1.7724e-05	2.75324e-05	0.241	-15.1485
CCR2	HLA-DRA	0.39	1.02302e-12	2.87162e-12	0.39	-38.3413
CCR2	HLA-F	0.345	4.39159e-10	1.01101e-09	0.345	-29.8816
CCR2	HLA-G	0.282	4.63196e-07	8.28061e-07	0.282	-20.2038
CCR2	HLA-DMB	0.535	2.62349e-24	1.90799e-23	0.535	-75.4723
CCR2	HLA-DPA1	0.476	6.45454e-19	2.75394e-18	0.476	-58.3332
IL24	HLA-C	0.289	2.25769e-07	4.12835e-07	0.289	-21.2079
IL24	HLA-DQB2	-0.346	3.9284e-10	9.17583e-10	0.346	-30.0214
IL24	HLA-DQA1	0.186	0.00096947	0.00130899	0.186	-9.57733
IL24	HLA-A	0.233	3.40889e-05	5.16989e-05	0.233	-14.2395
IL24	HLA-DMA	0.265	2.2822e-06	3.76445e-06	0.265	-18.0191
IL24	HLA-DOB	0.487	7.23499e-20	3.30742e-19	0.487	-61.3909
IL24	HLA-DOA	0.168	0.00300993	0.00391535	0.168	-7.99664
IL24	HLA-F	0.181	0.00137289	0.00182292	0.181	-9.09953
IL24	HLA-G	0.159	0.00509212	0.00651791	0.159	-7.26137
IL24	HLA-DMB	0.331	2.28501e-09	5.04279e-09	0.331	-27.5631
PEX3	HLA-E	-0.504	2.20881e-21	1.15872e-20	0.504	-66.226
PEX3	HLA-DPB2	0.195	0.000553037	0.000769443	0.195	-10.3439
PEX3	HLA-C	-0.602	6.7801e-32	1.35602e-30	0.602	-99.2185
PEX3	HLA-J	-0.464	5.46109e-18	2.18444e-17	0.464	-55.3455
PEX3	HLA-DQB1	0.246	1.16431e-05	1.81746e-05	0.246	-15.7477
PEX3	HLA-DQB2	0.183	0.00123868	0.00165158	0.183	-9.24194
PEX3	HLA-DQA1	-0.269	1.51786e-06	2.5564e-06	0.269	-18.5775
PEX3	HLA-A	-0.533	3.79438e-24	2.69823e-23	0.533	-74.9723
PEX3	HLA-DMA	-0.556	1.62386e-26	1.57465e-25	0.556	-82.3932
PEX3	HLA-DOB	-0.54	6.81748e-25	5.32096e-24	0.54	-77.3146
PEX3	HLA-DRB1	-0.53	6.95306e-24	4.734e-23	0.53	-74.1613
PEX3	HLA-B	-0.469	2.4636e-18	1.02383e-17	0.469	-56.4388
PEX3	HLA-DOA	-0.34	7.90132e-10	1.78058e-09	0.34	-29.065
PEX3	HLA-DPB1	-0.183	0.00123181	0.00164928	0.183	-9.24395
PEX3	HLA-DRA	-0.292	1.58819e-07	2.97206e-07	0.292	-21.682
PEX3	HLA-DRB6	-0.464	6.14094e-18	2.42605e-17	0.464	-55.1942
PEX3	HLA-F	-0.526	1.86983e-23	1.22111e-22	0.526	-72.7942
PEX3	HLA-G	-0.481	2.25016e-19	1.00007e-18	0.481	-59.7946
PEX3	HLA-DMB	-0.418	1.55749e-14	5.03432e-14	0.418	-44.1752
PEX3	HLA-DPA1	-0.434	1.19867e-15	4.08059e-15	0.434	-47.8001
ERN1	HLA-E	0.218	0.00011161	0.000163832	0.218	-12.5755
ERN1	HLA-C	0.477	4.89899e-19	2.11848e-18	0.477	-58.7117
ERN1	HLA-DQB2	-0.335	1.50505e-09	3.34456e-09	0.335	-28.1555
ERN1	HLA-A	0.311	2.26046e-08	4.66676e-08	0.311	-24.353
ERN1	HLA-DMA	0.437	7.42163e-16	2.58143e-15	0.437	-48.4607
ERN1	HLA-DOB	0.649	1.76983e-38	7.07932e-37	0.649	-120.088
ERN1	HLA-DRB1	0.176	0.00187446	0.00246842	0.176	-8.66219
ERN1	HLA-B	0.251	7.51261e-06	1.19604e-05	0.251	-16.3514
ERN1	HLA-DRA	0.213	0.00016055	0.000231424	0.213	-12.0772
ERN1	HLA-F	0.232	3.59804e-05	5.431e-05	0.232	-14.1684
ERN1	HLA-G	0.187	0.000960788	0.00130276	0.187	-9.58421
ERN1	HLA-DMB	0.317	1.15213e-08	2.40969e-08	0.317	-25.3066
ERN1	HLA-DPA1	0.287	2.8427e-07	5.16855e-07	0.287	-20.8837
CFLAR	HLA-E	0.521	5.16418e-23	3.17796e-22	0.521	-71.4143
CFLAR	HLA-C	0.581	2.01262e-29	2.80016e-28	0.581	-91.5285
CFLAR	HLA-J	0.343	5.36316e-10	1.22586e-09	0.343	-29.6036
CFLAR	HLA-DQB2	-0.192	0.000665034	0.000913351	0.192	-10.0965
CFLAR	HLA-A	0.448	9.58188e-17	3.48432e-16	0.448	-51.35
CFLAR	HLA-DMA	0.549	8.07591e-26	6.98457e-25	0.549	-80.244
CFLAR	HLA-DOB	0.503	2.52521e-21	1.30333e-20	0.503	-66.0564
CFLAR	HLA-DRB1	0.478	3.8916e-19	1.70591e-18	0.478	-59.0242
CFLAR	HLA-B	0.523	3.97859e-23	2.49637e-22	0.523	-71.7626
CFLAR	HLA-DOA	0.217	0.000118623	0.00017333	0.217	-12.4942
CFLAR	HLA-DRA	0.547	1.46699e-25	1.23536e-24	0.547	-79.4213
CFLAR	HLA-DRB6	0.19	0.000796786	0.00108962	0.19	-9.84196
CFLAR	HLA-F	0.487	7.02273e-20	3.25692e-19	0.487	-61.4131
CFLAR	HLA-G	0.471	1.61855e-18	6.81496e-18	0.471	-57.026
CFLAR	HLA-DMB	0.355	1.26059e-10	3.10299e-10	0.355	-31.5856
CFLAR	HLA-DPA1	0.425	5.10325e-15	1.66637e-14	0.425	-45.7703
CD46	HLA-E	0.253	6.5948e-06	1.06047e-05	0.253	-16.5249
CD46	HLA-DPB2	-0.169	0.00281052	0.00367089	0.169	-8.08966
CD46	HLA-C	0.296	1.09201e-07	2.11784e-07	0.296	-22.1709
CD46	HLA-J	0.209	0.00020514	0.000294371	0.209	-11.7301
CD46	HLA-DQB2	-0.306	3.7295e-08	7.459e-08	0.306	-23.6764
CD46	HLA-A	0.248	9.99028e-06	1.5671e-05	0.248	-15.9615
CD46	HLA-DMA	0.367	2.6369e-11	6.80491e-11	0.367	-33.7746
CD46	HLA-DOB	0.268	1.73448e-06	2.89079e-06	0.268	-18.4001
CD46	HLA-DRB1	0.328	3.12862e-09	6.76459e-09	0.328	-27.1394
CD46	HLA-B	0.414	2.74036e-14	8.51373e-14	0.414	-43.4172
CD46	HLA-DRA	0.559	6.54153e-27	6.97763e-26	0.559	-83.5674
CD46	HLA-F	0.301	6.61643e-08	1.31507e-07	0.301	-22.8584
CD46	HLA-G	0.27	1.41611e-06	2.4104e-06	0.27	-18.6623
CD46	HLA-DMB	0.281	4.97868e-07	8.85099e-07	0.281	-20.1077
CD46	HLA-DPA1	0.408	7.40681e-14	2.23602e-13	0.408	-42.0241
NCKAP1	HLA-E	-0.32	7.87192e-09	1.66822e-08	0.32	-25.8371
NCKAP1	HLA-DPB2	0.188	0.000867434	0.00118119	0.188	-9.72555
NCKAP1	HLA-C	-0.45	7.77014e-17	2.85798e-16	0.45	-51.6359
NCKAP1	HLA-J	-0.279	5.76442e-07	1.01912e-06	0.279	-19.9042
NCKAP1	HLA-DQB2	0.273	1.09575e-06	1.89535e-06	0.273	-19.0091
NCKAP1	HLA-DQA1	-0.175	0.0019842	0.00260223	0.175	-8.58604
NCKAP1	HLA-A	-0.432	1.715e-15	5.77683e-15	0.432	-47.2986
NCKAP1	HLA-DMA	-0.436	7.9e-16	2.71828e-15	0.436	-48.3862
NCKAP1	HLA-DOB	-0.374	9.48322e-12	2.4874e-11	0.374	-35.2266
NCKAP1	HLA-DRB1	-0.404	1.34036e-13	3.97143e-13	0.404	-41.1954
NCKAP1	HLA-B	-0.416	2.2128e-14	7.08096e-14	0.416	-43.683
NCKAP1	HLA-DRA	-0.216	0.000124668	0.000180515	0.216	-12.4356
NCKAP1	HLA-DRB6	-0.204	0.000289916	0.000412326	0.204	-11.2439
NCKAP1	HLA-F	-0.402	1.70296e-13	4.95408e-13	0.402	-40.8764
NCKAP1	HLA-G	-0.292	1.58045e-07	2.97206e-07	0.292	-21.682
NCKAP1	HLA-DMB	-0.294	1.34105e-07	2.53927e-07	0.294	-21.9091
NCKAP1	HLA-DPA1	-0.4	2.29949e-13	6.62915e-13	0.4	-40.4562
