# Supplementary material for: Autophagy-mediated regulation patterns contribute to the alterations of the immune microenvironment in periodontitis
Source: Aging (Albany NY). 2020 Dec 3;13(1):555–77. doi: 10.18632/aging.202165 (PMC7835039; doi:10.18632/aging.202165)
Supplement: Supplementary Table 11 [file aging-13-202165-s010.xlsx]

## Sheet: table s11
Supplementary Table 11. Autophagy related genes
m6A phenotype-related genes	m6A mediated immune genes
ADGRG1	SEMA3F
SEMA3F	LTBP4
ACAP3	PML
SCAMP4	JUND
SORBS3	FGFR3
LTBP4	PGLYRP3
PML	TYMP
RNF126	MAP2K2
CASKIN2	ELN
JUND	VEGFB
EHBP1L1	RELA
HNRNPUL1	IL17RC
PLEKHH3	PLXNB1
BTBD2	PLXNB3
LSR	ESRRA
MTA1	ZYX
HCFC1R1	LRSAM1
ZNF219	NR2F6
RBM42	NFKBIB
PLEC	HRAS
FKBP8	PIK3R2
CAMSAP3	SEMA4B
AKT1S1	RXRB
SAMD4B	CBLC
GNB2	TNFRSF1A
ALDH4A1	PAK6
C9orf69	FGF11
IGSF8	TUBB3
FZR1	IRF3
SPTBN2	LTB4R
DCAF15	MAPK3
SAMD1	TANK
MAZ	ADRM1
CENPB	TGFB1
FLOT2	NLRX1
ARHGDIA	RARG
NAB2	AKT1
TFE3	PSMC6
PRRC2A	RAC3
STARD10	LRP1
HELZ2	S100A6
NFIC	SLC40A1
PRICKLE3	PDIA3
MIS12	GMFB
ZNF385A	NR3C1
ELMO3	RXRA
IER3IP1	SYTL1
ZFP36L2	PSMD3
TFAP2A	CHUK
STAT6	FLT3LG
TP53	AKT2
FLNA	TYK2
SLC6A8	HDGF
PTPA	HMGB1
CC2D1A	CD74
SMTN	RELB
PPP1CC	SDC3
TRIM3	TNFRSF25
CYB5R3	CRIM1
GPC1	TPM2
ERBB2	GRN
HSPG2	UBR1
TP73	CASP3
ITGB4	CACYBP
NUCB1	ANGPT1
TMEM126B	CX3CL1
MOV10	UBXN1
SLC2A4RG	NFYC
CITED4	CMTM6
MLST8	SHC1
BAIAP2	NGFR
SF3B4	BMP7
PPP1R14B	MAPK8
KREMEN1	OSGIN1
TMEM259	PSMC2
SLC35B3	ENG
AES	NFATC4
HES4	TEK
NECTIN2	PSME3
HSF1	PLXNA3
SH3GLB2	ITGAV
IQCB1	PLXNB2
ASPSCR1	CRLF3
FOSL2	NR1H2
SYMPK	TNFSF13B
FASN	OGFR
COL6A1	FURIN
DEAF1	S100A11
PPDPF	ILK
ZBTB45	SOCS1
GGA3	BMP1
FAM193B	S100A3
SBNO2	TLR8
CIZ1	ZC3HAV1
CDC42EP1	NCK1
EFNA3	PPP3CB
STARD3	ACVRL1
TBC1D10A	TLR7
PKP3	TIE1
MED15	JAG2
ORAI1	IL4R
ATP5D	PLSCR1
RFNG	DUOX1
ANAPC2	FGFRL1
ZNF282	CD81
FAM214B	FLT4
ARF5	UNC93B1
ATG9A	TNFSF15
FSCN1	MDK
STRN4	AGER
FGFR3	SEMA6B
PGLYRP3	CTSS
PNPLA6	SOS1
TYMP	TBK1
SLC4A2	TNFRSF18
NOTCH3	CD4
MFSD3	CYSLTR1
PXN	OXT
ADAM15	NPPC
PPP1R9B	IGF2R
MRPL4	ANGPTL2
CABIN1	NAMPT
TNFAIP8	TLR1
MAP2K2	S1PR1
NBEAL2	PLTP
DMPK	BLNK
TRIM47	APOD
ELN	PIK3CA
VEGFB	PSPN
PPP2R5D	LTBR
SLC6A9	LGMN
RELA	ANGPTL4
IL17RC	IFNAR1
PTPRF	RASGRP1
SERP1	PTPRC
C20orf27	TAPBP
SLC35A2	WNT5A
PLXNB1	PYY
TOLLIP	PSMD7
CDK10	CYLD
TNKS1BP1	TMEM173
SLC25A1	SRC
KDM6B	CSF2RB
PKM	NRAS
NPDC1	INPP5D
PLXNB3	IL1RN
GOLGA4	PGRMC2
ARF3	LTB4R2
GRINA	GMFG
ZNF276	PGLYRP1
MKNK2	RASGRP3
LARGE2	CRABP2
GAS2L1	DCK
ESRRA	ACVR1C
CAPN10	FLT3
TMEM184A	PTK2B
HMG20B	FCGRT
APRT	APOBEC3G
CEBPA	RARA
RGS14	TRIM5
EML3	KLRD1
UNC50	CXCL6
CHD3	CLEC11A
MPST	PTH1R
DOCK6	ROBO1
KIFC2	PTPN6
RANGAP1	PI15
SELO	NR2C2
BCL7B	CRABP1
LDB1	FCGR2B
CNPPD1	PSMC4
GNA11	IL7R
FAM8A1	NFYB
CRBN	SOCS3
TSPAN14	CRLF1
TRIM28	ARTN
ZYX	COLEC12
MYH14	STAT3
AP1B1	LCN12
RAD23A	FAM19A5
ZER1	BMPR1A
MAP1LC3A	CREB1
EPS8L2	MAVS
GTF3C1	FGF8
SLC25A22	PLXND1
LYSMD3	THRA
AP2A1	TNFRSF12A
LRSAM1	PTGDS
NR2F6	SLC22A17
CD151	MICB
COL18A1	ACVR2A
SCAP	VEGFA
GTPBP2	GNAI1
NFKBIB	PSMD14
IGFBP2	CCK
ARL1	ZC3HAV1L
MED12	NOS2
DLGAP4	TRPC4AP
TRAF7	MC4R
TSSC4	GPI
COPB2	MAPT
FAM127A	CMTM3
GAS1	NDRG1
WBP2	HSPA5
STXBP2	KDR
CLSTN1	GDF15
BCL7C	IL2RB
XAB2	IL18R1
ASCC3	PAK4
POLR2B	RNASEL
PCDHGA3	GSK3B
INO80E	CSF3
POM121C	PLXNC1
AGAP2-AS1	ERAP1
MLF2	DES
ZBTB7C	SHC2
CEP192	SEMA4C
CYHR1	IL1RL2
HRAS	PTGER4
EHD2
INAFM1
MAD1L1
BCL2L1
NT5C
DYRK1B
WDR1
FBLIM1
CFL2
H2AFZ
ARL14EP
MTO1
EFNB1
HMGN4
EXTL3
UPF1
HS6ST1
CDC42BPB
NECTIN1
SLC10A3
LINC00621
MINK1
NDUFA4L2
CORO1B
UBTF
WDR34
MED16
EPHB3
PRSS8
PIK3R2
SH3BGRL3
SEMA4B
NUP37
PRIM1
SREBF2
PRR14
CTDNEP1
JOSD2
SRRT
LAMB2
SLC39A13
USP8
HSPBP1
FAM188A
RFX1
PITX1
RXRB
ABR
SLC30A7
MARK2
B3GAT3
SARAF
SMPD2
FAM189B
ATG4A
SH3TC1
CDK16
TSC2
VPS26B
TMEM115
AGPAT1
DOK4
ZBTB7B
CBLC
FAM129B
EVPL
TNPO1
DMTF1
TNFRSF1A
PAK6
FAM110A
ACTR1B
RSL24D1
ARRDC1
KLK14
VASP
GYS1
AP3M1
VARS
ACTR1A
DNM1
CTSD
VPS9D1
HMGA1
UBTD1
NARS
OTUD5
NUP62
TTYH3
UBAC1
PTPN23
HGSNAT
KEAP1
CHMP1A
ARHGEF6
RTKN
DHX29
RALY
FBXO11
ZBTB7A
FBXL18
FBLN1
PRPF6
ARFGAP1
PDLIM7
MFSD10
CENPT
ANKRD49
ERF
PPP1R16A
PLD2
GTPBP1
ABCA2
RPS6KA4
SNRNP70
LMTK3
EIF4G1
SRSF1
ABHD14B
FXR1
GLT8D1
ABHD3
TPRA1
PTRF
FAM127B
MRPL2
BRAT1
INTS8
SCAF1
TOM1
SLC25A39
SNX14
C16orf58
FBXO38
BAP1
FAM98C
COMMD10
WNT10A
SSBP3
2020-09-15
MAST2
PFKL
FAAH
IGFBP4
GTF3C5
YWHAE
FOXN2
TBC1D10B
SPSB1
CUEDC1
KIAA0196
VAT1
ZBTB48
TUBGCP6
PRRG2
ARHGAP35
SLC25A11
ARMC1
PSMA1
KLC3
STARD4
BOK
LMNA
RHBDD2
TMF1
PAPOLA
OTUD6B-AS1
NABP1
PI4KB
FAM83F
PPIP5K2
HGS
DAGLB
ZNF14
FGF11
MGAT4B
IFRD2
SF3A2
FAM89B
IQGAP2
C1QTNF1
CLIP2
ZNF581
SEPN1
NCKAP1
COL6A2
KIAA1551
DMWD
CASP1
LAD1
TOP3B
GAA
PUF60
MVB12A
TPSB2
POLDIP2
NEK7
PTOV1
SLC44A2
DDX51
EPS15
LARP1
RBBP7
SBF1
ATXN2L
EXOC7
ALPL
AP5M1
COPB1
NMD3
SUCO
LPAR2
UCK1
EMILIN1
RINT1
AGRN
BANK1
ALS2CL
AGPAT2
UBE2S
TP53I13
BNIP2
TUBB3
COMTD1
IRF3
TLE2
LTB4R
BCL9L
PRKCSH
HSPA12B
KIAA1522
C9orf16
GPR34
SIGMAR1
PPM1B
POLD1
NIF3L1
UCKL1
SH3GL1
ALDH16A1
POLM
SOX18
PLPPR2
PKP1
RHOV
MAPK3
SHKBP1
TMEM126A
COPS7A
CCDC66
CHTF18
KHSRP
S100PBP
CLPTM1
TAGLN2
ATP13A2
LEMD3
CTDSP1
LINS1
GIPC1
MFSD5
WDR6
CHMP5
ABHD17A
HIF1A
2020-09-09
C8orf76
GIMAP4
TANK
ZBED1
NOL7
MED7
SLC35A1
LDOC1
RAB40C
POMP
ZRANB2
ARL6IP4
IGFBP5
PLCH2
MMP14
NIPA2
RAMP2
EXTL2
CNIH1
ZC3H13
TPSAB1
TMEM167A
GLIPR1
SLC8B1
SMARCC1
TPGS1
NOL11
IGSF9
PSMA5
RNF19B
PSMA2
PCDHGC3
FAM114A2
POC5
TCEB1
GNA15
RAB11B
TNS4
KLHL22
TNS2
PA2G4
ADRM1
SPINT1
TGFB1
ACTN4
AGTPBP1
DLX4
WRB
TRPM4
RIPK2
STAG3L3
CRTC2
POR
EVI2A
ACE
SH2D3C
NDUFB5
TSKU
DOT1L
CCNH
PRPF18
CCDC90B
ABCF3
ALG5
NELFB
LIPA
SLC52A2
CDKN1B
MTRR
PTMS
AP1M1
ZFP36L1
NFIX
C2CD5
CALML3
NADK
KLF13
RNGTT
ATN1
UGP2
PMPCB
RTN2
HS3ST6
RALGDS
STAG1
SPI1
MRPS34
PITPNM1
NLRX1
TMEM167B
RARG
AKT1
DRAP1
BET1
INTS1
PTK7
PPIL1
GPAA1
NAA10
USP21
NFKB2
PRIMPOL
TRAPPC1
RCC1L
RCBTB2
MAPKAPK3
MLH1
WIZ
HMMR
PHF23
KCTD1
WDR11
CHCHD10
ACTN1
COPS2
DMXL1
SREBF1
TXNDC9
RBM10
LLGL2
PSMC6
MRC1
PACSIN3
DBP
PEX10
SIGIRR
POLR2K
MBD3
FAM122B
FXYD1
ZDHHC12
RIN3
TELO2
ATG3
GPR65
VWA1
RAC3
NUFIP2
ZBTB17
FNDC10
PTGES2
LRP1
SPPL2B
BCAM
BCR
CCP110
THOP1
SENP3
RNF26
POT1
PRKAR1B
HSD17B11
MAP7D1
PLVAP
TTC7A
OMA1
CADPS2
DGKZ
PRKACA
GNAI2
KAZN
INTS2
PPP1R15A
DUOXA1
S100A6
LYRM5
DVL3
MDFI
MYO1C
TTC13
CCDC92
TRIP10
MAP3K6
UBE2Z
SLC40A1
INTS6L
FAM83H
TBC1D17
UAP1L1
LAMTOR1
RAVER1
PDIA3
SOX13
FCHSD2
ACADM
DERL2
SCAMP2
EIF3E
LAMA5
TNK2
SHB
TMEM120A
TLR10
FAN1
SLC35A4
PGM3
TMED10
OPLAH
FBXL6
GMFB
CCDC22
ARPC4
C3orf38
GHITM
CRIP2
FAM179B
SZRD1
ARMT1
FGL2
WDR5
ZC3H18
KATNB1
JUNB
FAM3A
MRPL1
GOLT1B
MFSD14A
SUPT6H
HR
LCAT
KLF16
MBD4
MAFK
INPP5A
PATZ1
PACS1
CYP2S1
COMMD8
GLYR1
FOXP4
MYO9B
EFHD2
SPRYD3
CTBS
ZNF615
TMEM222
RBM7
NR3C1
RXRA
C10orf88
SSH3
AP1M2
ZNF358
RHOD
DDX46
GTF2F1
RPS6KA3
SNX10
JUP
ENOPH1
TMEM54
RPS6KA1
RNF145
LSS
JKAMP
PTRH2
SLC25A40
MVK
TSPO
PTER
FBXL3
RABL6
DEXI
RHOG
ISLR
TAF1C
EGFL7
METTL5
ZNF184
MTERF3
MMP15
NAPA
ERAL1
DCTN1
CAPN1
SMAD3
ZNF302
CUL9
NINJ1
COL27A1
DMXL2
ZNF12
AIM1L
MAN1B1
SYTL1
SEC23IP
ZFHX3
VAMP7
HDAC5
PPP2R5C
USP3
ANKRD13D
MED17
SUB1
VAMP2
PSMD3
ANTXR2
CHUK
STX5
FASTKD1
MARK4
FBXW5
RB1CC1
PPP2R5E
FUT3
PRRC2B
C12orf10
FLT3LG
GHDC
CD82
ARFRP1
WNT7B
SNX6
CDC42EP5
TRIM11
TM9SF4
AMIGO2
CISD2
RCN3
TBX2
RPS27A
CSNK1G2
ADCK5
DLX3
ZZZ3
ABCB8
SAC3D1
GOLGA5
AKT2
ANO9
CSGALNACT2
CDK17
SIRPA
NUP107
OBSL1
IP6K1
SMG5
DBNDD1
ANKRD52
NCDN
ZNF468
GAMT
CWF19L2
TBX1
LDHB
NEK4
QTRT1
SLC35A5
APBA3
CHAC2
EFR3A
MLLT1
TYK2
DAG1
WDTC1
HCFC1
USP36
ADAMTSL5
MCM4
EPHX1
NUCB2
PWAR6
RALGPS2
TATDN1
C21orf91
ARFIP2
XPOT
NYNRIN
LY6E
SEC22B
CDC27
CPSF1
NBL1
IPO7
FZD1
COL1A1
ZNF296
GATSL3
ZMYND19
TVP23B
UQCRB
PYROXD1
KAT2B
PARP8
COA5
MZF1
CLEC4A
HDGF
VPS13A
POC1B
WDR89
UTP18
ZDHHC8
ATP6V0C
MPND
RYR1
TSR3
TRAF4
INF2
LENG8
HMGB1
SMNDC1
LIN52
LOC107985971
GCC2
L3MBTL3
NAPRT
DNAJC17
FUT6
TOM1L2
DENND1B
PAG1
CD74
RELB
MAP4
KCNK7
NABP2
SDC3
RNF219
LBR
CDKN2D
TAOK2
TEX264
BLOC1S1
CARM1
AKAP11
KMT2D
ZGPAT
ZNF513
AGL
IRF6
CHORDC1
EVI5L
PHYHD1
ILF3
IFT80
PSKH1
CHAF1A
LAMP1
SEC24B
KLK13
CEP120
FIP1L1
GRB7
SCNN1D
MFGE8
THAP12
SIPA1
TNFRSF25
ZNF432
MAP3K5
SCO2
BAG6
SDCBP
SPNS1
PRCC
SLC9A3
SMARCA5
GPN3
DGKQ
SUPT5H
KLK11
CPSF3
SFSWAP
TGDS
LIG1
BRMS1
ATF7IP2
BICDL2
UFM1
DPP8
LRRC45
CRIM1
LOC389906
NDUFA5
TPM2
CAPN15
HSPA13
ZFAND1
STK38L
SEPHS2
CNEP1R1
CSNK1G3
CPSF7
TXN2
N4BP2
TMEM263
ICE1
CMSS1
PKD1P1
NEURL4
CYTH1
LEMD2
GRN
UBA5
QRSL1
TFEC
HELZ
PDLIM2
SIX2
SLC48A1
PPP2R3B
STIM1
EPS8L1
LRP5
RFK
FOXN1
UMAD1
UBR1
PID1
UNC5B
BSG
GNG10
CDC34
MAF1
PPM1G
NUDT5
MVP
ZNF292
STT3B
ATAD1
MOB4
RHBDD3
FBLN2
HECTD3
TIMM21
ZUFSP
PCMT1
PINK1
HSP90B1
LOC338620
LDLR
ZNF668
C6orf132
WDR24
DEK
RAP2C
STK11IP
CASP3
SH3BP5L
ROCK2
SLC4A11
PHF20L1
MEA1
MIRLET7BHG
DRG2
GPS1
TMUB1
SCYL2
SEC62
KDELR1
CACYBP
TYRO3
SH2D3A
METTL25
SRBD1
GGT5
SLC25A10
FBXL5
MBD1
MAP1S
COL5A3
NOL6
MRPL22
MCTP1
PMS2P8
DPM1
ANGPT1
B3GNT8
THAP1
FAM65A
RASSF3
P2RY2
SDHAF3
SLC38A1
CX3CL1
PTCD2
AMD1
ABCA7
FMR1
BIRC2
TNNT1
CA11
RECQL
SLC12A2
AGAP11
LUM
GOLPH3L
GLI4
RB1
HIP1R
UBXN1
ZNF253
THY1
DNAJC5
YIPF4
EIF2A
NCKAP5L
NF2
FBXW9
SGTA
MEPCE
DCTN6
GMNN
DDIAS
MOSPD3
CLN3
TROVE2
ZNF580
ZNF428
VPS51
C6orf1
PPP2R1A
NIPSNAP3B
VANGL2
KLHDC8B
NFYC
TDP2
FAM13B
CTCF
POLD2
CMTM6
SIN3B
KLHDC3
MCMBP
PLEKHM2
CMIP
FDXR
ZNF598
CDC16
CCDC120
NAT1
MYL9
MAPK8IP3
TM9SF3
ACIN1
MYBBP1A
TBCB
POLR2E
PRPF40B
MFAP1
E2F6
LRRC40
MACROD1
SLC9A3R2
AAAS
POLL
PIP5K1C
PLD3
MZT1
MCAT
CIDEB
SELT
RGS11
ZNF148
CMTR2
YKT6
PHF6
SPTY2D1
RHBDF2
NARFL
MEN1
RGS12
FAM234A
EVI2B
AQP3
PGM5-AS1
NEDD1
SHC1
CHMP6
NGFR
TMEM86B
ANKRA2
THAP5
ZNHIT2
LMF2
R3HDM4
MORC3
GORAB
SMIM20
PRPS2
SPRED2
AP2S1
PLBD2
RAB1B
TCF7L1
ABCA5
ALMS1
WRN
UBE2M
C17orf58
CRIPT
TAF2
C19orf25
UPF2
ZFAND2B
EIF2AK3
CD7
HAUS3
TRAPPC8
RGL2
U2SURP
ALG8
TRMT13
AGGF1
VPS4B
DNPEP
AP4M1
HS2ST1
ATP2B1
VPS37B
SLC25A46
PEMT
BMP7
NCOA4
THUMPD1
ZDHHC24
GIN1
ZSWIM8
GTF2H4
ATP6AP1
TRIM29
DIS3
GALK1
TSPAN13
ZDHHC5
PDCD10
RTN4R
MAPK8
ERI3
TUBB4B
OSGIN1
CDC73
METTL18
MYO15B
DGAT1
TIA1
TYW3
ZC3H3
MAN1A2
GCA
DUSP12
ANO8
H6PD
LIG4
CKB
NKIRAS2
STARD7
MIB1
FBXO2
TSPAN4
TEF
PRPF38B
RNF123
TMEM123
DNA2
FGD1
NBN
RWDD3
EIF3J
CCNG1
SEC23A
SACM1L
PSMC2
MAGOH2P
IPO5
SLC27A4
PRR5
BBIP1
PHLDB3
SLC36A4
CCPG1
LMBRD1
ACADVL
SERPINH1
RYBP
ITGA3
ENG
ADGRL4
RASA1
CENPE
PDK2
CELSR2
NFATC4
MRPL3
THEM6
ZNF180
NDUFB3
LINC00324
AAMP
SLC46A3
TUBGCP2
UBA3
HIGD1A
GPS2
ATP6V1C1
TOP2B
TPP1
CLEC16A
MAPK7
MAT2B
MRPL47
TEK
PARD6G
RPL24
EHMT1
APH1A
CDC40
RPUSD1
EVL
SAFB
RPRD2
DEGS2
PSME3
SULT2B1
H2AFX
FBXO28
HDHD3
PSME4
ANAPC4
SEC22A
SLC37A2
SLC38A9
LYPLA1
CDYL2
RRN3
TMEM5
PRKRA
AGPAT5
PRPF31
CYP4F22
COL17A1
CBR4
ATP5F1
ARL6IP5
SAMSN1
PLXNA3
LYRM1
MICU2
LCOR
CDK1
TKFC
USP9X
C6orf136
SPOPL
SPATA20
GTF2A1
ZMPSTE24
ITGAV
MIDN
GBF1
RHBDL1
EHMT2
DUSP7
GSS
ROGDI
GPBP1
CLTB
GPR183
CCND1
PLXNB2
PCNT
TDG
D2HGDH
MCM9
PUSL1
PIM3
CCDC137
ATXN7L3
TBC1D16
PNKP
ABTB2
RAB5B
TNS1
C1orf27
KAT5
P3H3
ZFAND3
PEF1
FAM214A
SH3BP5-AS1
TM7SF2
LUC7L2
CRLF3
NAALADL1
TEFM
TMC6
ETNK1
GIMAP2
ECM1
PITPNM2
CCDC61
C11orf58
LOXL1
POLDIP3
UBXN8
SLC29A1
TRMT1
BACE2
BAG1
EPHB6
INTS5
GTPBP8
TRAPPC6B
KCTD5
IKZF5
TRIP6
SNF8
G6PD
CCT4
LINC01000
TGFB1I1
LSP1
PCNX3
PHLDA3
ZYG11B
THOC7
REPIN1
SRP9
MRPL55
H1F0
TMEM109
NOTCH1
NAGPA
ADAMDEC1
CEP44
RNF103
MCRS1
COPE
CASP7
SLC25A28
PIAS4
INSIG2
ZBTB41
RAD1
SPTSSA
LIN7B
NAA60
FBXL19
ITGB3BP
GJB3
TADA3
NAT6
MYO1D
GTF2E1
CLASRP
SGSH
YIPF6
RHBDF1
C14orf80
ARMC7
SLC12A9
EXOSC8
C2orf42
FAR2
WNT5B
SRFBP1
TMEM102
FBXW4P1
PEA15
DHX37
COLGALT1
OGDH
FCHSD1
LMNB2
SSNA1
DDHD1
PDE3B
SMARCD2
PNPLA7
SMARCC2
CCDC94
RBM12B
ZNF267
ARFGAP2
CAPZB
EBLN3P
ITGA4
GFPT1
PFN1
SEC23B
ACTL6A
DLD
PGLS
ARID4A
DNAJC9
RAD51AP1
MCM7
EOGT
NR1H2
AIM2
LY75
KRT3
GSAP
ADAT3
ST8SIA4
TMEM260
CERS4
PLEKHA4
CS
ZNF710
RNMT
RAB11FIP2
ADO
OSBP2
TRAF6
TMEM141
TMEM33
PLCXD2
RNF216
FAM96A
PPP2R2C
PEBP1
ICOSLG
CTIF
BCAS3
IMPA1
PEX3
TCEAL9
EHD1
PPRC1
SLC7A1
MIA3
REST
SMC6
FGFR1OP
ZW10
APOE
MED4
IBTK
PEX16
RPS6KA2
OCIAD2
CCDC25
CGGBP1
KPNA2
MICALL1
USP20
TNFSF13B
LARP7
NOTCH4
FBXO5
FBXO17
KIAA1143
OGFR
SSRP1
ADAMTS2
MROH6
MVD
PPP4R2
FLII
AP2A2
PPP1R10
RAB11FIP4
CNN2
ARHGEF11
COQ10B
FDX1
RNF220
RAD9A
C8orf82
DNAJC11
LOC100288675
FURIN
BLM
TMEM59
PLIN3
ZNF503
SAAL1
PPT1
MOSPD1
PPP1R37
GOLGA2P10
GATAD2A
GTF2B
SAR1B
EPS8
RAPGEFL1
VPS54
S100A11
USP5
SLC7A6OS
USP38
ARL5B
ZNF630
SLFN12
MTPN
FAM86C1
ATAD3B
MAFG
RNPEPL1
NDE1
IFIT5
ZNF71
FIBP
SLU7
NME4
HDHD2
PLEKHG5
FBRS
PLS1
GORASP1
IER5L
TOMM70
ANKRD65
SHISA5
RASA2
NDRG4
CAPRIN2
PRSS22
ZNF414
SLC35E4
FAM83G
NPRL3
C1orf35
MSANTD2
HLTF
SLFN11
FAM104A
OLFM2
RIOK2
NISCH
MAPRE3
APCDD1
ILK
XRN1
NUP133
ADD3
PTPRA
CCDC112
TMEM63B
SLC25A23
FBXL8
CEP350
LOC280665
AQR
MED25
INO80B
RBCK1
TAF9B
ST14
ASCC2
FSTL3
NNT-AS1
ATP13A3
SREK1IP1
FAM69A
TIMP3
ULK1
MTIF2
2020-03-02
SOAT1
SMURF1
B4GALNT3
LPCAT4
SVIP
BRI3BP
DNAJC19
RSBN1
MANEA
B4GALT1
VTA1
LGALS3BP
DNAJC24
PARP16
STAU2
SOCS1
KLHL15
LGALS9
GKAP1
MAML3
ALDH3B2
UBALD2
CDC42EP4
ZNF189
CPEB4
WDR18
CAPG
SNRNP27
SMPD1
ABCF1
COL7A1
CD34
C6orf120
RAB30
ZMIZ1
LY86
CEP57
UBA2
SMAD2
NUDT9
ENPP4
PPP2R2A
BAK1
BMP1
ASAH1
ZNF638
TRMT5
TBC1D4
FXR2
UHRF2
H2AFV
CD276
POMGNT1
ATG4D
EPHX3
POLE2
PPP1R13L
RAPGEF1
STIL
SKIV2L2
DIAPH1
GGTLC1
S100A3
C5orf15
PET117
LOC105379045
FAM35A
IARS
DNAAF5
SCFD2
CCNYL1
WASF2
YPEL3
LAMTOR5
ASAP3
CHN1
NUP88
ND6
ROR2
STAM
AK6
ABTB1
TRMU
DPY19L3
GRIPAP1
LACTB2
ISOC2
PPFIA3
ARPP19
LZTFL1
BCAR1
TMEM204
DBF4
NARS2
ZNF324
CYP7B1
SLC25A24
ZNF25
SLC25A17
MTMR3
CREB3L1
SERTAD1
FOXS1
RANBP3
RAB3D
PROM2
PBX2
BRIX1
PES1
PEX5
SLC35C1
LOC101929450
BCAT1
NUS1
TLR8
TCEAL1
ZC3HAV1
KCTD11
DDX28
ERCC4
KLHL2
PHYH
C6orf62
SPACA9
GIMAP7
WHSC1L1
UBE2J2
STK25
P2RY10
CRYBG3
MFSD2A
PCGF1
CACTIN
GAK
ZMIZ2
PEX12
DDX11
ACOT11
RBM15B
UBLCP1
SS18L2
SMARCD3
TSTA3
TBC1D15
LRR1
PARG
SH3PXD2A
GCFC2
DIEXF
MDH1
SOCS4
ANKMY2
CDC23
RHOC
SARNP
TINCR
TMA16
COQ10A
EIF4E
FBXO8
ZNF853
RPS6KB2
CIRBP
EEF1E1
POU3F1
NCK1
PPP3CB
FGFR1OP2
TM2D3
ZNF564
RNF167
POLQ
TMEM41B
ACVRL1
C19orf60
KIF22
TPI1
ILVBL
DDAH2
SCARF2
TRAK2
KCTD13
COX7A2L
PIDD1
PLPP2
WHRN
SPTBN1
PTENP1
UBR5
SAMD10
TJP3
CPOX
THOC6
PAPSS1
TMEM39A
METTL14
TLR7
TACC3
PRRX2
P4HB
DCN
ITPR3
SRP54
NGLY1
ASUN
CCDC124
ATP6V0A1
HPS6
FAR1
PLCB3
OSBPL7
MTR
ADNP
ANAPC13
SMARCA4
ZNF865
DMTN
FLOT1
CLDND1
YWHAQ
KDF1
AKAP17A
EBAG9
DHRS11
RRM2B
NMUR1
ANKRD46
ZNF627
PKP4
TAF6L
MSH3
ATPAF1
PRSS27
LIPT1
ASNSD1
DDX10
ATG4C
FAM173B
CILP2
MME
CCDC126
MRPL38
MAP4K2
DUS3L
PHRF1
CLDN12
PMVK
SIAH2
MEGF8
PRSS23
IDE
RAB5C
IQSEC2
RAB24
ODF2
KLHL11
CALCOCO1
UBL3
LOC100130744
LGI4
DEDD
FUNDC2
MINPP1
C16orf87
GALNT18
EHHADH
DENND4A
SULT1A2
MED22
OPA3
DHX38
PPP1R18
LAMB3
ZNF606
BICD1
PTPRO
CSNK1D
ZDHHC1
C11orf57
ALKBH5
CDC37
DNAJB5
TIE1
SIRT1
FRMD6
OMP
PCED1A
PKN1
ENKD1
SFMBT1
VPS18
FES
ZCCHC7
BTLA
TKT
LDHD
CNKSR1
FAM91A1
JAG2
LOC441081
PPP1R21
PDIK1L
SMG8
XXYLT1
ARSA
PHF12
NRGN
TCEA2
GTF2H3
VPS26A
GJB5
ACBD5
IL4R
CAMK1
WDR36
RABGGTA
RHOT1
RBBP9
PDHX
EDC4
OTUD6B
PLSCR1
STRADB
PPWD1
XPO1
BET1L
C1GALT1C1
MRC2
DUOX1
BTN2A1
DCLRE1C
KMO
CLPP
DARS2
PSMD6-AS2
ALKBH1
AP5B1
TRMT10C
BTAF1
GRAMD1C
ADGRA2
RAB27A
SNCG
MTG1
RAD17
KIF2A
SULT1A1
ALG6
HCCS
BIRC6
ADAD2
TCOF1
ZNF211
NDC1
TIMM50
PARP2
BTBD1
TBCA
FGFRL1
C12orf4
MFAP4
BHLHE23
[truncated: 2,311 more rows]
