# Supplementary material for: Autophagy-mediated regulation patterns contribute to the alterations of the immune microenvironment in periodontitis
Source: Aging (Albany NY). 2020 Dec 3;13(1):555–77. doi: 10.18632/aging.202165 (PMC7835039; doi:10.18632/aging.202165)
Supplement: Supplementary Table 13 [file aging-13-202165-s012.xlsx]

## Sheet: Sheet1
Supplementary Table 13. The full list of difference of biological process between the two subtypes with de-redundancy for GO terms for GSEA.
ID	Description	setSize	enrichmentScore	NES	pvalue	p.adjust	qvalues	rank	leading_edge	core_enrichment
GO:0006413	GO:0006413	translational initiation	159	-0.402911	-1.64347	0.00208768	0.0161659	0.00949835	5357	tags=45%, list=26%, signal=34%	RPS17/RPS7/CDC123/HABP4/RPL9/EIF2D/RPLP2/RPS23/RPL23A/RPL37/RPL39/NCBP2/RPS28/IMPACT/EIF1B/DHX33/EIF4G3/EIF5/RPL41/RPL37A/RPL31/EIF3C/ALKBH1/RPS21/RPL24/RPL7/DENR/EIF3L/EIF3H/DDX1/EIF2AK4/EIF2S2/METTL3/TPR/RPS29/COPS5/EIF5B/RPL15/RPS27/RPL36A/NPM1/EIF2AK2/PAIP1/UHMK1/PAIP2/EIF1AX/EIF2S1/RPS6KB1/EIF3M/EIF2AK3/YTHDF3/EIF3F/MCTS1/EIF2A/EIF3E/PPP1R15B/RBM4/EIF3J/MTIF2/NCK1/DNAJC3/RPL27A/EIF4E/FMR1/RP…
GO:0000819	GO:0000819	sister chromatid segregation	150	-0.390997	-1.58387	0.0021097	0.0161659	0.00949835	4641	tags=47%, list=22%, signal=37%	CDC6/KIF2C/RAD51C/IK/HORMAD1/TRIP13/NCAPH/RAB11A/SLF2/PRC1/NCAPG/ATM/KIF23/SLF1/RAN/RMI2/NCAPD3/SMC3/CHAMP1/NAA50/CHMP2B/NSMCE2/CENPF/DYNC1LI1/KIF18A/TPR/PDS5B/SEH1L/APC/ZWINT/GEN1/FBXW7/KIF4A/BUB3/SPDL1/KNSTRN/HNRNPU/ATRX/CTCF/PDS5A/BUB1B/SGO2/SMC5/WAPL/NIPBL/KIF14/ZW10/RAD21/CDC27/RIOK2/STAG2/SMC2/FBXO5/CDC23/CCNB1/PIBF1/MAD2L1/RB1/NDC80/ZNF207/MCMBP/RACGAP1/CUL3/CHMP5/VPS4B/CENPE/SMC4/TTK/MIS1…
GO:0098813	GO:0098813	nuclear chromosome segregation	207	-0.363497	-1.5337	0.00214592	0.016345	0.00960356	4641	tags=40%, list=22%, signal=31%	CDC6/TERF1/KIF2C/RAD51C/IK/HORMAD1/TRIP13/NCAPH/RAB11A/SLF2/PRC1/NCAPG/ATM/KIF23/SLF1/RAN/RMI2/NCAPD3/SMC3/CHAMP1/NAA50/CHMP2B/NSMCE2/CENPF/DYNC1LI1/ECT2/KIF18A/TPR/SPICE1/GEM/PDS5B/SEH1L/MEI1/CENPQ/APC/ZWINT/GEN1/FBXW7/KIF4A/BUB3/SPDL1/ACTR3/KNSTRN/HNRNPU/ATRX/CTCF/UBE2B/PDS5A/BUB1B/SGO2/SMC5/WAPL/NIPBL/KIF14/ZW10/RAD21/MLH1/NDC1/CDC27/FAM83D/RIOK2/STAG2/SMC2/FBXO5/CDC23/CCNB1/PIBF1/MAD2L1/RB1/N…
GO:0051607	GO:0051607	defense response to virus	209	-0.36343	-1.53738	0.0021097	0.0161659	0.00949835	3346	tags=30%, list=16%, signal=26%	IL1B/POLR3F/DDX1/EIF2AK4/TRIM44/IFNA17/SEC14L1/KCNJ8/TRIM5/TSPAN6/RNASEL/IFNL2/CNOT7/DHX36/IL15/EIF2AK2/TRIM6/NT5C3A/TRIM22/IFI44L/TLR7/PMAIP1/SERINC5/DDX21/ELMOD2/IL33/RNF125/CXCL10/EXOC1/TBK1/APOBEC3G/PUM2/ZMPSTE24/RTP4/IFI16/ZC3HAV1/ITCH/IFNAR2/HERC5/ABCE1/DTX3L/BIRC3/TLR8/GBP1/AIMP1/APOBEC3B/IFIT5/RNASE6/TLR3/PLSCR1/MICB/DNAJC3/PPM1B/BIRC2/DDX60/AIM2/FGL2/SLFN11/MMP12/CXCL9/PTPRC/GBP3
GO:0090305	GO:0090305	nucleic acid phosphodiester bond hydrolysis	239	-0.335029	-1.43802	0.00424628	0.0247765	0.0145575	3674	tags=28%, list=18%, signal=24%	HARBI1/APAF1/ZC3H12C/RPA3/GTF2H1/RNASEH2B/ERCC5/NUDT21/CUL4B/DDX1/RPP40/ERN1/EXD2/CHD1L/DICER1/XPA/RNASEL/TATDN3/PCF11/CNOT7/UTP23/CSTF3/DCLRE1A/PGAP1/GEN1/C11orf80/PCNA/PNRC2/RAD1/RFC3/DCP2/RFC1/CNOT6/EXO1/ERCC4/MGME1/DROSHA/RFC5/DBR1/CPSF6/CPSF2/TSNAX/PNPT1/REV3L/DNA2/RFC4/CPSF3/EME1/PAN3/POLK/FAN1/TDP2/GTF2H3/RNASE6/CASP3/DIS3/HMGB1/RBBP8/XRN1/WRN/DCLRE1C/TATDN1/ENPP2/N4BP2/LACTB2/RPS27A/ZC3H1…
GO:0010389	GO:0010389	regulation of G2/M transition of mitotic cell cycle	175	-0.329803	-1.3565	0.0128205	0.0466207	0.0273922	4546	tags=40%, list=22%, signal=32%	PSMD11/CTC1/RAD51C/PSMF1/CETN2/TPX2/PSMD6/RAB11A/CEP41/SKP1/ATM/APP/HAUS2/DONSON/TAOK1/PSMC1/PSMB7/WNT10B/RNASEH2B/TUBB4A/YWHAG/CENPF/CNTRL/USP47/PSMA4/PSMD10/PLK4/SYF2/PSMD7/PSMD14/PSMD12/AURKA/CEP70/PKIA/HSP90AA1/DTL/PCM1/FGFR1OP/HAUS1/PSMA2/KIF14/RAD21/PSMA1/PSMA5/CEP78/HAUS6/CDC7/NAE1/CCP110/PSME4/CEP76/FBXO5/CCNB1/PSMC2/CEP57/NBN/OFD1/ALMS1/PSMC6/NEDD1/RINT1/DYNC1I2/VPS4B/BLM/PRKAR2B/CDK1/HA…
GO:0065004	GO:0065004	protein-DNA complex assembly	178	-0.327001	-1.34654	0.0127389	0.0466207	0.0273922	4291	tags=34%, list=21%, signal=27%	CETN2/HIST1H4H/UBB/RSF1/OIP5/GTF2A2/MNAT1/HEY2/ANP32B/NAP1L2/WNT10B/HIST1H2BC/RPA3/GTF2H1/TSPYL4/ERCC5/CUL4B/CENPF/RNF4/TSPYL1/CAND1/RAD23B/CHD1L/HJURP/CDK7/NAP1L1/ATF7IP/XPA/GTF3C3/CENPQ/CENPU/NPM1/CENPL/ATRX/CREB1/NAP1L5/TCF4/NAP1L3/GTF2B/RBBP7/PIAS1/HAT1/SPTY2D1/SENP6/CENPC/ASF1A/CCNH/RB1/GTF2H3/GMNN/SMARCA5/HMGB1/ITGB3BP/RRN3/CENPE/RPS27A/MIS12/SHPRH/CENPK
GO:0000086	GO:0000086	G2/M transition of mitotic cell cycle	224	-0.322818	-1.37472	0.00849257	0.0372502	0.0218865	4546	tags=39%, list=22%, signal=31%	PSMD11/PLCB1/CTC1/PPP1R12A/RAD51C/PSMF1/CETN2/TPX2/PSMD6/CHEK2/RAB11A/CEP41/SKP1/ATM/APP/MNAT1/HAUS2/DONSON/TAOK1/PSMC1/PSMB7/WNT10B/USH1C/RNASEH2B/TUBB4A/YWHAG/CENPF/CNTRL/USP47/PSMA4/PSMD10/PLK4/SYF2/CDK7/PSMD7/PSMD14/PSMD12/AURKA/CEP70/PKIA/HSP90AA1/DTL/PPM1D/ABCB1/PCM1/FGFR1OP/BORA/HAUS1/PSMA2/KIF14/RAD21/CCNA2/PSMA1/PSMA5/PPP1CB/CEP78/HAUS6/CDC7/NAE1/MELK/CCP110/TAF2/PSME4/PPP2R2A/CEP76/FBXO…
GO:0006260	GO:0006260	DNA replication	243	-0.320443	-1.37951	0.00420168	0.0247331	0.014532	2555	tags=26%, list=12%, signal=23%	SDE2/BOD1L1/BARD1/TIPIN/GEN1/ORC2/POLA1/RBBP6/FBXW7/KIN/RRM2/ATRX/DTL/PCNA/RAD1/PDS5A/RFC3/WAPL/RFC1/EXO1/REV1/GINS1/ORC3/MGME1/RBBP7/RFC5/CCNA2/ZBTB38/REV3L/ZMPSTE24/CDC7/ATR/CCNE2/STAG2/CACYBP/DNA2/RFC4/POLI/FBXO5/ORC4/ORC6/RAD17/ETAA1/CCDC88A/POLK/E2F8/MCM9/NBN/MCMBP/GMNN/TOPBP1/POLE2/DBF4/RBBP8/WRN/PRIM1/LIG4/RMI1/RRM2B/BLM/PRIMPOL/SLFN11/CDK1
GO:0006281	GO:0006281	DNA repair	457	-0.320266	-1.47416	0.00231481	0.017179	0.0100936	4289	tags=36%, list=21%, signal=29%	UCHL5/USP28/PARP9/COPS3/CETN2/HIST1H4H/INO80D/UBB/ATXN3/ASTE1/TRIP13/CDC5L/CHEK2/HINFP/RNF113A/SLF2/ZNF365/HMGN1/XRCC5/TFIP11/ACTR8/ATM/PTTG1/SLF1/MNAT1/XRCC4/BRCA2/ALKBH1/HELB/RHNO1/SMC3/TAOK1/COPS4/GADD45A/USP7/SFR1/POLG2/ZBTB1/SUMO1/RPA3/GTF2H1/ERCC5/CUL4B/DDX1/NSMCE2/XRCC2/UBE2D3/PARP4/UHRF1/PARPBP/EXD2/PAXIP1/USP47/FANCI/RAD23B/UBE2W/MORF4L1/HUS1/USP45/FIGNL1/RNF169/PARK7/ASCC1/CHD1L/COPS7B/…
GO:0043632	GO:0043632	modification-dependent macromolecule catabolic process	467	-0.313759	-1.44431	0.00233645	0.017179	0.0100936	4476	tags=39%, list=21%, signal=31%	RNF139/ARIH1/DDIT3/PSMF1/USP13/USP30/PELI1/UCHL5/USP28/TOPORS/DET1/RNF144B/UBB/PCYOX1/ATXN3/PSMD6/TLK2/FAM122A/TSG101/CD2AP/NUB1/TOM1L1/SKP1/USP14/PLK2/UCHL3/PTTG1/FBXL2/MARCH6/UBE2E1/PSMC1/USP31/SENP1/PSMB7/ANAPC7/USP7/MDM2/PYHIN1/WNT10B/UBA6/SUMO1/UBR3/FBXO9/RNF34/UBQLN2/TRIM38/FBXO21/USP24/UBE2D3/RNF4/UHRF1/C17orf97/CCDC47/FBXO33/RFFL/RNF103/USP47/PSMA4/RAD23B/UBE2W/USP33/MAPK9/PSMD10/USP45/FB…
GO:0019941	GO:0019941	modification-dependent protein catabolic process	463	-0.313017	-1.43994	0.002331	0.017179	0.0100936	4476	tags=39%, list=21%, signal=32%	RNF139/ARIH1/DDIT3/PSMF1/USP13/USP30/PELI1/UCHL5/USP28/TOPORS/DET1/RNF144B/UBB/PCYOX1/ATXN3/PSMD6/TLK2/FAM122A/TSG101/CD2AP/NUB1/TOM1L1/SKP1/USP14/PLK2/UCHL3/PTTG1/FBXL2/MARCH6/UBE2E1/PSMC1/USP31/SENP1/PSMB7/ANAPC7/USP7/MDM2/PYHIN1/WNT10B/UBA6/SUMO1/UBR3/FBXO9/RNF34/UBQLN2/TRIM38/FBXO21/USP24/UBE2D3/RNF4/UHRF1/C17orf97/CCDC47/FBXO33/RFFL/RNF103/USP47/PSMA4/RAD23B/UBE2W/USP33/MAPK9/PSMD10/USP45/FB…
GO:0006511	GO:0006511	ubiquitin-dependent protein catabolic process	459	-0.312514	-1.44033	0.00231481	0.017179	0.0100936	4476	tags=39%, list=21%, signal=31%	RNF139/ARIH1/DDIT3/PSMF1/USP13/USP30/PELI1/UCHL5/USP28/TOPORS/DET1/RNF144B/UBB/ATXN3/PSMD6/TLK2/FAM122A/TSG101/CD2AP/NUB1/TOM1L1/SKP1/USP14/PLK2/UCHL3/PTTG1/FBXL2/MARCH6/UBE2E1/PSMC1/USP31/SENP1/PSMB7/ANAPC7/USP7/MDM2/PYHIN1/WNT10B/UBA6/SUMO1/UBR3/FBXO9/RNF34/UBQLN2/TRIM38/FBXO21/USP24/UBE2D3/RNF4/UHRF1/C17orf97/CCDC47/FBXO33/RFFL/RNF103/USP47/PSMA4/RAD23B/UBE2W/USP33/MAPK9/PSMD10/USP45/FBXO4/UBE…
GO:0071103	GO:0071103	DNA conformation change	243	-0.308703	-1.32897	0.012605	0.0463399	0.0272272	4291	tags=30%, list=21%, signal=24%	CETN2/HIST1H4H/UBB/NCAPH/RSF1/OIP5/XRCC5/NCAPG/HHEX/MNAT1/HELB/NCAPD3/NCAPG2/ANP32B/MCM6/MTERF1/NAP1L2/HIST1H2BC/GTF2H1/TSPYL4/SMARCA1/CUL4B/DDX1/TSPYL1/TPR/RAD23B/ASH1L/CHD1L/HJURP/NAP1L1/XPA/CENPQ/CENPU/DHX36/NPM1/CENPL/TOP2A/ATRX/NAP1L5/CTCF/RAD54B/SRPK1/GINS1/NAP1L3/RBBP7/DNA2/SMC2/PSME4/HAT1/SPTY2D1/CCNB1/HNRNPA2B1/CHD1/CENPC/ASF1A/MCM9/GTF2H3/SMCHD1/NBN/SMARCA5/HMGB1/WRN/ITGB3BP/TOP2B/POT1/…
GO:0022613	GO:0022613	ribonucleoprotein complex biogenesis	313	-0.297357	-1.31464	0.0139211	0.0481186	0.0282723	3964	tags=30%, list=19%, signal=25%	GEMIN2/ATM/MPHOSPH10/PRMT5/RAN/G3BP2/LSM14A/RPL7/SNRPC/DENR/NVL/EIF3L/UTP3/EIF3H/DIMT1/SRSF10/GEMIN6/NIP7/PTGES3/NUDT21/NSA2/CUL4B/DDX1/SHQ1/WDR3/ERI1/ZNHIT6/KRR1/GNL2/DDX31/RC3H1/DICER1/UTP18/RPS27/RNASEL/GTF3A/GEMIN5/CNOT7/UTP23/NPM1/DDX52/DDX20/WDR75/HSP90AA1/C9orf72/HEATR1/TRMT61B/PTEN/SRSF6/CNOT6/PSIP1/CEBPZ/EIF2S1/DDX21/WDR36/RIOK1/SNRPG/DROSHA/EIF3M/CPSF6/GCFC2/RIOK2/EIF3F/PUM2/SLU7/SF3B1/…
GO:0002757	GO:0002757	immune response-activating signal transduction	475	-0.290786	-1.33818	0.00462963	0.0268899	0.0157993	3263	tags=25%, list=16%, signal=22%	CTSL/S100A8/IRAK3/LYN/NCKAP1L/UBE2D3/CR2/IGKC/DUSP22/CD3D/SEC14L1/PSMA4/PSMD10/TRAF6/PRKCB/PIK3C3/RC3H1/MAP3K7/ELF1/TRIM5/TSPAN6/CASP8/RC3H2/TLR2/APPL1/TRAC/PSMD7/PSMD14/CD47/LPXN/WDFY1/PSMD12/IGLV1-44/TIFA/FCGR2A/PIK3R1/KRAS/TRAT1/HSP90AA1/KLHL6/ACTR3/UBQLN1/PDE4B/CTSK/FCRL3/LGMN/TLR7/NRAS/CYFIP1/BRK1/UBE2D1/MALT1/ITK/BCL10/THEMIS/PJA2/PSMA2/C3AR1/RIPK2/PTPN2/TAB2/IGLC1/YES1/RNF125/PSMA1/PSMA5/E…
GO:0051090	GO:0051090	regulation of DNA-binding transcription factor activity	398	0.28962	1.28974	0.0138408	0.0479715	0.0281858	3244	tags=24%, list=16%, signal=21%	FLNA/FOSL1/CARM1/JUP/TGFB1/MDFI/NFKB2/FLOT2/SIGIRR/FZD1/CSF3/AKT1/RELA/CCDC22/ZBTB7A/BHLHE40/RIPK4/CX3CL1/PRKD2/PYCARD/MEN1/CRTC2/TMEM173/BRMS1/ICAM1/ID1/FOS/CAPN3/MAPK3/SMARCA4/KLF4/RBCK1/FLOT1/KEAP1/NUPR1/BMP7/SMAD3/STAT3/LGALS9/VEGFA/SPHK1/ARRB2/FAF1/TRIB1/CACTIN/NFKBIL1/CHP1/FOXS1/RPS6KA4/MAPK11/PIAS4/CTNNBIP1/SMO/HDAC5/AGER/SIK1/TRAF2/PINK1/HMOX1/SMAD7/RAB7B/FOXP3/ITGB2/RNF25/MAVS/PRKCZ/NFKB…
GO:0010975	GO:0010975	regulation of neuron projection development	432	0.289948	1.29729	0.0137694	0.0479715	0.0281858	2381	tags=18%, list=11%, signal=16%	ARHGDIA/CARM1/ACAP3/PTPRF/KREMEN1/SF3A2/MARK2/NDRG4/ANAPC2/KATNB1/BAIAP2/MOV10/FZD1/MDK/APOE/PLXNB3/GRN/AKT1/CRABP2/AP2A1/EPHB3/THY1/ITGA3/ARHGAP35/TNFRSF12A/PLXNA3/CX3CL1/SFRP1/NGFR/ABL1/ID1/DVL3/KLF4/NFATC4/STK25/CFL1/RAPGEF1/BMP7/DVL1/LRP1/ARHGAP4/GAK/MAPT/ILK/STMN2/SERPINF1/TRPV4/VEGFA/CUX1/FES/MEGF8/MOB2/RTN4RL1/PTK2B/RTN4R/CDC20/GDI1/PTK7/SMURF1/DPYSL3/METRN/FOXO6/TRAK1/PLXNB2/PTPRS/GORASP1…
GO:0062012	GO:0062012	regulation of small molecule metabolic process	404	0.291979	1.30011	0.0104167	0.0408951	0.024028	3268	tags=24%, list=16%, signal=20%	IGFBP4/NUP62/TP53/LSS/TSPO/LDLR/TGFB1/IGFBP5/TM7SF2/POR/POM121C/PSMD3/APOE/FASN/AKT1/NR1H2/CDA/ZBTB7A/SCAP/AP2A1/SREBF2/NFYC/ACADVL/C1QTNF2/MVD/PPP1CA/C1QTNF1/SREBF1/PSME3/SCD/EPHX2/AKT2/WDTC1/EIF6/AAAS/SHMT2/BAD/MIDN/NUPR1/MID1IP1/WDR5/FAM3A/STAT3/SLC25A23/MVK/NOS3/PMVK/DGKQ/PSMB6/PID1/PTK2B/COMT/ADIPOR1/SIK1/OAZ2/PDK2/NCOR2/SP1/PINK1/PPIF/VDR/PGP/PSMB10/PTH1R/WNT4/RHOA/ERLIN2/GSTZ1/JMJD8/PSMD8/…
GO:1901615	GO:1901615	organic hydroxy compound metabolic process	471	0.292032	1.31549	0.00877193	0.0380187	0.022338	4325	tags=28%, list=21%, signal=22%	ALDH3B2/TP53/EPAS1/LSS/CEBPA/LDLR/PLTP/DUOX1/TM7SF2/SULT2B1/CYB5R3/G6PD/POR/FDXR/DUOXA1/APOE/DEGS2/FASN/GIPC1/SCAP/SREBF2/NFYC/DGAT1/PLCH2/ACADVL/INPP5A/STARD3/MVD/ITPKC/SREBF1/SCD/ACLY/EPHX2/CDH3/SULT1A1/IMPA2/CYP11A1/DHCR24/RXRA/MVK/SPHK1/ALDH2/PLCB3/SORD/SGPP2/PMVK/DGKQ/PLCD1/LCAT/PTK2B/COMT/PIAS4/SULT1A2/HSD3B7/INPP5D/ISYNA1/OSBPL5/SP1/SNX17/IP6K1/GALK1/OSBPL7/VDR/PGP/HAGH/PLCD3/PTH1R/CEL/ITG…
GO:0006914	GO:0006914	autophagy	447	0.295598	1.32405	0.00878735	0.0380187	0.022338	2541	tags=23%, list=12%, signal=20%	ITGB4/TP53/MVB12A/MARK2/LARP1/TSPO/EIF4G1/HSPB1/MAP1S/MAP1LC3A/ATP13A2/ATP6V0C/CAPNS1/ATG9A/VPS37B/AKT1/MLST8/VPS51/PIK3R2/TBC1D17/WDR24/CDC37/SNRNP70/TSC2/SREBF2/SUPT5H/TOLLIP/KLHL22/LRSAM1/USP36/ATP6V0D1/TCIRG1/WDR6/VPS28/RAB24/TP53INP2/PYCARD/HGS/TMEM173/RAB1B/ABL1/EXOC7/SREBF1/MAPK3/LAMTOR1/CLN3/TOMM22/BOK/LAMTOR4/BAD/NUPR1/CTSA/PLK3/KAT5/CSNK2B/FIS1/STAT3/PHF23/MFN2/PRKACA/VDAC1/MAPT/CHMP6/S…
GO:0061919	GO:0061919	process utilizing autophagic mechanism	447	0.295598	1.32405	0.00878735	0.0380187	0.022338	2541	tags=23%, list=12%, signal=20%	ITGB4/TP53/MVB12A/MARK2/LARP1/TSPO/EIF4G1/HSPB1/MAP1S/MAP1LC3A/ATP13A2/ATP6V0C/CAPNS1/ATG9A/VPS37B/AKT1/MLST8/VPS51/PIK3R2/TBC1D17/WDR24/CDC37/SNRNP70/TSC2/SREBF2/SUPT5H/TOLLIP/KLHL22/LRSAM1/USP36/ATP6V0D1/TCIRG1/WDR6/VPS28/RAB24/TP53INP2/PYCARD/HGS/TMEM173/RAB1B/ABL1/EXOC7/SREBF1/MAPK3/LAMTOR1/CLN3/TOMM22/BOK/LAMTOR4/BAD/NUPR1/CTSA/PLK3/KAT5/CSNK2B/FIS1/STAT3/PHF23/MFN2/PRKACA/VDAC1/MAPT/CHMP6/S…
GO:0040017	GO:0040017	positive regulation of locomotion	492	0.296486	1.34045	0.00519931	0.029065	0.0170772	3246	tags=23%, list=16%, signal=20%	CD74/COL1A1/HRAS/MAZ/FLNA/PFN1/ACTN4/PLVAP/TGFB1/COL18A1/RAB25/HSPB1/IGFBP5/GNAI2/CD151/ZNF580/DUOX1/TRIP6/MMP14/MDK/VPS37B/GRN/RHOD/AKT1/GRB7/GPI/CLDN7/FAM89B/WNT5B/THY1/ITGA3/CALR/MYO1C/PRKD2/MYADM/PYCARD/ROR2/ABL1/TNFRSF18/ICAM1/MAPK3/AKT2/FAM83H/BMP7/SMAD3/SERPINE1/STAT3/LGALS9/CORO1A/LRP1/DMTN/TMEM102/ILK/RHOC/AAMP/TRPV4/VEGFA/CCL21/SPHK1/NOS3/DIAPH1/MEGF8/CXCL14/RAC1/ZNF703/IL6R/PTK2B/NOTCH…
GO:0050865	GO:0050865	regulation of cell activation	495	0.298063	1.34641	0.00527241	0.029065	0.0170772	3149	tags=23%, list=15%, signal=20%	ZFP36L2/ERBB2/IGFBP2/CD74/EMILIN1/CLPTM1/ZFP36L1/CEBPA/MAD1L1/ABR/LAMP1/LDLR/TGFB1/FLOT2/FOXN1/STAT6/SOX13/MMP14/NECTIN2/PKN1/MDK/APOE/GRN/CD81/BCR/AKT1/CD177/PRKCD/EFNB1/ZBTB7B/THY1/FLT3LG/SUPT6H/AP3D1/CX3CL1/CD276/STXBP2/CD9/SFRP1/RPS6KA1/PYCARD/C1QTNF1/C1QA/ABL1/TNFRSF18/CAPN3/IL4R/PTPN6/BAD/MIF/CDKN1A/LGALS9/ZBTB16/CORO1A/DMTN/IL1RL2/SDC4/RARA/CCL21/SPHK1/NOS3/FES/TYRO3/ZMIZ1/PRAM1/RAC1/SOX15…
GO:0060627	GO:0060627	regulation of vesicle-mediated transport	449	0.298307	1.33884	0.00524476	0.029065	0.0170772	3479	tags=26%, list=17%, signal=22%	GAS1/MAP2K2/VAMP2/ACTN4/ABR/LAMP1/RAB11B/TGFB1/RAB25/NDRG4/GNAI2/CD151/ATP13A2/ATP6AP1/PTPN23/EZR/CPLX1/APOE/DNM1/BCR/NR1H2/GIPC1/CD177/AP2S1/SH3GL1/AP2A1/EHD2/TSC2/PACSIN3/LRSAM1/CALR/STXBP2/ABCA7/VPS28/ANKRD13D/PYCARD/HGS/EHD1/ABL1/IL4R/MAPK3/AKT2/FLOT1/SIRPA/RAPGEF1/BET1L/MICAL1/PROM2/DVL1/SERPINE1/LGALS9/CORO1A/LRP1/ARHGAP1/ANKRD13B/SDC4/VEGFA/CCL21/SPHK1/SNF8/FES/PRRT2/HIP1R/ARRB2/GRIPAP1/DG…
GO:0009896	GO:0009896	positive regulation of catabolic process	373	0.298415	1.31996	0.0103806	0.0408797	0.024019	2513	tags=21%, list=12%, signal=19%	ZFP36L2/ZFP36L1/CEBPA/LARP1/LDLR/BAG6/MOV10/EZR/HSF1/FZR1/RAD23A/APOE/CD81/AKT1/CCDC22/PRKCD/CDC37/CSNK1D/TSC2/BAX/SUPT5H/PACSIN3/LRSAM1/VPS28/GTPBP1/KHSRP/TP53INP2/TMEM173/GGA3/UPF1/NDUFA13/ZFP36/MAPK3/HSPBP1/DNAJB2/AKT2/SGTA/BAD/KEAP1/FURIN/NUPR1/PLK3/KAT5/DVL1/STX5/MFN2/LRP1/STUB1/ULK1/SNF8/USP5/FAF1/TRIB1/PTK2B/GGA1/PLK1/ADRA2A/OAZ2/SMURF1/RHBDD3/PLEKHN1/PINK1/HMOX1/OSBPL7/SMAD7/CLEC16A/SH3RF…
GO:0043087	GO:0043087	regulation of GTPase activity	382	0.299463	1.32745	0.00868056	0.0379439	0.0222941	2654	tags=23%, list=13%, signal=20%	ERBB2/ARHGDIA/HRAS/ACAP3/ABR/VPS9D1/RANGAP1/RGS14/RTKN/TBC1D10B/PLXNB1/RHOG/PLXNB3/ALS2CL/BCR/EPHB3/TSC2/THY1/GPS1/AGRN/SIPA1/SBF1/EPHA2/ARHGAP35/ARHGEF11/MYO9B/ARFGAP1/SFRP1/PYCARD/PKP4/GPS2/ICAM1/AGAP11/DVL3/LLGL2/AKT2/RGS11/RAPGEF1/EVI5L/PLEKHG6/PROM2/FGD1/ARHGAP23/ASAP3/TBC1D2/ARHGAP1/RIN3/ARHGAP4/CCL21/RANBP3/SH3BP1/ARHGEF19/ARRB2/ARHGEF16/PIN1/RIN1/ARHGAP30/PIP5K1A/PTK2B/TNK2/RTN4R/SGSM2/GD…
GO:1901653	GO:1901653	cellular response to peptide	339	0.299557	1.31427	0.0138169	0.0479715	0.0281858	2195	tags=19%, list=11%, signal=17%	TP53/VAMP2/ZFP36L1/TGFB1/PXN/RANGAP1/GNAI2/BAIAP2/ATP6AP1/APRT/HSF1/ATP6V0C/POR/GSTP1/LDOC1/AKT1/RELA/PRKCD/PIK3R2/ZBTB7B/SHC1/TSC2/ATP6V0D1/TCIRG1/MYO1C/SMARCC1/UCP2/NGFR/MEN1/AGTRAP/PTPRA/SREBF1/ICAM1/ID1/MAX/KLF4/AKT2/WDTC1/ESRRA/FIS1/STAT3/EIF4EBP1/LRP1/PRKACA/ASS1/DDX11/PRKAR1B/TRIM41/PID1/SOCS1/BCAR1/HDAC5/ADCY9/ADIPOR1/AGER/ATP6V0A1/PDK2/SP1/BCL2L2/ADCY6/BAIAP2L1/NCOA5/CAPN10/PRKCZ
GO:0043434	GO:0043434	response to peptide hormone	383	0.300897	1.33617	0.00517241	0.029065	0.0170772	2569	tags=20%, list=12%, signal=17%	JUND/COL1A1/BSG/VAMP2/ZFP36L1/TGFB1/PXN/RANGAP1/IGFBP5/GNAI2/BAIAP2/ATP6AP1/APRT/HSF1/ATP6V0C/POR/GSTP1/AKT1/RELA/PRKCD/SCAP/PIK3R2/ZBTB7B/SHC1/TSC2/ATP6V0D1/TCIRG1/MYO1C/SMARCC1/UCP2/MEN1/TRIM16/AGTRAP/PTPRA/SREBF1/ICAM1/MAX/AKT2/WDTC1/EIF6/ESRRA/BMP7/STAT3/EIF4EBP1/PRKACA/CYC1/TRPV4/ASS1/PRKAR1B/PID1/SOCS1/BCAR1/HDAC5/ADCY9/ADIPOR1/HSD11B2/ATP6V0A1/TIMP1/PDK2/SP1/ADCY6/DAG1/BAIAP2L1/NCOA5/OXT/C…
GO:0045787	GO:0045787	positive regulation of cell cycle	343	0.302616	1.33046	0.0120275	0.044997	0.0264381	3165	tags=25%, list=15%, signal=22%	FOSL1/CARM1/TNKS1BP1/NUP62/TP53/ZNF385A/EIF4G1/TGFB1/HSF1/CCND1/RAD23A/AKT1/GIPC1/TP73/PML/BAX/FLT3LG/CALR/CDK10/NUMA1/SOX4/CITED2/CNOT3/ABL1/PKP4/ZBTB17/TFDP1/HCFC1/CDC25B/LRP5/PPP1R10/MIF/MUC1/CDKN1A/PLK3/EIF4EBP1/PRKACA/MEPCE/RARA/WIZ/SPHK1/DDX11/POLDIP2/TGM1/XRCC3/SOX15/MYBBP1A/RAB11FIP4/SMARCD3/FGF8/SSTR5/HSPA2/NSFL1C/TGFA/WNT4/MECP2/HSP90AB1/H2AFY/MAPRE3/PAF1/RHOA/CDK5R2/PRMT1/PIDD1/OVOL1/C…
GO:0051272	GO:0051272	positive regulation of cellular component movement	476	0.302897	1.3645	0.00176056	0.0150942	0.00886863	4340	tags=31%, list=21%, signal=25%	CD74/COL1A1/HRAS/MAZ/FLNA/PFN1/ACTN4/PLVAP/TGFB1/COL18A1/RAB25/HSPB1/IGFBP5/GNAI2/CD151/ZNF580/DUOX1/TRIP6/TRPM4/MMP14/MDK/GRN/RHOD/AKT1/GRB7/GPI/CLDN7/FAM89B/WNT5B/THY1/ITGA3/CALR/MYO1C/PRKD2/MYADM/PYCARD/ROR2/ABL1/TNFRSF18/ICAM1/MAPK3/AKT2/FAM83H/BMP7/SMAD3/SERPINE1/STAT3/LGALS9/CORO1A/LRP1/DMTN/TMEM102/ILK/RHOC/AAMP/TRPV4/VEGFA/CCL21/SPHK1/NOS3/DIAPH1/MEGF8/CXCL14/RAC1/ZNF703/IL6R/PTK2B/NOTCH1…
GO:0007005	GO:0007005	mitochondrion organization	415	0.303949	1.35413	0.00521739	0.029065	0.0170772	3311	tags=26%, list=16%, signal=22%	YWHAE/TYMP/TP53/MYH14/EPAS1/BCL2L1/CEBPA/MARK2/TSPO/EIF4G1/LMNA/CHCHD10/MAP1LC3A/ATP13A2/IFI6/TP63/NECTIN2/BAP1/AKT1/TP73/CDC37/SCO2/TSC2/SREBF2/BAX/PPRC1/VAT1/USP36/PYCARD/BAK1/NDUFA13/SREBF1/CIDEB/TFDP1/GPX1/TOMM22/BOK/HCFC1/BAD/EYA2/ESRRA/FIS1/STAT3/MFN2/VDAC1/TMEM102/MAPT/ND2/OPA3/TOMM40/NOS3/POLDIP2/HIP1R/ARRB2/INF2/UBE2J2/PID1/RCC1L/ZNF205/SLC25A6/SMURF1/TIMM50/ECSIT/NDUFA11/PINK1/NDUFB7/YW…
GO:0031331	GO:0031331	positive regulation of cellular catabolic process	324	0.304082	1.3241	0.00888099	0.0382936	0.0224996	2513	tags=22%, list=12%, signal=19%	ZFP36L2/ZFP36L1/CEBPA/LARP1/LDLR/BAG6/MOV10/EZR/HSF1/RAD23A/APOE/CD81/AKT1/CCDC22/PRKCD/CDC37/CSNK1D/TSC2/BAX/SUPT5H/PACSIN3/LRSAM1/GTPBP1/KHSRP/TP53INP2/TMEM173/UPF1/ZFP36/MAPK3/HSPBP1/DNAJB2/AKT2/SGTA/BAD/KEAP1/FURIN/NUPR1/PLK3/KAT5/DVL1/MFN2/LRP1/STUB1/ULK1/USP5/FAF1/TRIB1/PTK2B/PLK1/ADRA2A/SMURF1/PLEKHN1/PINK1/HMOX1/OSBPL7/SMAD7/CLEC16A/SH3RF2/ENDOG/TPCN1/BCAP31/PNPLA2/TICAM1/STK11/TFEB/ABCD1…
GO:0009991	GO:0009991	response to extracellular stimulus	477	0.304309	1.37105	0.00175131	0.0150942	0.00886863	3209	tags=25%, list=15%, signal=21%	IGFBP2/COL1A1/FOSL1/TP53/AQP3/LARP1/TSPO/ALPL/EIF4G1/LDLR/GAS2L1/TGFB1/PKM/ALDH3A1/MAP1LC3A/GNAI2/BAIAP2/PPP1R9B/G6PD/HSF1/POR/TRPM4/CCND1/LCN2/GSTP1/APOE/AKT1/RELA/WDR24/SREBF2/P2RY2/SIPA1/ARHGAP35/UCP2/SFRP1/SREBF1/ZFP36/ICAM1/FOS/MAX/MAPK3/MBD3/TXN2/CDKN1A/BMP7/PEMT/FIS1/EIF4EBP1/RARA/TRPV4/ULK1/ASS1/FES/SORD/SLC39A4/DGKQ/CDKN2D/MYBBP1A/COMT/MTMR3/GLUL/SZT2/HSD11B2/NPRL3/PDK2/UPP1/HMOX1/EHMT2/…
GO:0048871	GO:0048871	multicellular organismal homeostasis	451	0.306831	1.37781	0.00348432	0.0224527	0.0131922	4065	tags=29%, list=19%, signal=24%	AQP3/KRT1/EPAS1/EIF4G1/KDM6B/KRT16/HSPB1/ALOX12B/ATP6AP1/STAT6/TNS2/HSF1/MFAP2/TP63/LCN2/METRNL/TMEM79/TFE3/NR1H2/RCN3/ZBTB7B/RAC3/BAX/FLT3LG/ACADVL/TCIRG1/UCP2/TP53INP2/SCNN1B/PPP1R13L/TMEM119/CNOT3/TPP1/ID1/SCD/CD34/IL4R/CDH3/GPX1/LDB1/TLE3/EHMT1/PEMT/LGR4/STAT3/MFN2/CORO1A/PRKACA/TRPV4/VEGFA/KDF1/NOS3/PRKAR1B/IRX3/RAC1/PTK2B/NOTCH1/ANKRD11/CSF1R/HYAL2/SMO/ADCY9/CDHR1/ADIPOR1/RAB3D/ACOT11/INPP5…
GO:0042119	GO:0042119	neutrophil activation	474	0.306842	1.38162	0.00175747	0.0150942	0.00886863	2298	tags=21%, list=11%, signal=19%	TRAPPC1/KRT1/CTSD/PKP1/ABR/CALML5/LAMP1/JUP/PKM/NBEAL2/GHDC/APRT/CYB5R3/ATP6V0C/ALDOA/PSMD3/RHOG/GAA/LCN2/GSTP1/GRN/BCR/CD177/S100A11/SLC44A2/PRKCD/TOM1/CDA/GPI/TSPAN14/AP1M1/DGAT1/VAT1/TUBB4B/TOLLIP/MVP/GM2A/B4GALT1/TCIRG1/RAB5B/TUBB/HGSNAT/PA2G4/STXBP2/PTGES2/AGPAT2/RAB24/PYCARD/CPNE1/DSC1/TMEM173/RAB5C/ACLY/LAMTOR1/PFKL/CFD/SIRPA/NAPRT/PTPN6/MIF/CTSA/AP2A2/CSNK2B/CD44/IGF2R/ACTR1B/MAN2B1/STK11…
GO:0051962	GO:0051962	positive regulation of nervous system development	484	0.307011	1.38815	0.00173913	0.0150942	0.00886863	4169	tags=30%, list=20%, signal=24%	ARHGDIA/FLNA/SF3A2/HMG20B/MARK2/TSPO/EIF4G1/SRRT/TGFB1/NBL1/NDRG4/ANAPC2/RGS14/KATNB1/BAIAP2/SPINT1/FZD1/MDK/DUOXA1/APOE/PLXNB3/GRN/RELA/TP73/CRABP2/AP2A1/CSNK1D/EPHB3/ITGA3/AGRN/KCTD11/ARHGAP35/TNFRSF12A/CX3CL1/NGFR/CPNE1/C1QA/DVL3/STK25/RAPGEF1/BMP7/DVL1/LRP1/MAPT/RARA/ILK/STMN2/SERPINF1/VEGFA/CUX1/FES/MEGF8/IRX3/MOB2/PTK2B/NOTCH1/SPEN/SMO/CDC20/AGER/GDI1/SMARCD3/PTK7/SMURF1/LRTM2/DPYSL3/METRN/…
GO:0036230	GO:0036230	granulocyte activation	480	0.307246	1.38575	0.00176367	0.0150942	0.00886863	2298	tags=21%, list=11%, signal=19%	TRAPPC1/KRT1/CTSD/PKP1/VAMP2/ABR/CALML5/LAMP1/JUP/PKM/NBEAL2/GHDC/APRT/CYB5R3/ATP6V0C/ALDOA/PSMD3/RHOG/GAA/LCN2/GSTP1/GRN/BCR/CD177/S100A11/SLC44A2/PRKCD/TOM1/CDA/GPI/TSPAN14/AP1M1/DGAT1/VAT1/TUBB4B/TOLLIP/MVP/GM2A/B4GALT1/TCIRG1/RAB5B/TUBB/HGSNAT/PA2G4/STXBP2/PTGES2/AGPAT2/RAB24/PYCARD/CPNE1/DSC1/TMEM173/RAB5C/ACLY/LAMTOR1/PFKL/CFD/SIRPA/NAPRT/PTPN6/MIF/CTSA/AP2A2/CSNK2B/CD44/IGF2R/ACTR1B/MAN2B1…
GO:0003012	GO:0003012	muscle system process	403	0.309288	1.37552	0.0034904	0.0224527	0.0131922	3433	tags=22%, list=16%, signal=19%	COMP/VEGFB/FLNA/SORBS3/SMTN/MYH14/JUP/SLC6A8/PXN/LMNA/IGFBP5/TPM4/RYR1/DMPK/G6PD/TRPM4/ALDOA/LTB4R/GAA/FXYD1/CRYAB/MYL9/ARHGEF11/TNNT1/PPP1R13L/TNFRSF1A/GAMT/KLF4/NMUR1/SMAD3/PRKACA/SPHK1/SULF2/NOS3/MYL5/PIN1/TPM2/NOTCH1/ADRA2A/TNNI2/HMOX1/SMAD7/HAMP/CAMTA2/TNNC1/CTDP1/OXT/PABPN1/RHOA/PGAM2/CNN1/BIN1/MYL6B/GRK2/CCDC78/TNFRSF1B/SGCA/C12orf57/TPM1/GTF2IRD1/SCN4B/HAND2/EEF2/MYH13/JSRP1/CDK9/BDKRB2/N…
GO:0044089	GO:0044089	positive regulation of cellular component biogenesis	475	0.309724	1.39598	0.00175439	0.0150942	0.00886863	3848	tags=28%, list=18%, signal=24%	EPS8L2/HRAS/CDC42EP1/FLNA/PFN1/EMILIN1/FOSL1/NUP62/SORBS3/TP53/FSCN1/EIF4G1/TGFB1/CDC42EP5/PXN/VASP/GTF2H4/ATP13A2/EPS8L1/HSF1/CSF3/ARPC4/EPHB3/THY1/BAX/AGRN/EPHA2/LRSAM1/ARHGAP35/CDC42EP4/MYO1C/CX3CL1/NUMA1/WASF2/EVL/SFRP1/PYCARD/CORO1B/HGS/ABL1/ICAM1/ID1/FLOT1/MARK4/BMP7/SMAD3/CORO1A/SDC4/MAPT/DCTN1/STUB1/FCHSD1/RHOC/VEGFA/CCL21/ULK1/SNF8/FES/HIP1R/FAF1/FHOD1/CDC34/RAC1/PTK2B/PALM/BCAS3/LRTM2/P…
GO:1902532	GO:1902532	negative regulation of intracellular signal transduction	459	0.309747	1.39117	0.00175439	0.0150942	0.00886863	3641	tags=29%, list=17%, signal=24%	CD74/GRINA/EMILIN1/NUP62/ZNF385A/AKT1S1/BCL2L1/HSPB1/PPP2R1A/RGS14/GNAI2/NDRG2/FBLN1/EZR/GSTP1/APOE/AKT1/RELA/CCDC22/PRKCD/PIK3R2/TSC2/GPS1/ITGA3/EPHA2/SOCS3/ARHGAP35/DUSP1/SFRP1/MYADM/PYCARD/CBLC/CPNE1/HGS/MEN1/DUSP7/NONO/ABL1/NDUFA13/GPS2/LEMD2/KCTD13/KLF4/GPX1/SIRPA/RAPGEF1/PTPN6/NLRX1/MIF/MUC1/PHLDA3/SPRED2/TIMP3/BMP7/MFN2/CD44/PSCA/SH3BP1/ARRB2/PIN1/CDC34/CREB3L1/CDKN2D/MAPK7/CHP1/SOCS1/HYAL…
GO:0051098	GO:0051098	regulation of binding	351	0.310683	1.36841	0.00690846	0.0337918	0.0198545	3234	tags=26%, list=16%, signal=23%	CARM1/TRIM28/PTPRF/MARK2/EIF4G1/ADAM15/TGFB1/ZBTB7C/MDFI/HSF1/RFNG/CSF3/APOE/LDOC1/AKT1/SYMPK/PRKCD/ZBTB7A/DOT1L/BAX/H1F0/PPP1CA/CPNE1/MEN1/TMEM173/BAK1/ABL1/ID1/MAPK3/KLF4/GTF2F1/ACE/NFATC4/DNAJB2/FLOT1/PRMT7/SMAD3/CSNK2B/DVL1/AMFR/LRP1/PRKACA/MEPCE/RARA/BAMBI/STUB1/DDX11/GOLGA2/HIP1R/ARRB2/PIN1/TRAF4/PLXND1/PLK1/CTNNBIP1/SMO/HDAC5/AGER/PYGO2/SMARCD3/TRAF2/HMOX1/ZNF593/HSP90AB1/ACD/MAPRE3/PLAUR/…
GO:0051346	GO:0051346	negative regulation of hydrolase activity	375	0.314923	1.39391	0.00346021	0.0224527	0.0131922	3696	tags=27%, list=18%, signal=23%	YWHAE/HRAS/TP53/CAMSAP3/LMTK3/PPP1R14B/ECM1/PPP1R15A/GNAI2/RTKN/CABIN1/SPINT1/PPP1R9B/POR/IFI6/PTPA/PLXNB3/AKT1/GPS1/CRYAB/UBE2Z/RPS6KA1/NGFR/ABL1/GPS2/PEBP1/KLF4/GPX1/PRDX5/PPP1R10/MICAL1/FURIN/SIAH2/TIMP3/MYO1D/SERPINE1/CD44/DHCR24/LMTK2/VEGFA/ANGPTL4/COL7A1/NOS3/PAPLN/ARRB2/CDKN2D/MAPK7/CHP1/TNK2/UBXN1/ELL/PPP1R37/TIMP1/APLP2/BCAS3/PPIF/TIMP2/SH3RF2/SFI1/AQP1/PRKCZ/BST2/PLAUR/PPME1/PAK2/SFRP2/…
GO:1903827	GO:1903827	regulation of cellular protein localization	482	0.315225	1.4223	0.00176367	0.0150942	0.00886863	3433	tags=26%, list=16%, signal=23%	YWHAE/ERBB2/HRAS/FLNA/NUCB1/NUP62/TRIM28/TP53/APOD/VAMP2/BCL2L1/ABHD17A/TRIM29/JUP/RAB11B/TGFB1/LMNA/RANGAP1/ATP13A2/EZR/TP63/MMP14/BAP1/RHOG/GBF1/CD81/AKT1/TP73/PRKCD/PIK3R2/SREBF2/ITGA3/EPHA2/SUPT6H/USP36/MYO1C/NUMA1/ABCA7/VPS28/TP53INP2/B3GAT3/NGFR/SREBF1/TM9SF4/DVL3/TFDP1/AKT2/AP2M1/MARK4/BAD/PLK3/MCRS1/SMAD3/DVL1/FIS1/LRP1/PRKACA/DMTN/MAPT/CDH1/ARHGEF16/PIN1/GRIPAP1/CHP1/UBE2J2/PID1/PTPN14/P…
GO:0006979	GO:0006979	response to oxidative stress	402	0.316318	1.40803	0.00173611	0.0150942	0.00886863	3300	tags=27%, list=16%, signal=23%	COL1A1/FOSL1/TP53/APOD/KRT1/EPAS1/KDM6B/PXN/P4HB/GPX3/HSPB1/MAP1LC3A/RGS14/ZNF580/DUOX1/ATP13A2/STAT6/G6PD/HSF1/FZD1/MMP14/PNKP/LCN2/GSTP1/APOE/AKT1/RELA/PRKCD/PML/CRYAB/DUSP1/UCP2/SIGMAR1/NONO/BAK1/ABL1/SOD3/FOS/MAPK3/KLF4/GPX1/STK25/SIRPA/NAPRT/PRDX5/BAD/TXN2/PLK3/BMP7/CCS/DHCR24/GPX4/MAPT/SCARA3/SPHK1/NOS3/MAPK13/MAPK7/FBLN5/PTK2B/HYAL2/SZT2/PDK2/TRAF2/SP1/FGF8/PINK1/HMOX1/PPIF/MPV17/CYGB/AQP1…
GO:0002446	GO:0002446	neutrophil mediated immunity	475	0.318655	1.43623	0.00175439	0.0150942	0.00886863	2298	tags=21%, list=11%, signal=20%	TRAPPC1/KRT1/CTSD/PKP1/WDR1/ABR/CALML5/LAMP1/JUP/PKM/NBEAL2/GHDC/APRT/CYB5R3/ATP6V0C/ALDOA/PSMD3/RHOG/GAA/LCN2/GSTP1/GRN/BCR/CD177/S100A11/SLC44A2/PRKCD/TOM1/CDA/GPI/TSPAN14/AP1M1/DGAT1/VAT1/TUBB4B/TOLLIP/MVP/GM2A/B4GALT1/TCIRG1/RAB5B/TUBB/HGSNAT/PA2G4/STXBP2/PTGES2/AGPAT2/RAB24/PYCARD/CPNE1/DSC1/TMEM173/RAB5C/ACLY/LAMTOR1/PFKL/ACE/CFD/SIRPA/NAPRT/PTPN6/MIF/CTSA/AP2A2/CSNK2B/CD44/IGF2R/ACTR1B/MAN…
GO:0070482	GO:0070482	response to oxygen levels	363	0.319957	1.41246	0.00344828	0.0224527	0.0131922	3209	tags=26%, list=15%, signal=22%	COL1A1/TP53/AQP3/EPAS1/ACTN4/ZFP36L1/ADAM15/TGFB1/P4HB/PKM/LMNA/ALDH3A1/RYR1/ATP6AP1/HSF1/RAMP2/MMP14/PSMD3/AKT1/SCAP/PML/CRYAB/ATP6V0D1/ALKBH5/UCP2/SFRP1/CITED2/AGTRAP/PSME3/SOD3/ICAM1/TM9SF4/CD34/BAD/TXN2/CDKN1A/PLK3/BMP7/SMAD3/FIS1/EIF4EBP1/PLOD1/STUB1/VEGFA/ANGPTL4/NDRG1/VASN/NPPC/PSMB6/PTK2B/NOTCH1/AGER/HSD11B2/POLG/PLAU/PLEKHN1/PINK1/HMOX1/PSMB10/ACVRL1/CYGB/AQP1/ENDOG/MECP2/ASCL2/AHCY/XRCC…
GO:0010721	GO:0010721	negative regulation of cell development	291	0.320231	1.38655	0.00355872	0.0224527	0.0131922	2352	tags=18%, list=11%, signal=16%	ARHGDIA/CARM1/TP53/KREMEN1/ACTN4/TSPO/LDLR/ADGRG1/TGFB1/NOTCH3/FBLN1/G6PD/APOE/TP73/THY1/KCTD11/CALR/PLXNA3/CX3CL1/NGFR/ID1/CTDSP1/NFATC4/TRIM11/BMP7/STAT3/LRP1/HES5/ARHGAP4/DMTN/GAK/STMN2/TRPV4/NPPC/IRX3/RTN4RL1/NOTCH1/RTN4R/GDI1/DPYSL3/PTPRS/GORASP1/ADCY6/SOX2/CTDP1/FKBP4/ASCL2/RHOA/NGEF/TMEM98/IDH2
GO:0045666	GO:0045666	positive regulation of neuron differentiation	329	0.320397	1.40093	0.0017452	0.0150942	0.00886863	4205	tags=31%, list=20%, signal=25%	ARHGDIA/SF3A2/HMG20B/MARK2/EIF4G1/NBL1/NDRG4/ANAPC2/KATNB1/BAIAP2/FZD1/MDK/DUOXA1/APOE/PLXNB3/GRN/CRABP2/AP2A1/CSNK1D/ITGA3/KCTD11/ARHGAP35/TNFRSF12A/CX3CL1/NGFR/CPNE1/DVL3/STK25/RAPGEF1/BMP7/DVL1/LRP1/MAPT/RARA/ILK/STMN2/SERPINF1/VEGFA/CUX1/FES/MEGF8/IRX3/MOB2/PTK2B/GDI1/PTK7/SMURF1/DPYSL3/METRN/TIMP2/FOXO6/TRAK1/PLXNB2/RASAL1/COBL/OBSL1/RHOA/CAMK1/STK11/NTRK1/CBFA2T2/PRPF19/TWF2/ARHGEF2/SHANK3/…
GO:0009636	GO:0009636	response to toxic substance	462	0.320466	1.44117	0.00174216	0.0150942	0.00886863	3883	tags=29%, list=19%, signal=24%	COL1A1/EPHX1/FOSL1/NUCB1/BCL2L1/SPI1/EIF4G1/KDM6B/GPX3/MAP1LC3A/ZNF580/DUOX1/STAT6/G6PD/HSF1/CSF3/MPST/CCND1/LCN2/GSTP1/APOE/RELA/PRKCD/CLDN7/BAX/CRYAB/DUSP1/SIGMAR1/BAK1/LTC4S/ABL1/ICAM1/FOS/EPHX2/MAPK3/KLF4/GPX1/STK25/SIRPA/PRDX5/BAD/NUPR1/CDKN1A/BMP7/EHMT1/PEMT/FIS1/STAT3/EIF4EBP1/GPX4/RARA/SPHK1/CDH1/ASS1/DDX11/NOS3/MAPK13/NPPC/MAPK7/FBLN5/PTK2B/SZT2/PINK1/HMOX1/PPIF/HAMP/CYGB/DMAP1/AQP1/ENDO…
GO:0002283	GO:0002283	neutrophil activation involved in immune response	464	0.320523	1.44142	0.00175131	0.0150942	0.00886863	2298	tags=22%, list=11%, signal=20%	TRAPPC1/KRT1/CTSD/PKP1/ABR/CALML5/LAMP1/JUP/PKM/NBEAL2/GHDC/APRT/CYB5R3/ATP6V0C/ALDOA/PSMD3/RHOG/GAA/LCN2/GSTP1/GRN/BCR/CD177/S100A11/SLC44A2/PRKCD/TOM1/CDA/GPI/TSPAN14/AP1M1/DGAT1/VAT1/TUBB4B/TOLLIP/MVP/GM2A/B4GALT1/TCIRG1/RAB5B/TUBB/HGSNAT/PA2G4/STXBP2/PTGES2/AGPAT2/RAB24/PYCARD/CPNE1/DSC1/TMEM173/RAB5C/ACLY/LAMTOR1/PFKL/CFD/SIRPA/NAPRT/PTPN6/MIF/CTSA/AP2A2/CSNK2B/CD44/IGF2R/ACTR1B/MAN2B1/STK11…
GO:0090066	GO:0090066	regulation of anatomical structure size	418	0.321166	1.43325	0.0017452	0.0150942	0.00886863	3482	tags=26%, list=17%, signal=22%	COMP/SPTBN2/PFN1/AKT1S1/WDR1/CDC42EP5/RARG/PPP1R15A/VASP/CAPG/ANAPC2/ATP13A2/EZR/TRPM4/CSF3/APOE/AKT1/PRKCD/ARPC4/CRABP2/P2RY2/LRRC8E/ARHGAP35/TNFRSF12A/PLXNA3/MYO1C/EVL/PPP1CA/MYADM/PYCARD/CORO1B/ABL1/ELN/ICAM1/EPHX2/ACE/GPX1/WDTC1/AP2M1/CFL1/LAMTOR4/CORO1A/LRP1/ARHGAP4/DMTN/MAPT/ILK/FCHSD1/TRPV4/VEGFA/CCL21/SNF8/SH3BP1/NOS3/HIP1R/MEGF8/NPPC/PLEKHG2/RAC1/WNT7B/PTK2B/RTN4R/GDI1/ADRA2A/HMOX1/LRRC8…
GO:0010720	GO:0010720	positive regulation of cell development	489	0.321479	1.45311	0.0017452	0.0150942	0.00886863	4169	tags=30%, list=20%, signal=25%	ARHGDIA/FLNA/SF3A2/HMG20B/MARK2/TSPO/EIF4G1/SRRT/TGFB1/NBL1/NDRG4/ANAPC2/RGS14/KATNB1/BAIAP2/ATP6AP1/SPINT1/FZD1/MDK/DUOXA1/APOE/PLXNB3/GRN/RELA/TP73/CRABP2/AP2A1/CSNK1D/RAC3/ITGA3/KCTD11/ARHGAP35/CALR/TNFRSF12A/CX3CL1/MYADM/NGFR/CPNE1/C1QA/ABL1/DVL3/STK25/RAPGEF1/BAD/BMP7/DVL1/LRP1/DMTN/CLDN5/MAPT/RARA/ILK/STMN2/SERPINF1/VEGFA/CUX1/FES/PIN1/TRIB1/MEGF8/IRX3/MOB2/RAC1/PTK2B/NOTCH1/SPEN/SMO/AGER/G…
GO:0052548	GO:0052548	regulation of endopeptidase activity	331	0.322152	1.41002	0.00173611	0.0150942	0.00886863	3204	tags=27%, list=15%, signal=23%	YWHAE/CTSD/EFNA3/ATP13A2/SPINT1/HSF1/POR/IFI6/TP63/ADRM1/AKT1/PML/BAX/CRYAB/UBE2Z/RPS6KA1/PYCARD/NGFR/BAK1/NDUFA13/PEBP1/CIDEB/KLF4/GPX1/TBC1D10A/BOK/PRDX5/BAD/MICAL1/AKIRIN2/FURIN/SIAH2/TIMP3/SMAD3/SERPINE1/FIS1/STAT3/LGALS9/CD44/DHCR24/MAPT/VEGFA/COL7A1/SOX7/PAPLN/HIP1R/ARRB2/CDKN2D/PRR7/AGER/TIMP1/MIR205/TRAF2/APLP2/AQP1/NLRP1/SOX2/HIP1/RHOA/BST2/PLAUR/BCAP31/PAK2/PIDD1/SFRP2/ALOX12/BIN1/PPARG…
GO:0043312	GO:0043312	neutrophil degranulation	461	0.322285	1.44826	0.00175131	0.0150942	0.00886863	2298	tags=22%, list=11%, signal=20%	TRAPPC1/KRT1/CTSD/PKP1/ABR/CALML5/LAMP1/JUP/PKM/NBEAL2/GHDC/APRT/CYB5R3/ATP6V0C/ALDOA/PSMD3/RHOG/GAA/LCN2/GSTP1/GRN/BCR/CD177/S100A11/SLC44A2/PRKCD/TOM1/CDA/GPI/TSPAN14/AP1M1/DGAT1/VAT1/TUBB4B/TOLLIP/MVP/GM2A/B4GALT1/TCIRG1/RAB5B/TUBB/HGSNAT/PA2G4/STXBP2/PTGES2/AGPAT2/RAB24/PYCARD/CPNE1/DSC1/TMEM173/RAB5C/ACLY/LAMTOR1/PFKL/CFD/SIRPA/NAPRT/PTPN6/MIF/CTSA/AP2A2/CSNK2B/CD44/IGF2R/ACTR1B/MAN2B1/STK11…
GO:0010038	GO:0010038	response to metal ion	319	0.322433	1.40688	0.00177305	0.0150942	0.00886863	2371	tags=19%, list=11%, signal=17%	JUND/TFAP2A/IGFBP2/AQP3/BSG/FOSB/CEBPA/TSPO/CRIP1/JUNB/MAP1LC3A/RYR1/ATP13A2/G6PD/HSF1/CCND1/PEF1/AKT1/MT1X/CALR/DUSP1/TCIRG1/PPP1CA/CPNE1/C1QA/SOD3/ICAM1/FOS/CAPN3/MAPK3/D2HGDH/NFATC4/SLC39A13/BAD/DMTN/SLC25A23/MAPT/SERPINF1/CDH1/ASS1/NDRG1/SORD/STIM1/FSTL3/PTK2B/MT2A/GDI1/ITPR3/HMOX1/PPIF/HAMP/RASAL1/AQP1/NUDT1/ENDOG/TNNC1/S100A16/FUS/PGAM2/LOXL2/ADD1/GSS
GO:0045862	GO:0045862	positive regulation of proteolysis	307	0.322604	1.40297	0.00357782	0.0224527	0.0131922	3205	tags=27%, list=15%, signal=24%	CTSD/CEBPA/EFNA3/BAG6/FBLN1/HSF1/MMP14/RAD23A/ADRM1/APOE/GRN/AKT1/CCDC22/PCOLCE/RCN3/PML/CSNK1D/BAX/PACSIN3/PYCARD/NGFR/BAK1/NDUFA13/CAPN3/MAPK3/HSPBP1/CIDEB/DNAJB2/TBC1D10A/MYH9/BOK/SGTA/BAD/KEAP1/AKIRIN2/FURIN/NUPR1/PLK3/SMAD3/DVL1/FIS1/STAT3/LGALS9/MAPT/STUB1/SOX7/HIP1R/USP5/TRIB1/PTK2B/PRR7/PLK1/AGER/ADRA2A/MIR205/SMURF1/TRAF2/PINK1/OSBPL7/SMAD7/SH3RF2/NLRP1/HIP1/RHOA/BCAP31/PIDD1/SFRP2/ALOX1…
GO:0010035	GO:0010035	response to inorganic substance	490	0.324402	1.46567	0.00174825	0.0150942	0.00886863	3507	tags=27%, list=17%, signal=23%	JUND/TFAP2A/IGFBP2/COL1A1/FOSL1/AQP3/BSG/FOSB/CEBPA/TSPO/KDM6B/COL18A1/CRIP1/JUNB/MAP1LC3A/ZNF580/RYR1/ATP13A2/STAT6/G6PD/HSF1/CCND1/PEF1/BAP1/LCN2/AKT1/RELA/PRKCD/KRT8/CRYAB/SIPA1/MT1X/CALR/DUSP1/TCIRG1/CD9/UCP2/SIGMAR1/PPP1CA/CPNE1/BAK1/C1QA/ABL1/SOD3/ICAM1/FOS/CAPN3/MAPK3/KLF4/GPX1/D2HGDH/NFATC4/STK25/SIRPA/SLC39A13/BAD/BMP7/FIS1/DMTN/SLC25A23/MAPT/SERPINF1/SPHK1/CDH1/ASS1/DDX11/NDRG1/NOS3/SOR…
GO:0009895	GO:0009895	negative regulation of catabolic process	266	0.325421	1.38959	0.00187266	0.0150942	0.00886863	3268	tags=24%, list=16%, signal=21%	PKP3/FLNA/TP53/PKP1/LARP1/TSPO/EIF4G1/BAG6/ATP13A2/AKT1/RELA/GIPC1/RBM10/SNRNP70/PML/TSC2/KLHL22/CIRBP/USP36/WDR6/SMARCC1/ZFP36/MAPKAPK2/YBX1/SGTA/FURIN/NUPR1/CTSA/TIMP3/SMAD3/STAT3/PHF23/GOLGA2/POLDIP2/PIN1/DHX34/UBXN1/ADRA2A/TIMP1/PINK1/HMOX1/CLEC16A/RASIP1/THRAP3/HSP90AB1/CHMP4B/TBC1D14/RRAGA/ADGRB1/TAB3/ELAVL1/PAM16/YBX3/HTRA2/CPTP/NOS2/CST3/OS9/MAPK14/UBAC2/DDRGK1/SIRT6/ALAD/KIF25/GSK3A
GO:0048545	GO:0048545	response to steroid hormone	358	0.326646	1.44164	0.0017301	0.0150942	0.00886863	3269	tags=23%, list=16%, signal=20%	ZFP36L2/IGFBP2/COL1A1/IL1RN/FOSL1/CARM1/WBP2/FOSB/RXRB/ZFP36L1/TSPO/NR2F6/ALPL/TGFB1I1/TGFB1/RARG/ALDH3A1/ENG/RAMP2/TP63/CCND1/GSTP1/MDK/NR1H2/RELA/ZBTB7A/CALR/DUSP1/ABCA2/SFRP1/SREBF1/ZFP36/ICAM1/FOS/SMARCA4/BAD/ESRRA/CDKN1A/KAT5/BMP7/KMT2D/EIF4EBP1/CALCOCO1/RARA/RXRA/SERPINF1/PTPRU/ASS1/ARID1A/PAQR7/ARRB2/WNT7B/NR2F2/HSD11B2/TADA3/NCOR2/VDR/AQP1/IGFBP7/FKBP4/OXT/RHOA/SLIT3/PPARG/DDX54/TYMS/SKP2…
GO:0007423	GO:0007423	sensory organ development	499	0.327334	1.48013	0.0017452	0.0150942	0.00886863	4346	tags=29%, list=21%, signal=24%	TFAP2A/FKBP8/VANGL2/CEBPA/ABR/LAMB2/TGFB1/RARG/MFAP2/FZR1/BCR/SIX2/ZNF513/SCO2/WNT5B/THY1/COL5A1/BAX/CRYAB/IRX5/EPHA2/ARHGAP35/TCIRG1/NECTIN1/TBX1/NINJ1/PPP1R13L/TSKU/BAK1/ROR2/TBX2/MAX/MAPK3/MAPKAPK2/SMARCA4/CDKN1C/JAG2/KLF4/LRP5/C1QB/BMP7/SMAD3/DVL1/STAT3/MFN2/HES5/SDC4/RARA/RXRA/SERPINF1/VEGFA/ARID1A/WNT10A/DCHS1/COL8A2/CXCL14/WNT7B/NAGLU/IMPDH2/PYGO2/RAB11FIP4/SMARCD3/PTK7/FGF8/NF2/OSR1/CEBPD…
GO:0030099	GO:0030099	myeloid cell differentiation	377	0.32749	1.45009	0.0017301	0.0150942	0.00886863	3927	tags=27%, list=19%, signal=23%	CD74/SBNO2/ZNF385A/EPAS1/ZFP36L1/CEBPA/WDR1/SPI1/TGFB1/RARG/JUNB/SH3PXD2A/ATP6AP1/NBEAL2/MOV10/G6PD/CSF3/C1QC/ACTN1/TFE3/CD81/KLF13/FASN/ZBTB7A/PML/RELB/EPHA2/ACIN1/MYL9/TCIRG1/WASF2/SFRP1/ROR2/ZFP36/FOS/CDKN1C/LDB1/MYH9/EIF6/PTPN6/ESRRA/WDR5/KMT2D/STAT3/ZBTB16/IRF7/DMTN/RARA/VEGFA/FES/TRIB1/TOB2/FSTL3/PTK2B/CSF1R/CTNNBIP1/FAM210B/NFE2/INPP5D/ETV2/CEBPE/FAM20C/RAB7B/PAF1/PRMT1/PIAS3/ADD1/PPARG/LT…
GO:0042326	GO:0042326	negative regulation of phosphorylation	400	0.327582	1.45804	0.00173913	0.0150942	0.00886863	3261	tags=28%, list=16%, signal=24%	EMILIN1/NUP62/FKBP8/AKT1S1/CEBPA/EIF4G1/TGFB1/HSPB1/PPP2R1A/RGS14/NDRG2/FBLN1/ENG/EZR/PKN1/ZGPAT/GSTP1/APOE/AKT1/PRKCD/PIK3R2/PPP2R5D/TSC2/THY1/GPS1/BAX/MVP/SOCS3/DUSP1/SFRP1/MYADM/PYCARD/CBLC/MEN1/DUSP7/BAK1/ABL1/GPS2/CTDSP1/LEMD2/CDKN1C/KLF4/SIRPA/RAPGEF1/LRP5/PTPN6/MIDN/MICAL1/NUPR1/SPRED2/CDKN1A/TIMP3/BMP7/DVL1/STAT3/DMTN/MAPT/PSCA/CHMP6/ILK/ARRB2/PIN1/PRKAR1B/TRIB1/CACTIN/DGKQ/CDKN2D/CHP1/PI…
GO:0003002	GO:0003002	regionalization	302	0.327661	1.42607	0.00177305	0.0150942	0.00886863	4714	tags=34%, list=23%, signal=27%	SEMA3F/TP53/FKBP8/VANGL2/SSBP3/ADGRG1/RARG/NBL1/MDFI/TP63/SIX2/FBXL15/MED12/TBX1/SFRP1/CITED2/ROR2/C1QA/LDB1/CELSR2/BARX1/SMAD3/ZBTB16/PRKACA/HES5/MEGF8/IRX3/WNT7B/PBX2/CTNNBIP1/SMO/NR2F2/SMARCD3/FGF8/ETS2/OSR1/COBL/ARC/SFRP2/HES7/MSX2/PCGF2/TBX3/FOXC1/LHX1/FUZ/SKI/KAT2A/EVX1/SRF/GPR161/SIX1/GLI2/GBX2/HOXD9/RING1/EP300/FOXB1/FOXC2/BMP2/GSX2/NEUROG1/NKX2-1/DVL2/BTG2/OTX1/CYP26B1/LFNG/DMRTA2/VAX2/S…
GO:0022407	GO:0022407	regulation of cell-cell adhesion	364	0.327727	1.44366	0.00174825	0.0150942	0.00886863	3203	tags=25%, list=15%, signal=21%	ERBB2/IGFBP2/CD74/IL1RN/MAD1L1/CDSN/MINK1/TGFB1/FLOT2/PTPN23/FXYD5/MDK/CD81/AKT1/RELA/PRKCD/EFNB1/ZBTB7B/EPHB3/THY1/AP3D1/CX3CL1/CD276/CD9/MYADM/PYCARD/CITED2/C1QTNF1/ABL1/ICAM1/IL4R/KLF4/FLOT1/PTPN6/BAD/CELSR2/BMP7/LGALS9/ZBTB16/LRFN3/CORO1A/CD44/DMTN/IL1RL2/SDC4/RARA/TRPV4/CCL21/PTPRU/CDH1/ASS1/ZMIZ1/MAPK7/RAC1/ZNF703/FSTL3/SOCS1/AGER/LRRC32/ZAP70/NF2/SMAD7/AFDN/FOXP3/SOX2/ITGB2/PDCD1/WNT4/PRKC…
GO:0060070	GO:0060070	canonical Wnt signaling pathway	291	0.328181	1.42097	0.00177936	0.0150942	0.00886863	3722	tags=30%, list=18%, signal=25%	IGFBP4/IGFBP2/COL1A1/KREMEN1/JUP/RARG/FZD1/TRPM4/PSMD3/MDK/IGFBP6/APOE/CTDNEP1/WNT5B/CSNK1D/MED12/BCL9L/SOX4/SFRP1/PPP1CA/ROR2/PSME3/DVL3/CDH3/KLF4/RAPGEF1/LRP5/TLE2/SIAH2/SMAD3/DVL1/LGR4/PORCN/BAMBI/ILK/PTPRU/SULF2/SOX7/WNT10A/PIN1/PSMB6/ZNF703/CHD8/WNT7B/PYGO2/PTK7/FGF8/ADGRA2/RNF220/PSMB10/SOX2/TBL1X/WNT4/DLX5/SFRP2/STK11/PSMD8/RSPO1/CCNY/PSMC3/SLC9A3R1/EGR1/PRDM15/APC2/FUZ/FZD2/EMD/MAPK14/PSM…
GO:0018212	GO:0018212	peptidyl-tyrosine modification	330	0.329459	1.44053	0.0017452	0.0150942	0.00886863	3546	tags=28%, list=17%, signal=24%	ERBB2/CD74/FGFR3/MAP2K2/TP53/TGFB1/PPP2R1A/HSF1/CSF3/ZGPAT/CD81/PRKCD/SHC1/EPHB3/THY1/EPHB6/EPHA2/DYRK1B/MVP/SOCS3/SFRP1/CBLC/TIE1/TNFRSF1A/ROR2/ABL1/TYK2/TNFRSF18/ICAM1/MAPK3/ACE/STAP2/PTPN6/MST1R/MIF/STAT3/CD44/HES5/DMTN/TMEM102/CHMP6/LMTK2/VEGFA/FES/TYRO3/ARRB2/DGKQ/IL6R/PTK2B/TNK2/SOCS1/CSF1R/EHD4/CRLF1/HYAL2/ZAP70/ADRA2A/FGF8/NF2/FLT4/ITGB2/TGFA/CSPG4/PRKCZ/PAK2/SFRP2/VPS25/NTRK1/ITGA5/GAS6/…
GO:0030111	GO:0030111	regulation of Wnt signaling pathway	319	0.330389	1.4416	0.00177305	0.0150942	0.00886863	3386	tags=27%, list=16%, signal=23%	IGFBP4/IGFBP2/COL1A1/KREMEN1/VANGL2/JUP/PPP2R1A/MDFI/FZD1/ATP6V0C/TRPM4/PSMD3/MDK/IGFBP6/APOE/CTDNEP1/WNT5B/CSNK1D/ITGA3/TCF7L1/APCDD1/SOX4/SFRP1/PPP1CA/TSKU/ROR2/ABL1/PSME3/DVL3/SMARCA4/CDH3/NFATC4/RAPGEF1/TLE2/BARX1/SIAH2/SMAD3/DVL1/LGR4/LRP1/BAMBI/ILK/PTPRU/SULF2/SOX7/PIN1/PSMB6/ZNF703/CHD8/PTK7/ADGRA2/RNF220/PSMB10/FOXP3/SOX2/TBL1X/DLX5/HIC1/SFRP2/STK11/PSMD8/RSPO1/CCNY/PSMC3/TLE1/SLC9A3R1/EG…
GO:0010632	GO:0010632	regulation of epithelial cell migration	211	0.331111	1.37888	0.0131086	0.0466207	0.0273922	3188	tags=25%, list=15%, signal=21%	PFN1/JUP/TGFB1/RAB25/HSPB1/ZNF580/PTPN23/APOE/GRN/AKT1/GPI/ITGA3/EPHA2/CALR/PRKD2/EVL/ABL1/KLF4/CSNK2B/AAMP/SERPINF1/VEGFA/SH3BP1/NOS3/EPPK1/PTK2B/NOTCH1/GLUL/BCAR1/HDAC5/NR2F2/ADIPOR1/BCAS3/SP1/ADGRA2/HMOX1/ACVRL1/FLT4/MECP2/RHOA/ALOX12/PPARG/ADGRB1/ATOH8/FGFBP1/EMC10/HDAC6/HYAL1/MAP3K3/JUN/RHOB/SRC/FOXC2
GO:0050679	GO:0050679	positive regulation of epithelial cell proliferation	174	0.331767	1.35456	0.0150659	0.0497762	0.0292462	4328	tags=32%, list=21%, signal=25%	ERBB2/HRAS/ECM1/TGFB1/ZNF580/TP63/CCND1/MDK/PLXNB3/GRN/AKT1/EGFL7/B4GALT1/TBX1/PRKD2/SFRP1/HTRA1/ID1/CDH3/BAD/STAT3/VEGFA/TGM1/ZNF703/GLUL/SMO/SP1/HMOX1/OSR1/ACVRL1/FLT4/TGFA/DLX5/NR4A1/FGFBP1/EMC10/SIRT6/HYAL1/JUN/RPTOR/MYC/BMP2/CCL24/MIR10A/CCL5/BMP4/LACRT/GHSR/THBS4/HPN/PDGFB/BMPR2/PLCG1/C5AR2/REG3G
GO:0051260	GO:0051260	protein homooligomerization	326	0.331872	1.44838	0.00176056	0.0150942	0.00886863	3402	tags=26%, list=16%, signal=22%	EMILIN1/TP53/PKM/LY6G6C/GPX3/VASP/RYR1/HSF1/TRPM4/TP63/ALDOA/LCN2/APOE/KCTD5/CDA/CLDN7/BAX/CRYAB/MUC20/KCTD11/SHKBP1/C1QTNF2/B4GALT1/TMEM120A/EVL/SIGMAR1/PYCARD/DCXR/C1QTNF1/CRTC2/EHD1/KCTD13/FLOT1/SHMT2/MIF/SLC1A5/FIS1/CLPP/RXRA/RHOC/ANGPTL4/KCTD1/GOLGA2/PEX5/KCTD15/EHD4/GLUL/IMPDH2/NACC1/TRAF2/ITPR3/HMOX1/DPYSL3/FGFRL1/KCNF1/ARC/FUS/CHMP4B/KCNG2/PRMT1/MCOLN1/ELAVL1/PEX14/TNFAIP1/SHARPIN/SKI/KCT…
GO:0019216	GO:0019216	regulation of lipid metabolic process	369	0.332487	1.46642	0.00175131	0.0150942	0.00886863	3236	tags=26%, list=16%, signal=22%	FGFR3/CARM1/LSR/APOD/LSS/TSPO/LDLR/TGFB1/TM7SF2/POR/APOE/CD81/FASN/AKT1/NR1H2/PRKCD/CTDNEP1/SCAP/SREBF2/NFYC/HELZ2/SMPD2/ACADVL/C1QTNF2/SIN3B/SOCS3/MVD/TNFRSF1A/DGKZ/SREBF1/GPS2/SCD/EPHX2/LAMTOR1/KLF4/AKT2/WDTC1/EIF6/MID1IP1/FAM3A/RXRA/STUB1/ANGPTL4/MVK/CCL21/SPHK1/PMVK/DGKQ/PTK2B/SOCS1/MTMR3/ADIPOR1/SMARCD3/ADRA2A/SIK1/PDK2/NCOR2/SP1/ORMDL3/VDR/IGFBP7/TBL1X/WNT4/SLC27A1/NPC2/H2AFY/ERLIN2/PNPLA2/…
GO:0050673	GO:0050673	epithelial cell proliferation	361	0.33376	1.47408	0.00172414	0.0150942	0.00886863	2464	tags=21%, list=12%, signal=19%	ERBB2/IGFBP4/HRAS/KRT2/IRF6/ZFP36L1/ECM1/TGFB1/IGFBP5/ZNF580/FOXN1/STAT6/TP63/MMP14/CCND1/MDK/APOE/PLXNB3/GRN/AKT1/EGFL7/SLURP1/BAX/EPHA2/B4GALT1/TBX1/PRKD2/SFRP1/RPS6KA1/NGFR/MEN1/ZFP36/HTRA1/ID1/CD34/CDKN1C/CDH3/GPX1/BAD/NUPR1/DEAF1/SMAD3/LGR4/STAT3/HES5/SERPINF1/VEGFA/SULF2/KDF1/SGPP2/TGM1/COL8A2/ZNF703/EPPK1/GLUL/SMO/NR2F2/PYGO2/SP1/BCL2L2/HMOX1/VDR/LIMS2/OSR1/ACVRL1/SOX2/FLT4/TGFA/LOXL2/DLX5…
GO:0018108	GO:0018108	peptidyl-tyrosine phosphorylation	327	0.334008	1.4566	0.00176678	0.0150942	0.00886863	4068	tags=31%, list=20%, signal=26%	ERBB2/CD74/FGFR3/MAP2K2/TP53/TGFB1/PPP2R1A/HSF1/CSF3/ZGPAT/CD81/PRKCD/SHC1/EPHB3/THY1/EPHB6/EPHA2/DYRK1B/MVP/SOCS3/SFRP1/CBLC/TIE1/TNFRSF1A/ROR2/ABL1/TYK2/TNFRSF18/ICAM1/MAPK3/ACE/STAP2/PTPN6/MST1R/MIF/STAT3/CD44/HES5/DMTN/TMEM102/CHMP6/LMTK2/VEGFA/FES/TYRO3/ARRB2/DGKQ/IL6R/PTK2B/TNK2/SOCS1/CSF1R/EHD4/CRLF1/HYAL2/ZAP70/ADRA2A/FGF8/NF2/FLT4/ITGB2/TGFA/CSPG4/PRKCZ/PAK2/SFRP2/VPS25/NTRK1/ITGA5/GAS6/…
GO:0050878	GO:0050878	regulation of body fluid levels	472	0.334113	1.50381	0.00176678	0.0150942	0.00886863	4159	tags=29%, list=20%, signal=24%	COMP/COL1A1/FLNA/AQP3/ZNF385A/KRT1/HMG20B/KRT16/HSPB1/GNAI2/ALOX12B/FBLN1/APRT/TP63/CCND1/DOCK6/APOE/TMEM79/DGKA/CD177/PRKCD/EHD2/ZBTB7B/FIBP/GPI/GNA15/P2RY2/MYL9/CD9/SCNN1B/C1QTNF1/EHD1/DGKZ/CD34/MAPK3/MYH9/CAPZB/GNA11/PTPN6/MICAL1/SERPINE1/IRF2/MFN2/PRKACA/DMTN/ILK/TRPV4/VEGFA/MAFK/KDF1/NOS3/TYRO3/ARRB2/PRKAR1B/DGKQ/RAC1/MAFG/HYAL2/MLLT6/ADCY9/AKAP1/HSD11B2/SERPING1/ADRA2A/NFE2/NCOR2/ITPR3/PLAU…
GO:0052547	GO:0052547	regulation of peptidase activity	359	0.334318	1.47417	0.0017452	0.0150942	0.00886863	3204	tags=28%, list=15%, signal=24%	YWHAE/CTSD/ECM1/EFNA3/FBLN1/ATP13A2/SPINT1/HSF1/POR/IFI6/TP63/ADRM1/GRN/AKT1/PCOLCE/RCN3/PML/BAX/CRYAB/UBE2Z/RPS6KA1/PYCARD/NGFR/BAK1/NDUFA13/PEBP1/MAPK3/CIDEB/KLF4/GPX1/TBC1D10A/BOK/PRDX5/BAD/MICAL1/AKIRIN2/FURIN/SIAH2/TIMP3/SMAD3/SERPINE1/FIS1/STAT3/LGALS9/CD44/DHCR24/MAPT/VEGFA/COL7A1/SOX7/PAPLN/HIP1R/ARRB2/CDKN2D/PRR7/UBXN1/AGER/TIMP1/MIR205/TRAF2/APLP2/PINK1/TIMP2/AQP1/NLRP1/SOX2/HIP1/RHOA/B…
GO:0007264	GO:0007264	small GTPase mediated signal transduction	447	0.334582	1.49867	0.00175747	0.0150942	0.00886863	4062	tags=33%, list=19%, signal=27%	EPS8L2/ARHGDIA/HRAS/NUP62/TRIM28/TP53/VANGL2/ABR/ADGRG1/TRIP10/RHOV/RAPGEFL1/SH2D3C/RTKN/EPS8L1/RHOG/DOCK6/APOE/RALGDS/GBF1/RHOD/BCR/PIK3R2/SHC1/TSC2/RAC3/ITGA3/SIPA1/ARHGAP35/ARHGEF11/MYO9B/WASF2/PLD2/NGFR/ABL1/KCTD13/FLOT1/RRAS/CFL1/RAPGEF1/PLEKHG5/PLEKHG6/SIAH2/FGD1/CDKN1A/ARHGAP23/MFN2/ARHGAP1/ARHGAP4/DHCR24/SH2D3A/RGL2/ARFIP2/RHOC/SH3BP1/ARHGEF19/ARHGEF16/PLEKHG2/ARHGAP30/CHP1/RAC1/CNKSR1/TN…
GO:0016049	GO:0016049	cell growth	430	0.334698	1.49655	0.00173913	0.0150942	0.00886863	3277	tags=25%, list=16%, signal=21%	ERBB2/IGFBP4/SEMA3F/TP53/LTBP4/EIF4G1/LAMB2/ADAM15/TGFB1/RARG/IGFBP5/PPP2R1A/ANAPC2/PPP1R9B/G6PD/MMP14/BAP1/OSGIN1/APOE/AKT1/CDA/CRABP2/CLSTN1/PML/CRYAB/SIPA1/BRAT1/KLHL22/ARHGEF11/TNFRSF12A/PLXNA3/SFRP1/RPS6KA1/CPNE1/TAOK2/ABL1/NDUFA13/LAMTOR1/SMARCA4/DNAJB2/EXOSC4/CDKN1A/KMT2D/SMAD3/DVL1/LRP1/EXTL3/ARHGAP4/FHL1/MAPT/ILK/VEGFA/SPHK1/PIN1/MEGF8/CDKN2D/FBLN5/PTK2B/CLSTN3/RTN4R/BCAR1/HYAL2/ADIPOR1/…
GO:0031330	GO:0031330	negative regulation of cellular catabolic process	225	0.335699	1.40645	0.0113636	0.0429275	0.0252222	3268	tags=26%, list=16%, signal=22%	PKP3/TP53/PKP1/LARP1/TSPO/EIF4G1/BAG6/ATP13A2/AKT1/GIPC1/RBM10/SNRNP70/PML/TSC2/KLHL22/CIRBP/USP36/WDR6/SMARCC1/ZFP36/MAPKAPK2/YBX1/SGTA/FURIN/NUPR1/CTSA/TIMP3/STAT3/PHF23/GOLGA2/POLDIP2/DHX34/UBXN1/TIMP1/PINK1/HMOX1/CLEC16A/RASIP1/THRAP3/HSP90AB1/CHMP4B/TBC1D14/RRAGA/TAB3/ELAVL1/PAM16/YBX3/HTRA2/CPTP/CST3/OS9/MAPK14/UBAC2/DDRGK1/SIRT6/ALAD/KIF25/GSK3A
GO:1902105	GO:1902105	regulation of leukocyte differentiation	252	0.336743	1.43295	0.00369686	0.0224527	0.0131922	3189	tags=25%, list=15%, signal=21%	ZFP36L2/ERBB2/CD74/CLPTM1/ZFP36L1/TGFB1/ATP6AP1/FOXN1/SOX13/MMP14/C1QC/MDK/TFE3/ZBTB7B/FLT3LG/ACIN1/AP3D1/SFRP1/ROR2/ABL1/TNFRSF18/FOS/IL4R/PTPN6/BAD/ESRRA/LGALS9/ZBTB16/TMEM176A/IRF7/IL1RL2/RARA/FES/ZMIZ1/TRIB1/TOB2/FSTL3/SOCS1/CTNNBIP1/AGER/ZAP70/INPP5D/SMAD7/TMEM176B/FOXP3/PRKCZ/RHOA/NFKBID/PIAS3/SART1/ZFPM1/GAS6/TLR9/CCL19/KAT2A/CD4/IL34/HLA-G/GLI2/PRELID1/JUN/TESC/MYC
GO:0031348	GO:0031348	negative regulation of defense response	185	0.336972	1.38513	0.0095057	0.0383232	0.0225169	2987	tags=28%, list=14%, signal=24%	APOD/KRT1/ABR/LDLR/GSTP1/MDK/METRNL/APOE/GRN/BCR/NR1H2/PRKCD/SOCS3/CX3CL1/PYCARD/TNFRSF1A/GPS2/HTRA1/KLF4/GPX1/RNF26/SIRPA/NLRX1/FAM3A/SMAD3/LGALS9/SERPINF1/MVK/TYRO3/ARRB2/CACTIN/MAPK7/AGER/SERPING1/MIR205/NPLOC4/PGLYRP1/FOXP3/TKFC/FNDC4/PPARG/ABCD1/APOA1/TNFRSF1B/HLA-F/CHID1/SHARPIN/CCK/IL20RB/CXCL17/HLA-G
GO:0051701	GO:0051701	interaction with host	193	0.337211	1.39714	0.0130354	0.0466207	0.0273922	2556	tags=24%, list=12%, signal=22%	CD74/TRIM28/BCL2L1/LAMP1/LDLR/TGFB1/P4HB/ALYREF/NECTIN4/NECTIN2/THOC6/VPS37B/CD81/SLC52A2/PML/EPHA2/NECTIN1/EXOC7/ICAM1/BAD/TRIM11/SLC1A5/SMAD3/LGALS9/RXRA/CDH1/TYRO3/SIVA1/IFITM3/PC/HYAL3/VPS18/HYAL2/PVR/SLC25A6/DAG1/PABPN1/CHMP4B/IFITM2/KPNA6/F11R/ITGA5/GRK2/SLC52A1/RRAGA/GAS6/TYMS
GO:0048167	GO:0048167	regulation of synaptic plasticity	164	0.337564	1.37013	0.013308	0.0468109	0.0275039	4768	tags=38%, list=23%, signal=29%	HRAS/VAMP2/ANAPC2/RGS14/BAIAP2/APOE/GIPC1/CX3CL1/NRGN/ABL1/NFATC4/MAPT/RARA/PRRT2/RIN1/PTK2B/CDC20/AGER/NCDN/ITPR3/PPFIA3/MECP2/PRKCZ/ARC/EIF4EBP2/ADGRB1/NSG1/GRIN2D/SHISA7/ABHD6/KAT2A/SCT/SHANK3/DBN1/NSMF/SRF/GRIN1/HRH2/SYNGR1/P2RX3/RAB3A/DLG4/CYP46A1/MAPK1/PICK1/CRTC1/SSH1/NTRK2/SYNGAP1/STX4/SYT12/NEURL1/GIP/SYT7/PSEN1/RAB8A/SQSTM1/JPH3/ITPKA/ADCY8/ADORA1/CRH
GO:0043405	GO:0043405	regulation of MAP kinase activity	304	0.337824	1.46823	0.00178891	0.0150942	0.00886863	3246	tags=27%, list=16%, signal=23%	ERBB2/CD74/HRAS/NUP62/MAP2K2/VANGL2/TGFB1/PPP2R1A/RGS14/PKN1/GSTP1/APOE/CD81/TP73/PRKCD/SHC1/GPS1/MAP3K6/C1QTNF2/DUSP1/TRAF7/MAPK8IP3/SFRP1/CBLC/HGS/DUSP7/ROR2/TAOK2/GPS2/DVL3/MAPK3/MAPKAPK2/RAPGEF1/MAP4K2/PTPN6/MST1R/MIF/SPRED2/BMP7/PEA15/MAPKAPK3/ILK/VEGFA/TRIB1/WNT7B/PTK2B/GADD45B/MAPK11/HYAL2/AGER/ADRA2A/TRAF2/DUSP5/TGFA/CSPG4/SMPD1/SHC2/SFRP2/ERP29/NTRK1/TAB1/GDF15/TAB3/GADD45G/TRIB2/TLR9/MA…
GO:0031346	GO:0031346	positive regulation of cell projection organization	340	0.338007	1.48446	0.0017301	0.0150942	0.00886863	3165	tags=26%, list=15%, signal=22%	EPS8L2/ARHGDIA/HRAS/CDC42EP1/PFN1/SF3A2/MARK2/FSCN1/CDC42EP5/NDRG4/ANAPC2/KATNB1/BAIAP2/EPS8L1/FZD1/LCN2/MDK/APOE/PLXNB3/GRN/CRABP2/AP2A1/ITGA3/AGRN/ARHGAP35/TNFRSF12A/CDC42EP4/CX3CL1/WASF2/NGFR/CORO1B/DVL3/STK25/MARK4/RAPGEF1/PROM2/BMP7/DVL1/LRP1/MAPT/ILK/STMN2/SERPINF1/VEGFA/CCL21/CUX1/FES/MEGF8/MOB2/RAC1/PTK2B/PALM/GDI1/PTK7/SMURF1/BCAS3/DPYSL3/METRN/FOXO6/TRAK1/PLXNB2/RASAL1/COBL/OBSL1/RHOA/C…
GO:0043393	GO:0043393	regulation of protein binding	207	0.338039	1.4093	0.00746269	0.0337918	0.0198545	3204	tags=29%, list=15%, signal=24%	CARM1/PTPRF/MARK2/ADAM15/HSF1/RFNG/CSF3/APOE/LDOC1/AKT1/SYMPK/PRKCD/BAX/PPP1CA/MEN1/TMEM173/BAK1/ABL1/ID1/MAPK3/GTF2F1/ACE/NFATC4/DNAJB2/FLOT1/PRMT7/DVL1/AMFR/LRP1/PRKACA/BAMBI/STUB1/DDX11/GOLGA2/HIP1R/ARRB2/PIN1/TRAF4/PLXND1/PLK1/CTNNBIP1/HDAC5/SMARCD3/TRAF2/HSP90AB1/MAPRE3/CAMK1/ADD1/TICAM1/ZFPM1/PHLDA2/PEX14/PPP2CB/NES/AURKB/SRC/EP300/BMP2/SLPI
GO:0001933	GO:0001933	negative regulation of protein phosphorylation	363	0.338607	1.4948	0.00172414	0.0150942	0.00886863	3261	tags=29%, list=16%, signal=25%	EMILIN1/NUP62/FKBP8/AKT1S1/CEBPA/EIF4G1/TGFB1/HSPB1/PPP2R1A/RGS14/NDRG2/FBLN1/ENG/EZR/PKN1/ZGPAT/GSTP1/APOE/AKT1/PRKCD/PIK3R2/PPP2R5D/TSC2/THY1/GPS1/BAX/MVP/SOCS3/DUSP1/SFRP1/MYADM/PYCARD/CBLC/MEN1/DUSP7/BAK1/ABL1/GPS2/CTDSP1/LEMD2/CDKN1C/KLF4/SIRPA/RAPGEF1/LRP5/PTPN6/MICAL1/SPRED2/CDKN1A/TIMP3/BMP7/DVL1/DMTN/PSCA/CHMP6/ILK/ARRB2/PIN1/PRKAR1B/TRIB1/CACTIN/DGKQ/CDKN2D/CHP1/PID1/SOCS1/GADD45B/PLK1/…
GO:0016051	GO:0016051	carbohydrate biosynthetic process	185	0.338875	1.39295	0.0095057	0.0383232	0.0225169	2915	tags=24%, list=14%, signal=21%	SLC25A1/TGFB1/FUT3/TKT/G6PD/ALDOA/TPI1/AKT1/AP2A1/GYS1/B3GNT8/GPI/SLC25A11/C1QTNF2/B4GALT1/PPP1CA/CRTC2/AKT2/IMPA2/SLC25A10/WDR5/FAM3A/ST6GALNAC6/SORD/DGKQ/PTK2B/PC/G6PC3/SIK1/ISYNA1/PDK2/PGP/ALDOC/PTH1R/ATF3/ENO2/PGAM2/PPP1R3C/SESN2/DGAT2/KAT2A/B3GNT4/MPDU1/GAPDH
GO:0032102	GO:0032102	negative regulation of response to external stimulus	286	0.339031	1.46546	0.00178253	0.0150942	0.00886863	4316	tags=35%, list=21%, signal=28%	KREMEN1/APOD/KRT1/ABR/LDLR/NBL1/SIGIRR/GSTP1/MDK/METRNL/APOE/GRN/BCR/PRKCD/SOCS3/DUSP1/PLXNA3/CX3CL1/CD9/PYCARD/CORO1B/C1QTNF1/TNFRSF1A/GPS2/HTRA1/CD34/KLF4/GPX1/RNF26/MMP28/SIRPA/NLRX1/MIF/CDKN1A/FAM3A/SMAD3/DVL1/SERPINE1/SERPINF1/MVK/NOS3/TYRO3/TRIB1/CACTIN/NFKBIL1/MAPK7/EPPK1/CHD8/RTN4RL1/NOTCH1/RTN4R/AGER/SERPING1/MIR205/PLAU/NPLOC4/PTPRS/PGLYRP1/FOXP3/WNT4/PLAUR/ALOX12/TKFC/FNDC4/PPARG/ABCD1…
GO:0097237	GO:0097237	cellular response to toxic substance	213	0.339093	1.4136	0.00931099	0.0383232	0.0225169	3762	tags=31%, list=18%, signal=26%	SPI1/KDM6B/GPX3/MAP1LC3A/ZNF580/DUOX1/STAT6/HSF1/LCN2/GSTP1/APOE/RELA/PRKCD/SIGMAR1/LTC4S/ABL1/KLF4/GPX1/STK25/SIRPA/PRDX5/BAD/BMP7/FIS1/GPX4/SPHK1/DDX11/NOS3/MAPK13/MAPK7/FBLN5/SZT2/PINK1/HMOX1/PPIF/CYGB/AQP1/ENDOG/DUOX2/GSTZ1/NTRK1/ADIRF/DHFR/RDH12/PCGF2/SESN2/EGR1/ABTB2/TPO/CST3/HDAC6/RIPK3/GSTK1/RHOB/SRC/DAXX/GSTM1/UBIAD1/PPP5C/TXNRD2/CBX8/HBQ1/GSTM2/APOA4/NFKB1/PSAP/LOXHD1
GO:0048880	GO:0048880	sensory system development	344	0.339567	1.4937	0.00171821	0.0150942	0.00886863	4346	tags=29%, list=21%, signal=24%	TFAP2A/FKBP8/LAMB2/TGFB1/RARG/MFAP2/FZR1/ZNF513/SCO2/WNT5B/THY1/COL5A1/BAX/CRYAB/IRX5/EPHA2/ARHGAP35/TCIRG1/NECTIN1/NINJ1/PPP1R13L/TSKU/BAK1/TBX2/C1QA/MAX/SMARCA4/CDKN1C/KLF4/LRP5/BMP7/SMAD3/STAT3/MFN2/HES5/RARA/RXRA/SERPINF1/VEGFA/ARID1A/COL8A2/WNT7B/NAGLU/IMPDH2/PYGO2/RAB11FIP4/SMARCD3/NF2/ACVRL1/SOX2/C12orf57/CDK4/PDGFRB/FOXC1/LHX1/SKI/GRHL3/AQP5/TFAP2B/CST3/SRF/RAX/NES/SLC25A25/CLCN2/SDK2/JUN…
GO:0007409	GO:0007409	axonogenesis	380	0.339977	1.50347	0.00174825	0.0150942	0.00886863	4089	tags=29%, list=20%, signal=23%	ERBB2/ARHGDIA/SPTBN2/SEMA3F/VANGL2/MARK2/LAMB2/VASP/ANAPC2/GPC1/BAIAP2/TUBB3/EZR/APOE/GRB7/CRABP2/SHC1/EPHB3/THY1/S100A6/ARHGAP35/TNFRSF12A/PLXNA3/NECTIN1/DOK4/EVL/NGFR/TSKU/PDLIM7/TAOK2/ABL1/PTPRA/MAPK3/STK25/FLOT1/BMP7/DVL1/LRP1/UNC5B/ARHGAP4/MAPT/ILK/VEGFA/MEGF8/MAPK7/CSF1R/RTN4R/SZT2/GDI1/NRTN/FGF8/METRN/TRAK1/PTPRS/ARTN/COBL/PITPNA/DAG1/HSP90AB1/BOC/RHOA/PSPN/SLIT3/DLX5/STK11/NTRK1/AUTS2/ADG…
GO:0035303	GO:0035303	regulation of dephosphorylation	192	0.340152	1.40847	0.00932836	0.0383232	0.0225169	3363	tags=28%, list=16%, signal=24%	YWHAE/PPP1R16A/CAMSAP3/LMTK3/PPP1R14B/TGFB1/PPP1R15A/PPP2R1A/GNAI2/CABIN1/DMPK/PPP1R9B/PTPA/SYMPK/PRKCD/PPP2R5D/B3GAT3/PPP1R10/MYO1D/SMAD3/LMTK2/SMG5/PIN1/CHP1/PPP2R2C/MTMR3/ELL/PPP1R37/PINK1/YWHAB/SH3RF2/SFI1/PPP6R1/PPP2R3B/HSP90AB1/SMPD1/PPME1/PPP1R3C/IGFBP3/PDGFRB/PPP1R35/CRY2/ENSA/PTBP1/SMG6/NSMF/IKBKB/RIPK3/MTMR1/PPP2R5B/BMP2/SMG7/FKBP15/DLG2
GO:0022604	GO:0022604	regulation of cell morphogenesis	412	0.340328	1.51527	0.00174216	0.0150942	0.00886863	3601	tags=27%, list=17%, signal=23%	ARHGDIA/CDC42EP1/FLNA/MYH14/ACTN4/MARK2/WDR1/CDC42EP5/ANAPC2/FBLN1/BAIAP2/MOV10/EZR/PLXNB1/ALDOA/MDK/APOE/FBLIM1/CRABP2/EPHB3/THY1/RAC3/BCL9L/ARHGAP35/CALR/TNFRSF12A/PLXNA3/CDC42EP4/MYADM/NGFR/CORO1B/TAOK2/ABL1/ICAM1/ID1/DVL3/NFATC4/STK25/MYH9/PLEKHO1/CFL1/CAPZB/FGD1/DVL1/CORO1A/CD44/LRP1/FMNL1/ARHGAP4/DMTN/MAPT/BAMBI/ILK/VEGFA/CUX1/FES/DIAPH1/MEGF8/PALMD/PARVB/RAC1/PTK2B/CSF1R/PALM/ITGA7/RTN4R/G…
GO:0001701	GO:0001701	in utero embryonic development	327	0.342299	1.49276	0.00176678	0.0150942	0.00886863	3006	tags=26%, list=14%, signal=23%	SOX18/FOSL1/TRIM28/TP53/XAB2/EPAS1/ZFP36L1/BCL2L1/CEBPA/HS3ST6/JUNB/MDFI/SPINT1/HSF1/HS6ST1/AKT1/GJB3/KRT8/SUPT6H/SOCS3/GJB5/ST14/TIE1/CNOT3/MBD3/YBX1/APBA3/CDKN1C/JAG2/WDTC1/MYH9/HCFC1/KEAP1/BMP7/SMAD3/PEMT/MFN2/RRP7A/EPN1/RXRA/VEGFA/NOS3/ZMIZ1/PLCD1/CHD8/WNT7B/ANKRD11/MAFG/ELL/SMO/NR2F2/PYGO2/PTPN18/MGAT1/ETV2/CMTM3/PLCD3/ACVRL1/SEC24C/ENDOG/PLOD3/ASCL2/PRMT1/ADD1/ETNK2/TFEB/TAB1/PSMC3/NMT1/PCG…
GO:0051493	GO:0051493	regulation of cytoskeleton organization	442	0.342354	1.53475	0.00174216	0.0150942	0.00886863	3778	tags=32%, list=18%, signal=27%	ARHGDIA/SPTBN2/HRAS/FLNA/PFN1/NUP62/SORBS3/CAMSAP3/VANGL2/MARK2/FSCN1/WDR1/TGFB1/CDC42EP5/PXN/VASP/CAPG/KATNB1/BAIAP2/CSF3/PLXNB1/MDK/RHOD/MLST8/PRKCD/ARPC4/CDK2AP2/ARHGAP35/PLXNA3/CDK10/MYO1C/CX3CL1/NUMA1/WASF2/FBXW5/TACC3/EVL/SFRP1/MYADM/CHMP1A/PYCARD/CORO1B/TAOK2/ABL1/ELN/ICAM1/ID1/MAPK3/CFL1/MARK4/MID1IP1/SMAD3/ASAP3/CORO1A/LRP1/DMTN/SDC4/MAPT/DCTN1/ILK/FCHSD1/RHOC/STMN2/TRPV4/CCL21/SH3BP1/FE…
GO:1901214	GO:1901214	regulation of neuron death	289	0.342558	1.48091	0.00179211	0.0150942	0.00886863	3418	tags=29%, list=16%, signal=25%	TFAP2A/TMEM259/HRAS/TP53/UBE2M/AKT1S1/BCL2L1/EIF4G1/ATP13A2/G6PD/HSF1/FZD1/CSF3/MDK/APOE/GRN/AKT1/BAX/CX3CL1/SIGMAR1/NONO/C1QA/ABL1/FOS/CD34/GPX1/NFATC4/CLN3/BOK/BAD/NUPR1/FIS1/STAT3/CORO1A/LRP1/UNC5B/DHCR24/MAPT/ILK/SERPINF1/TYRO3/DNAJC5/ARRB2/PIN1/CDC34/CHP1/PTK2B/CRLF1/TRAF2/FGF8/PINK1/HMOX1/ELK1/ITGB2/MECP2/HSP90AB1/RHOA/CHMP4B/NTRK1/TNFRSF1B/AMBRA1/HYOU1/EGR1/HLA-F/HTRA2/TFAP2B/NSMF/GRIN1/SI…
GO:0001654	GO:0001654	eye development	335	0.343157	1.50288	0.0017452	0.0150942	0.00886863	4346	tags=30%, list=21%, signal=24%	TFAP2A/FKBP8/LAMB2/TGFB1/RARG/MFAP2/FZR1/ZNF513/SCO2/WNT5B/THY1/COL5A1/BAX/CRYAB/IRX5/EPHA2/ARHGAP35/TCIRG1/NECTIN1/NINJ1/PPP1R13L/TSKU/BAK1/TBX2/MAX/SMARCA4/CDKN1C/KLF4/LRP5/BMP7/SMAD3/STAT3/MFN2/HES5/RARA/RXRA/SERPINF1/VEGFA/ARID1A/COL8A2/WNT7B/NAGLU/IMPDH2/PYGO2/RAB11FIP4/SMARCD3/NF2/ACVRL1/SOX2/C12orf57/CDK4/PDGFRB/FOXC1/LHX1/SKI/GRHL3/AQP5/TFAP2B/CST3/SRF/RAX/NES/SLC25A25/CLCN2/SDK2/JUN/RING…
GO:0150063	GO:0150063	visual system development	339	0.343651	1.50772	0.00172712	0.0150942	0.00886863	4346	tags=30%, list=21%, signal=24%	TFAP2A/FKBP8/LAMB2/TGFB1/RARG/MFAP2/FZR1/ZNF513/SCO2/WNT5B/THY1/COL5A1/BAX/CRYAB/IRX5/EPHA2/ARHGAP35/TCIRG1/NECTIN1/NINJ1/PPP1R13L/TSKU/BAK1/TBX2/C1QA/MAX/SMARCA4/CDKN1C/KLF4/LRP5/BMP7/SMAD3/STAT3/MFN2/HES5/RARA/RXRA/SERPINF1/VEGFA/ARID1A/COL8A2/WNT7B/NAGLU/IMPDH2/PYGO2/RAB11FIP4/SMARCD3/NF2/ACVRL1/SOX2/C12orf57/CDK4/PDGFRB/FOXC1/LHX1/SKI/GRHL3/AQP5/TFAP2B/CST3/SRF/RAX/NES/SLC25A25/CLCN2/SDK2/JUN…
GO:0032386	GO:0032386	regulation of intracellular transport	381	0.345883	1.53075	0.00174216	0.0150942	0.00886863	2364	tags=21%, list=11%, signal=19%	YWHAE/ERBB2/HRAS/GAS1/FLNA/NUCB1/NUP62/MAP2K2/TRIM28/TP53/APOD/VAMP2/LAMP1/JUP/RAB11B/TGFB1/RANGAP1/NDRG4/ATP13A2/PTPN23/EZR/BAP1/CPLX1/CD81/GIPC1/PRKCD/PIK3R2/EHD2/SREBF2/CRYAB/SUPT6H/USP36/MYO1C/ABCA2/NUMA1/STXBP2/B3GAT3/EHD1/SREBF1/TM9SF4/IL4R/MAPK3/CDH3/AKT2/AAAS/PLK3/SMAD3/DVL1/FIS1/LGALS9/PRKACA/ARHGAP1/DMTN/CDH1/FES/GRIPAP1/CHP1/UBE2J2/REEP6/PTPN14/VPS18/HYAL2/SMO/GDI1/OAZ2/UNC13D/BCAS3/PI…
GO:1901342	GO:1901342	regulation of vasculature development	300	0.345898	1.50385	0.0017762	0.0150942	0.00886863	4364	tags=34%, list=21%, signal=28%	ERBB2/HSPG2/EMILIN1/KRT1/ECM1/JUP/PKM/HSPB1/EFNA3/ENG/RAMP2/MDK/GRN/COL4A2/PML/EPHA2/TNFRSF12A/CX3CL1/PRKD2/SFRP1/NGFR/TIE1/HGS/ABL1/ID1/CD34/KLF4/RRAS/BMP7/SERPINE1/STAT3/EPN1/SERPINF1/VEGFA/ANGPTL4/SPHK1/NOS3/STIM1/CREB3L1/MAPK7/IL6R/PTK2B/NOTCH1/PLXND1/GLUL/GTF2I/HDAC5/MIR205/SP1/ADGRA2/HMOX1/ACVRL1/AQP1/ITGB2/WNT4/MECP2/RHOA/SFRP2/RAPGEF3/JMJD8/PPARG/PAK4/ITGA5/ADGRB1/EGR1/FOXC1/ADGRB2/AGO2/R…
GO:0006066	GO:0006066	alcohol metabolic process	322	0.345954	1.50616	0.00178891	0.0150942	0.00886863	3722	tags=28%, list=18%, signal=23%	ALDH3B2/LSS/CEBPA/LDLR/TM7SF2/SULT2B1/CYB5R3/G6PD/POR/FDXR/APOE/DEGS2/FASN/SCAP/SREBF2/NFYC/DGAT1/PLCH2/ACADVL/INPP5A/STARD3/MVD/ITPKC/SREBF1/SCD/ACLY/EPHX2/SULT1A1/IMPA2/CYP11A1/DHCR24/RXRA/MVK/SPHK1/ALDH2/PLCB3/SORD/SGPP2/PMVK/DGKQ/PLCD1/LCAT/PTK2B/SULT1A2/INPP5D/ISYNA1/OSBPL5/SP1/SNX17/IP6K1/GALK1/VDR/PGP/PLCD3/PTH1R/CEL/ALDH3B1/WNT4/PPIP5K1/MECP2/NPC2/SMPD1/ERLIN2/INPPL1/DHCR7/DHFR/APOA1/RDH1…
GO:1903829	GO:1903829	positive regulation of cellular protein localization	299	0.346848	1.50615	0.00178253	0.0150942	0.00886863	4197	tags=33%, list=20%, signal=27%	YWHAE/ERBB2/HRAS/FLNA/NUP62/TRIM28/TP53/VAMP2/ABHD17A/JUP/TGFB1/EZR/TP63/BAP1/RHOG/CD81/AKT1/TP73/PRKCD/PIK3R2/SREBF2/ITGA3/EPHA2/USP36/MYO1C/NUMA1/ABCA7/VPS28/B3GAT3/NGFR/TM9SF4/TFDP1/AKT2/MARK4/BAD/PLK3/MCRS1/SMAD3/FIS1/LRP1/PRKACA/MAPT/CDH1/ARHGEF16/CHP1/UBE2J2/PLK1/HYAL2/SMO/OAZ2/BCAS3/PINK1/YWHAB/DMAP1/RAMP3/ITGB2/CEP131/MAVS/HSP90AB1/BCAP31/CAMK1/STK11/RAPGEF3/NMT1/SESN2/GAS6/PCNT/HTRA2/PAR…
GO:0070997	GO:0070997	neuron death	321	0.347119	1.51155	0.00178571	0.0150942	0.00886863	3418	tags=30%, list=16%, signal=25%	TFAP2A/TMEM259/HRAS/TP53/UBE2M/AKT1S1/BCL2L1/EIF4G1/ATP13A2/G6PD/HSF1/FZD1/TP63/CSF3/MDK/APOE/GRN/AKT1/BAX/ATN1/CX3CL1/SIGMAR1/NGFR/NONO/C1QA/ABL1/FOS/CD34/MAX/GPX1/NFATC4/CLN3/AKT2/BOK/BAD/NUPR1/FIS1/STAT3/CORO1A/LRP1/UNC5B/DHCR24/MAPT/ILK/SERPINF1/TYRO3/DNAJC5/ARRB2/PIN1/CDC34/CHP1/PTK2B/CRLF1/TRAF2/FGF8/PINK1/HMOX1/ELK1/NLRP1/ENDOG/ITGB2/MECP2/HSP90AB1/RHOA/CHMP4B/NTRK1/TNFRSF1B/AMBRA1/HYOU1/E…
GO:0021700	GO:0021700	developmental maturation	250	0.347618	1.47878	0.00185185	0.0150942	0.00886863	3864	tags=28%, list=19%, signal=23%	SOX18/FGFR3/PFN1/EPAS1/CEBPA/PPP2R1A/ANAPC2/RYR1/G6PD/PLXNB1/TMEM79/ZBTB7A/CLSTN1/RAC3/AGRN/AP1M1/IRX5/AP3D1/CX3CL1/C1QA/CDKN1C/CDH3/NFATC4/CDC25B/CDKN1A/PRKACA/HES5/VEGFA/CCL21/DCHS1/NPPC/PTK2B/PALM/CDC20/FAM210B/FAM20C/ACVRL1/PTH1R/DAG1/LGI4/THBS3/MECP2/RHOA/CDK5R2/PPARG/MSX2/TFCP2L1/TYMS/CCL19/SPTBN4/ANGPTL8/YWHAZ/GRIN1/SHANK1/BMP2/RND1/TRPC4AP/KCNIP2/POU2F2/RAB3A/DLG4/CDH5/SOX8/RERE/PICK1/BLO…
GO:0072659	GO:0072659	protein localization to plasma membrane	230	0.347676	1.46043	0.00190476	0.0150942	0.00886863	4362	tags=33%, list=21%, signal=26%	PKP3/FLNA/BSG/VAMP2/BCL2L1/JUP/TGFB1/FLOT2/EZR/RAMP2/MMP14/RHOG/CD81/AKT1/EHD2/TSPAN14/ITGA3/EPHA2/MYADM/TNFRSF1A/PACS1/LAMA5/GGA3/AKT2/FLOT1/AP2M1/ARFRP1/LRP1/GAK/CDH1/TTC7A/ARHGEF16/DCHS1/GRIPAP1/PID1/PIP5K1A/GGA1/KRT18/PALM/SMURF1/TSPAN5/GORASP1/AFDN/RAMP3/PRKCZ/LYPD1/F11R/SLC9A3R1/GAS6/NSG1/SPTBN4/CSK/IKBKB/CLIP3/TESC/CACNB3/TMEM150A/DLG1/STAC3/TMEM88/RAMP1/INPP5K/NKD2/PPIL2/PTCH1/TSPAN15/MAP…
GO:0048608	GO:0048608	reproductive structure development	406	0.347929	1.54929	0.00173611	0.0150942	0.00886863	3269	tags=25%, list=16%, signal=21%	FLNA/FOSL1/TRIM28/DLX3/BSG/EPAS1/ZFP36L1/BCL2L1/CEBPA/ADAM15/ADGRG1/RARG/CRIP1/JUNB/MDFI/SPINT1/HSF1/TP63/MMP14/CCND1/HS6ST1/LDOC1/AKT1/GJB3/KRT8/BAX/IRX5/SOCS3/GJB5/ST14/ALOX15B/SMARCC1/SFRP1/CITED2/MEN1/BAK1/ROR2/HTRA1/ICAM1/MAPK3/CDKN1C/BOK/NUPR1/BMP7/LGR4/DHCR24/RARA/RXRA/SERPINF1/VEGFA/ARID1A/NOS3/TYRO3/ARRB2/MEA1/PLCD1/FSTL3/SOX15/WNT7B/HYAL3/NR2F2/DMRTA1/FGF8/ETV2/BCL2L2/VDR/OSR1/PATZ1/PLC…
GO:0097305	GO:0097305	response to alcohol	220	0.348034	1.4508	0.00573614	0.029065	0.0170772	3941	tags=30%, list=19%, signal=25%	FOSL1/FOSB/BCL2L1/LARP1/SPI1/EIF4G1/JUP/ADAM15/TGFB1/G6PD/CSF3/CCND1/GSTP1/AKT1/CLDN7/ABCA2/SFRP1/GRAMD1A/BAK1/ICAM1/FOS/KLF4/BAD/CDKN1A/PEMT/STAT3/EIF4EBP1/RARA/CCL21/CDH1/PMVK/NPPC/PTK2B/SMO/OSBPL7/HAMP/ADCY6/DMAP1/DAG1/IGFBP7/OXT/RHOA/SLIT3/PPARG/HTR3A/TYMS/CDK4/EEF2/CCL19/SPHK2/RECQL5/GRIN1/ALAD/CAD/SDF4/SLC2A4/MGMT/IL13/CYP2E1/DBH/CTNNA1/DRD4/CLDN3/TNC/PTCH1/GNB1
GO:0061458	GO:0061458	reproductive system development	409	0.348245	1.54841	0.00175439	0.0150942	0.00886863	3269	tags=25%, list=16%, signal=21%	FLNA/FOSL1/TRIM28/DLX3/BSG/EPAS1/ZFP36L1/BCL2L1/CEBPA/ADAM15/ADGRG1/RARG/CRIP1/JUNB/MDFI/SPINT1/HSF1/TP63/MMP14/CCND1/HS6ST1/LDOC1/AKT1/GJB3/KRT8/BAX/IRX5/SOCS3/GJB5/ST14/ALOX15B/SMARCC1/SFRP1/CITED2/MEN1/BAK1/ROR2/HTRA1/ICAM1/MAPK3/CDKN1C/BOK/NUPR1/BMP7/LGR4/DHCR24/RARA/RXRA/SERPINF1/VEGFA/ARID1A/NOS3/TYRO3/ARRB2/MEA1/PLCD1/FSTL3/SOX15/WNT7B/HYAL3/NR2F2/DMRTA1/FGF8/ETV2/BCL2L2/VDR/OSR1/PATZ1/PLC…
GO:0022411	GO:0022411	cellular component disassembly	469	0.348618	1.56878	0.00175747	0.0150942	0.00886863	3071	tags=28%, list=15%, signal=24%	SPTBN2/TPSAB1/TP53/BSG/MRPL4/MARK2/FSCN1/WDR1/TSPO/ADAM15/TGFB1/MAP1S/CHCHD10/CAPG/MAP1LC3A/KATNB1/ATP13A2/HMGA1/MRPS2/EIF5A/HSF1/FZD1/CAPNS1/MRPL2/MMP14/C1QC/GBF1/CTDNEP1/CDC37/SH3GL1/TSC2/SREBF2/BAX/ACIN1/USP36/H1F0/CX3CL1/SMARCC1/PPP1CA/CHMP1A/MRPL37/TMEM173/C1QA/UPF1/SREBF1/HTRA1/DVL3/SMARCA4/SMARCC2/MRPS34/CLN3/FLOT1/BMP1/BOK/CFL1/C1QB/ERAL1/MICAL1/FURIN/MID1IP1/PLK3/DVL1/STX5/FIS1/PHF23/MFN…
GO:0050808	GO:0050808	synapse organization	376	0.349516	1.54774	0.00172117	0.0150942	0.00886863	4009	tags=27%, list=19%, signal=22%	ERBB2/SPTBN2/PFN1/SEMA3F/PTPRF/ABHD17A/EIF4G1/LAMB2/CHCHD10/ANAPC2/IGSF9/BAIAP2/DMPK/FZD1/C1QC/PLXNB1/ACTN1/APOE/CLSTN1/EPHB3/ITGA3/AGRN/NECTIN1/TUBB/CX3CL1/WASF2/C1QA/ABL1/PCDHGC3/NFATC4/CFL1/C1QB/DVL1/LRFN3/MAPT/DCTN1/NDRG1/PIN1/GRIPAP1/LRRC4/WNT7B/PLXND1/CLSTN3/PALM/CDC20/NRXN2/LRTM2/SNCG/PLXNB2/PTPRS/DAG1/OXT/MECP2/ARHGAP39/ARC/RHOA/NGEF/LRRC4B/CAMK1/CHD4/NTRK1/LRFN4/ADGRB1/ADGRB2/SHISA7/SHAN…
GO:0031098	GO:0031098	stress-activated protein kinase signaling cascade	253	0.3502	1.49012	0.00185185	0.0150942	0.00886863	3523	tags=33%, list=17%, signal=28%	HRAS/MAP2K2/VANGL2/ZFP36L1/MINK1/CDC42EP5/SH2D3C/EZR/PKN1/GSTP1/AKT1/GPS1/CRYAB/MAP3K6/DUSP1/MAPK8IP3/SFRP1/PYCARD/MEN1/ROR2/TAOK2/GPS2/ZFP36/DVL3/MAPK3/MAPKAPK2/STK25/SIRPA/RAPGEF1/MAP4K2/LGALS9/SH2D3A/TRPV4/VEGFA/CCL21/SPHK1/MAPK13/TRIB1/TRAF4/TNFRSF19/WNT7B/PTK2B/GADD45B/MAPK11/AGER/TRAF2/PINK1/SH3RF2/FLT4/RHOA/PRMT1/SFRP2/TAB1/LTBR/TAB3/GADD45G/TLR9/RELL2/FOXM1/HAND2/PHLPP1/DUSP3/CCL19/MAPK8I…
GO:0045785	GO:0045785	positive regulation of cell adhesion	370	0.350632	1.54653	0.00175747	0.0150942	0.00886863	3200	tags=26%, list=15%, signal=22%	ERBB2/IGFBP2/CD74/FLNA/JUP/ADGRG1/TGFB1/FLOT2/PTPN23/MDK/TFE3/CD81/RHOD/AKT1/RELA/EFNB1/ZBTB7B/THY1/RAC3/ITGA3/AP3D1/CALR/CX3CL1/CD276/PRKD2/SFRP1/MYADM/NINJ1/PYCARD/CITED2/ABL1/TNFRSF18/ICAM1/IL4R/LDB1/FLOT1/PTPN6/BAD/BMP7/SMAD3/LGALS9/ZBTB16/CORO1A/CD44/DMTN/TMEM102/IL1RL2/SDC4/RARA/ILK/VEGFA/CCL21/PTPRU/ZFHX3/ZMIZ1/RAC1/FSTL3/PTK2B/SOCS1/CCDC80/AGER/ZAP70/UNC13D/SMAD7/AFDN/FOXP3/SOX2/DAG1/ITGB…
GO:0051403	GO:0051403	stress-activated MAPK cascade	247	0.352819	1.49474	0.00189753	0.0150942	0.00886863	3523	tags=33%, list=17%, signal=28%	HRAS/MAP2K2/VANGL2/ZFP36L1/MINK1/CDC42EP5/SH2D3C/EZR/PKN1/GSTP1/AKT1/GPS1/CRYAB/MAP3K6/DUSP1/MAPK8IP3/SFRP1/PYCARD/MEN1/ROR2/TAOK2/GPS2/ZFP36/DVL3/MAPK3/MAPKAPK2/STK25/SIRPA/RAPGEF1/MAP4K2/LGALS9/SH2D3A/TRPV4/VEGFA/CCL21/SPHK1/MAPK13/TRIB1/TRAF4/TNFRSF19/WNT7B/PTK2B/GADD45B/MAPK11/AGER/TRAF2/PINK1/SH3RF2/FLT4/PRMT1/SFRP2/TAB1/LTBR/TAB3/GADD45G/TLR9/RELL2/FOXM1/HAND2/PHLPP1/DUSP3/CCL19/MAPK8IP2/EM…
GO:0051402	GO:0051402	neuron apoptotic process	221	0.352851	1.47262	0.0019084	0.0150942	0.00886863	3418	tags=29%, list=16%, signal=24%	TFAP2A/HRAS/TP53/UBE2M/AKT1S1/BCL2L1/G6PD/TP63/MDK/GRN/BAX/ATN1/CX3CL1/SIGMAR1/NGFR/NONO/MAX/GPX1/NFATC4/CLN3/AKT2/BOK/NUPR1/FIS1/CORO1A/LRP1/UNC5B/ILK/TYRO3/DNAJC5/ARRB2/PIN1/CDC34/PTK2B/CRLF1/FGF8/PINK1/HMOX1/NLRP1/MECP2/HSP90AB1/RHOA/NTRK1/AMBRA1/HYOU1/TFAP2B/GAPDH/NSMF/GRIN1/SIX1/NES/FOXQ1/JUN/EGLN2/DIO3/FOXB1/TNFRSF21/PITX3/RAPSN/ERBB3/CNTFR/MAP3K11/BTG2
GO:0048568	GO:0048568	embryonic organ development	397	0.353145	1.57307	0.00172117	0.0150942	0.00886863	4624	tags=33%, list=22%, signal=26%	TFAP2A/SOX18/TRIM28/TP53/EPAS1/VANGL2/ZFP36L1/CEBPA/ABR/SLC6A8/TGFB1/RARG/JUNB/NDRG4/MDFI/ENG/SPINT1/HSF1/MFAP2/MMP14/HS6ST1/BCR/AKT1/SIX2/KRT8/IRX5/EPHA2/FLT3LG/MED12/SOCS3/GJB5/ST14/TBX1/CITED2/PPP1R13L/ROR2/TBX2/MAPK3/MBD3/CDKN1C/BMP7/SMAD3/DVL1/RARA/EPN1/VEGFA/ARID1A/MEGF8/PLCD1/WNT7B/NAGLU/NOTCH1/SMO/NR2F2/PTK7/FGF8/TEAD2/OSR1/PLCD3/POLE/COBL/ASCL2/DLX5/TFEB/ZFPM1/PCGF2/SLC9A3R1/KRT19/TBX3/T…
GO:0009201	GO:0009201	ribonucleoside triphosphate biosynthetic process	136	0.353525	1.40196	0.0149254	0.0497762	0.0292462	3236	tags=24%, list=16%, signal=21%	NUP62/TP53/TGFB1/PKM/VPS9D1/OGDH/ALDOA/POM121C/TPI1/ZBTB7A/GPI/NME4/UCKL1/PFKL/EIF6/AAAS/NUPR1/STAT3/NME3/PID1/PINK1/GALK1/ALDOC/UCK1/ENO2/PGAM2/JMJD8/POM121/SPHK2/GAPDH/SIRT6/COX2/TAZ
GO:1905475	GO:1905475	regulation of protein localization to membrane	172	0.353673	1.4401	0.00938086	0.0383232	0.0225169	4197	tags=33%, list=20%, signal=26%	YWHAE/ERBB2/HRAS/TP53/BCL2L1/TGFB1/EZR/TP63/MMP14/RHOG/CD81/AKT1/TP73/ITGA3/EPHA2/MYO1C/TFDP1/AKT2/AP2M1/BAD/FIS1/LRP1/DMTN/ARHGEF16/GRIPAP1/CHP1/PID1/IQSEC2/GDI1/YWHAB/RAMP3/DAG1/ITGB2/PRKCZ/LYPD1/NMT1/SHISA7/YWHAZ/CSK/CLIP3/PPP3CC/PPP1R13B/CACNB3/MIEF2/DLG1/STAC3/INPP5K/NKD2/TFDP2/E2F1/SSH1/GPC4/GHSR/CIB1/GPER1/STX4
GO:0001501	GO:0001501	skeletal system development	454	0.354092	1.58901	0.00176367	0.0150942	0.00886863	3244	tags=25%, list=16%, signal=21%	TFAP2A/COMP/COL1A1/PITX1/FGFR3/CARM1/TP53/ZNF385A/ALPL/ECM1/TGFB1/RARG/SERPINH1/MDFI/RYR1/ATP6AP1/ENG/POR/TP63/MMP14/PLXNB1/MDK/NAB2/RELA/ZNF219/SIX2/WNT5B/IRX5/EPHA2/COL27A1/MED12/WASF2/TBX1/SOX4/SFRP1/TCOF1/TMEM119/ROR2/MAPK3/CDKN1C/JAG2/ADAMTS7/BMP1/GNA11/LRP5/PTPN6/ESRRA/WDR5/BMP7/DEAF1/SMAD3/ZBTB16/CD44/HES5/RARA/TRPV4/SPNS2/SULF2/DCHS1/MEGF8/NPPC/WNT7B/PRELP/ANKRD11/HYAL3/TEAD4/HYAL2/TIMP1/…
GO:1990778	GO:1990778	protein localization to cell periphery	269	0.354308	1.52127	0.00180505	0.0150942	0.00886863	4362	tags=34%, list=21%, signal=27%	PKP3/HRAS/FLNA/BSG/VAMP2/BCL2L1/JUP/TGFB1/FLOT2/EZR/RAMP2/MMP14/RHOG/CPLX1/CD81/AKT1/EHD2/CLSTN1/TSPAN14/ITGA3/EPHA2/NUMA1/MYADM/TNFRSF1A/PACS1/LAMA5/GGA3/AP4M1/AKT2/FLOT1/AP2M1/ARFRP1/LRP1/GAK/CDH1/TTC7A/ARHGEF16/DCHS1/GRIPAP1/PID1/PIP5K1A/GGA1/KRT18/PALM/PLK1/IQSEC2/SMURF1/TSPAN5/GORASP1/AFDN/RAMP3/DAG1/PRKCZ/LYPD1/SAPCD2/F11R/SLC9A3R1/GAS6/NSG1/MAL/SPTBN4/GRIN1/CSK/IKBKB/CLIP3/TESC/CACNB3/TMEM…
GO:0090130	GO:0090130	tissue migration	277	0.355086	1.53065	0.00176991	0.0150942	0.00886863	3188	tags=28%, list=15%, signal=24%	SOX18/PFN1/KRT2/JUP/TGFB1/PXN/KRT16/RAB25/HSPB1/ZNF580/PTPN23/PKN1/APOE/GRN/FAT2/AKT1/GIPC1/GPI/ITGA3/EPHA2/CALR/PRKD2/EVL/LTB4R2/CORO1B/ABL1/ID1/KLF4/GPX1/MYH9/PLEKHG5/CSNK2B/AAMP/SERPINF1/VEGFA/SH3BP1/NOS3/EPPK1/PTK2B/NOTCH1/PLXND1/GLUL/BCAR1/HDAC5/NR2F2/ADIPOR1/PKN3/BCAS3/SP1/FGF8/ADGRA2/HMOX1/ACVRL1/FLT4/ITGB2/MECP2/RHOA/LOXL2/ALOX12/PPARG/APOA1/ADGRB1/ATOH8/EPHB4/NR4A1/FGFBP1/SRF/EMC10/ACTA1…
GO:0090132	GO:0090132	epithelium migration	272	0.355247	1.52557	0.00181159	0.0150942	0.00886863	3188	tags=28%, list=15%, signal=24%	SOX18/PFN1/KRT2/JUP/TGFB1/PXN/KRT16/RAB25/HSPB1/ZNF580/PTPN23/PKN1/APOE/GRN/FAT2/AKT1/GIPC1/GPI/ITGA3/EPHA2/CALR/PRKD2/EVL/LTB4R2/CORO1B/ABL1/ID1/KLF4/GPX1/MYH9/PLEKHG5/CSNK2B/AAMP/SERPINF1/VEGFA/SH3BP1/NOS3/EPPK1/PTK2B/NOTCH1/PLXND1/GLUL/BCAR1/HDAC5/NR2F2/ADIPOR1/PKN3/BCAS3/SP1/FGF8/ADGRA2/HMOX1/ACVRL1/FLT4/ITGB2/MECP2/RHOA/LOXL2/ALOX12/PPARG/APOA1/ADGRB1/ATOH8/EPHB4/NR4A1/FGFBP1/SRF/EMC10/HDAC6…
GO:2001233	GO:2001233	regulation of apoptotic signaling pathway	360	0.355783	1.5716	0.00171527	0.0150942	0.00886863	3205	tags=29%, list=15%, signal=25%	YWHAE/CD74/GRINA/MAZ/TP53/ZNF385A/BCL2L1/P4HB/LMNA/HSPB1/PPP2R1A/CHCHD10/GNAI2/IFI6/TP63/GSTP1/AKT1/RELA/TP73/PRKCD/PML/BAX/TNFRSF12A/TRAF7/CX3CL1/SFRP1/PPP1CA/PYCARD/NONO/BAK1/NDUFA13/RAD9A/PSME3/ICAM1/CIDEB/TFDP1/GPX1/RBCK1/NFATC4/BOK/BAD/MIF/MUC1/NUPR1/SIAH2/TIMP3/SMAD3/SERPINE1/FIS1/PEA15/LGALS9/CD44/UNC5B/TMEM102/NOS3/HIP1R/ARRB2/FAF1/PELI3/CREB3L1/CDKN2D/MAPK7/PRR7/ZNF205/HYAL2/PIAS4/TRAF2/…
GO:0010631	GO:0010631	epithelial cell migration	269	0.355795	1.52765	0.00180505	0.0150942	0.00886863	3188	tags=28%, list=15%, signal=24%	SOX18/PFN1/KRT2/JUP/TGFB1/PXN/KRT16/RAB25/HSPB1/ZNF580/PTPN23/PKN1/APOE/GRN/FAT2/AKT1/GIPC1/GPI/ITGA3/EPHA2/CALR/PRKD2/EVL/LTB4R2/CORO1B/ABL1/ID1/KLF4/GPX1/MYH9/PLEKHG5/CSNK2B/AAMP/SERPINF1/VEGFA/SH3BP1/NOS3/EPPK1/PTK2B/NOTCH1/PLXND1/GLUL/BCAR1/HDAC5/NR2F2/ADIPOR1/PKN3/BCAS3/SP1/ADGRA2/HMOX1/ACVRL1/FLT4/ITGB2/MECP2/RHOA/LOXL2/ALOX12/PPARG/APOA1/ADGRB1/ATOH8/EPHB4/NR4A1/FGFBP1/SRF/EMC10/HDAC6/CLEC…
GO:0001558	GO:0001558	regulation of cell growth	366	0.356332	1.56881	0.00176367	0.0150942	0.00886863	3277	tags=26%, list=16%, signal=22%	ERBB2/IGFBP4/TP53/LTBP4/EIF4G1/ADAM15/TGFB1/IGFBP5/PPP2R1A/ANAPC2/PPP1R9B/G6PD/MMP14/BAP1/OSGIN1/APOE/AKT1/CDA/CRABP2/CLSTN1/PML/CRYAB/SIPA1/BRAT1/KLHL22/ARHGEF11/TNFRSF12A/PLXNA3/SFRP1/RPS6KA1/TAOK2/ABL1/NDUFA13/LAMTOR1/SMARCA4/DNAJB2/EXOSC4/CDKN1A/SMAD3/LRP1/EXTL3/ARHGAP4/FHL1/MAPT/ILK/VEGFA/SPHK1/PIN1/MEGF8/CDKN2D/FBLN5/PTK2B/CLSTN3/RTN4R/BCAR1/HYAL2/ADIPOR1/GDI1/DNPH1/SMURF1/OGFR/HAMP/PTPRS/R…
GO:0016055	GO:0016055	Wnt signaling pathway	471	0.357364	1.60979	0.00175439	0.0150942	0.00886863	3419	tags=29%, list=16%, signal=25%	IGFBP4/IGFBP2/COL1A1/PFN1/KREMEN1/VANGL2/MARK2/JUP/TGFB1I1/RARG/PPP2R1A/MDFI/NDRG2/MOV10/FZD1/ATP6V0C/TRPM4/CCND1/PSMD3/MDK/IGFBP6/APOE/CTDNEP1/AP2S1/AP2A1/WNT5B/CSNK1D/ITGA3/TCF7L1/APCDD1/BCL7B/MED12/BCL9L/SOX4/SFRP1/PPP1CA/TSKU/ROR2/ABL1/PSME3/DVL3/SMARCA4/CDH3/KLF4/NFATC4/LDB1/AP2M1/RAPGEF1/LRP5/TLE2/CELSR2/BARX1/SIAH2/TLE3/AP2A2/SMAD3/CSNK2B/DVL1/LGR4/LRP1/PORCN/CSNK1G2/CALCOCO1/BAMBI/ILK/PTP…
GO:1905330	GO:1905330	regulation of morphogenesis of an epithelium	176	0.358168	1.46523	0.00558659	0.029065	0.0170772	3069	tags=27%, list=15%, signal=23%	PFN1/VANGL2/TGFB1/FZD1/PSMD3/MDK/AP2S1/SIX2/AP2A1/MED12/SFRP1/ROR2/TBX2/ABL1/PSME3/DVL3/AP2M1/CELSR2/BMP7/AP2A2/DVL1/LGR4/RXRA/VEGFA/ARHGEF19/ARRB2/PSMB6/RAC1/SMO/PTK7/SMURF1/PSMB10/WNT4/RHOA/SFRP2/SAPCD2/ALOX12/PSMD8/PSMC3/LHX1/GRHL3/PARD6A/FZD2/SIX1/PSMC4/PSMB8/SIRT6
GO:0198738	GO:0198738	cell-cell signaling by wnt	473	0.360085	1.62037	0.00176367	0.0150942	0.00886863	3419	tags=29%, list=16%, signal=25%	IGFBP4/IGFBP2/COL1A1/PFN1/KREMEN1/VANGL2/MARK2/JUP/TGFB1I1/RARG/PPP2R1A/MDFI/NDRG2/MOV10/PTPN23/FZD1/ATP6V0C/TRPM4/CCND1/PSMD3/MDK/IGFBP6/APOE/CTDNEP1/AP2S1/AP2A1/WNT5B/CSNK1D/ITGA3/TCF7L1/APCDD1/BCL7B/MED12/BCL9L/SOX4/SFRP1/PPP1CA/TSKU/ROR2/ABL1/PSME3/DVL3/SMARCA4/CDH3/KLF4/NFATC4/LDB1/AP2M1/RAPGEF1/LRP5/TLE2/CELSR2/BARX1/SIAH2/TLE3/AP2A2/SMAD3/CSNK2B/DVL1/LGR4/LRP1/PORCN/CSNK1G2/CALCOCO1/BAMBI/…
GO:0007265	GO:0007265	Ras protein signal transduction	312	0.360195	1.57091	0.00176056	0.0150942	0.00886863	4062	tags=34%, list=19%, signal=28%	EPS8L2/ARHGDIA/HRAS/NUP62/TRIM28/TP53/VANGL2/ABR/ADGRG1/RTKN/EPS8L1/RHOG/APOE/RALGDS/GBF1/BCR/SHC1/ITGA3/ARHGAP35/ARHGEF11/MYO9B/WASF2/NGFR/ABL1/KCTD13/FLOT1/RRAS/CFL1/RAPGEF1/PLEKHG5/PLEKHG6/FGD1/CDKN1A/MFN2/ARHGAP1/ARHGAP4/DHCR24/RGL2/ARHGEF19/ARHGEF16/PLEKHG2/RAC1/CNKSR1/NOTCH1/MAPK11/RTN4R/IQSEC2/GDI1/ADRA2A/CYTH1/RASSF1/TIMP2/CYTH2/RASAL1/OBSCN/RASIP1/RHOA/NGEF/SHC2/RAPGEF3/NTRK1/VAV2/APOA1/…
GO:0001525	GO:0001525	angiogenesis	453	0.36032	1.61688	0.00176678	0.0150942	0.00886863	3142	tags=27%, list=15%, signal=23%	ERBB2/SOX18/HSPG2/EMILIN1/TYMP/APOD/KRT1/EPAS1/ECM1/JUP/ADAM15/ADGRG1/COL18A1/PKM/HSPB1/NOTCH3/EFNA3/ENG/RAMP2/MMP14/MDK/HS6ST1/GRN/AKT1/EGFL7/COL4A2/PML/SHC1/EPHB3/THY1/EPHA2/B4GALT1/TNFRSF12A/CX3CL1/WASF2/TBX1/PRKD2/SFRP1/SHB/NGFR/TIE1/HGS/LAMA5/ABL1/ID1/CD34/KLF4/GPX1/NFATC4/MYH9/RRAS/SERPINE1/STAT3/UNC5B/EPN1/AAMP/SERPINF1/VEGFA/ANGPTL4/SPHK1/NOS3/TNFAIP2/STIM1/COL8A2/CREB3L1/PLCD1/MAPK7/PTK2…
GO:0000302	GO:0000302	response to reactive oxygen species	212	0.360326	1.49871	0.0037594	0.0224527	0.0131922	3756	tags=36%, list=18%, signal=30%	COL1A1/FOSL1/APOD/KDM6B/PXN/MAP1LC3A/ZNF580/STAT6/HSF1/LCN2/GSTP1/APOE/AKT1/RELA/PRKCD/CRYAB/DUSP1/UCP2/SIGMAR1/BAK1/ABL1/FOS/MAPK3/KLF4/GPX1/STK25/SIRPA/PRDX5/BAD/PLK3/BMP7/MAPT/SPHK1/NOS3/MAPK13/MAPK7/FBLN5/PTK2B/HYAL2/SZT2/PDK2/TRAF2/PINK1/HMOX1/PPIF/MPV17/AQP1/ENDOG/DHFR/PCGF2/SESN2/TPM1/PDGFRB/EEF2/ADPRHL2/CCL19/CDK2/PPP2CB/CST3/HDAC6/RIPK3/HYAL1/JUN/RHOB/SRC/PPP5C/SDC1/TXNRD2/CBX8/STK24/NCF…
GO:0051056	GO:0051056	regulation of small GTPase mediated signal transduction	304	0.360619	1.5673	0.00178891	0.0150942	0.00886863	4053	tags=33%, list=19%, signal=27%	EPS8L2/ARHGDIA/HRAS/NUP62/ABR/ADGRG1/TRIP10/RHOV/EPS8L1/RHOG/APOE/GBF1/RHOD/BCR/PIK3R2/SHC1/TSC2/RAC3/ITGA3/SIPA1/ARHGAP35/ARHGEF11/MYO9B/ABL1/KCTD13/FLOT1/RAPGEF1/PLEKHG5/PLEKHG6/FGD1/ARHGAP23/MFN2/ARHGAP1/ARHGAP4/RGL2/RHOC/SH3BP1/ARHGEF19/ARHGEF16/PLEKHG2/ARHGAP30/RAC1/NOTCH1/RTN4R/IQSEC2/GDI1/CYTH1/TIMP2/CYTH2/RASAL1/OBSCN/RASIP1/ARHGAP39/RHOA/NGEF/ARAP1/NTRK1/VAV2/RHOT2/APOA1/FGD5/AUTS2/ARHGA…
GO:0061564	GO:0061564	axon development	420	0.36082	1.60922	0.00176367	0.0150942	0.00886863	4009	tags=30%, list=19%, signal=25%	ERBB2/ARHGDIA/SPTBN2/SEMA3F/PTPRF/KREMEN1/APOD/VANGL2/MARK2/TSPO/LAMB2/VASP/ANAPC2/GPC1/BAIAP2/TUBB3/EZR/APOE/GRN/GRB7/CRABP2/SHC1/EPHB3/THY1/S100A6/ARHGAP35/TNFRSF12A/PLXNA3/NECTIN1/DOK4/MAPK8IP3/EVL/NGFR/TSKU/PDLIM7/TAOK2/ABL1/PTPRA/MAPK3/KLF4/STK25/FLOT1/BMP7/DVL1/LRP1/UNC5B/ARHGAP4/MAPT/ILK/VEGFA/MEGF8/MAPK7/RTN4RL1/CSF1R/RTN4R/SZT2/GDI1/NRTN/FGF8/METRN/TRAK1/PTPRS/ARTN/COBL/PITPNA/DAG1/HSP90…
GO:0016197	GO:0016197	endosomal transport	168	0.361427	1.47229	0.00564972	0.029065	0.0170772	2410	tags=27%, list=12%, signal=24%	MVB12A/RAB11B/RNF126/NDRG4/PTPN23/TBC1D10B/VPS37B/GBF1/VPS51/CCDC22/TOM1/TBC1D17/EHD2/YKT6/VPS28/HGS/GGA3/EHD1/AP5B1/LAMTOR1/TBC1D10A/ARFRP1/BET1L/STX5/SNX8/ARHGAP1/DCTN1/CHMP6/LMTK2/SNF8/GRIPAP1/GGA1/EHD4/VPS39/MICALL1/VPS26B/SGSM2/AP1S1/SNX17/RAB7B/CHMP4B/TBC1D10C/VPS25/STX10/TBC1D14/UBE2O
GO:0043010	GO:0043010	camera-type eye development	288	0.361525	1.56293	0.00179533	0.0150942	0.00886863	4346	tags=31%, list=21%, signal=25%	TFAP2A/FKBP8/LAMB2/TGFB1/RARG/FZR1/ZNF513/WNT5B/THY1/BAX/CRYAB/IRX5/EPHA2/ARHGAP35/TCIRG1/NECTIN1/NINJ1/PPP1R13L/TSKU/BAK1/TBX2/MAX/SMARCA4/CDKN1C/KLF4/LRP5/BMP7/SMAD3/MFN2/HES5/RARA/RXRA/SERPINF1/VEGFA/ARID1A/COL8A2/WNT7B/IMPDH2/PYGO2/RAB11FIP4/SMARCD3/NF2/ACVRL1/C12orf57/CDK4/PDGFRB/FOXC1/LHX1/SKI/GRHL3/AQP5/TFAP2B/SRF/RAX/NES/SLC25A25/CLCN2/SDK2/JUN/RING1/RDH13/DIO3/FJX1/FOXC2/ACHE/PITX3/DLG1/…
GO:0031345	GO:0031345	negative regulation of cell projection organization	150	0.361594	1.45149	0.0094697	0.0383232	0.0225169	2225	tags=21%, list=11%, signal=19%	ARHGDIA/CARM1/KREMEN1/APOE/PLXNB3/PRKCD/THY1/ITGA3/PLXNA3/CDK10/MAP4/EVL/NGFR/ID1/NFATC4/EVI5L/LRP1/ARHGAP4/GAK/STMN2/TRPV4/CCL21/RTN4RL1/RTN4R/GDI1/DPYSL3/PTPRS/GORASP1/ADCY6/FKBP4/RHOA/NGEF
GO:0032535	GO:0032535	regulation of cellular component size	298	0.36182	1.57056	0.00178891	0.0150942	0.00886863	3156	tags=28%, list=15%, signal=24%	SPTBN2/PFN1/AKT1S1/WDR1/CDC42EP5/RARG/PPP1R15A/VASP/CAPG/ANAPC2/ATP13A2/EZR/CSF3/APOE/AKT1/PRKCD/ARPC4/CRABP2/LRRC8E/ARHGAP35/TNFRSF12A/PLXNA3/MYO1C/EVL/PPP1CA/MYADM/PYCARD/CORO1B/ABL1/ELN/ICAM1/WDTC1/AP2M1/CFL1/LAMTOR4/CORO1A/LRP1/ARHGAP4/DMTN/MAPT/ILK/FCHSD1/TRPV4/VEGFA/CCL21/SNF8/SH3BP1/HIP1R/MEGF8/PLEKHG2/RAC1/WNT7B/PTK2B/RTN4R/GDI1/LRRC8A/PTPRS/AQP1/BAIAP2L1/HSP90AB1/RHOA/KCNN4/ADD1/BIN1/VAV…
GO:0001503	GO:0001503	ossification	356	0.363238	1.60107	0.00172712	0.0150942	0.00886863	2660	tags=24%, list=13%, signal=21%	JUND/TFAP2A/COL6A1/COMP/COL1A1/FGFR3/SBNO2/KREMEN1/CEBPA/ALPL/ECM1/TGFB1/IGFBP5/JUNB/TPM4/ALYREF/RYR1/ATP6AP1/FZD1/TRPM4/TP63/MMP14/PLXNB1/MDK/NAB2/FASN/AKT1/SIX2/FBXL15/EPHA2/TCIRG1/SFRP1/TP53INP2/TMEM119/MEN1/PDLIM7/ROR2/ID1/MAPK3/BMP1/LRP5/ESRRA/BMP7/SMAD3/LGR4/ZBTB16/PRKACA/RRBP1/ILK/MRC2/DCHS1/NPPC/CREB3L1/TOB2/FSTL3/MYBBP1A/WNT7B/IL6R/PTK2B/NOTCH1/MN1/CTNNBIP1/SMO/SMURF1/FAM20C/OSR1/CEBPD/P…
GO:0060491	GO:0060491	regulation of cell projection assembly	156	0.363335	1.46702	0.00564972	0.029065	0.0170772	3149	tags=26%, list=15%, signal=22%	EPS8L2/HRAS/CDC42EP1/PFN1/FSCN1/CDC42EP5/EPS8L1/RHOG/PLXNB3/PRKCD/AGRN/EPHA2/ARHGAP35/CDK10/CDC42EP4/WASF2/MAP4/EVL/ICAM1/MARK4/EVI5L/DMTN/CCL21/RAC1/PALM/BCAS3/DPYSL3/CNTROB/COBL/ARAP1/AUTS2/CARMIL2/TWF2/FUZ/CCL19/RABEP2/SRF/WASL/ESPN/SRC
GO:2000027	GO:2000027	regulation of animal organ morphogenesis	244	0.364154	1.53961	0.00189394	0.0150942	0.00886863	3417	tags=28%, list=16%, signal=24%	TFAP2A/PFN1/CARM1/VANGL2/TGFB1/ENG/FZD1/POR/PSMD3/MDK/AP2S1/SIX2/AP2A1/BAX/MED12/TBX1/SFRP1/CITED2/ROR2/TBX2/ABL1/PSME3/DVL3/CD34/AP2M1/CELSR2/BMP7/AP2A2/DVL1/LGR4/RXRA/VEGFA/SULF2/ARHGEF19/ARRB2/WNT10A/PSMB6/RAC1/NOTCH1/SMO/PTK7/SMURF1/FGF8/VDR/LIMS2/PSMB10/WNT4/RHOA/SFRP2/SAPCD2/PSMD8/PSMC3/FOXC1/HAND2/LHX1/GRHL3/PARD6A/FZD2/SIX1/PSMC4/PSMB8/DIO3/FOXC2/MYC/BMP2/DVL2/PSMB5/NFIB
GO:0001101	GO:0001101	response to acid chemical	313	0.364643	1.58979	0.00175131	0.0150942	0.00886863	3941	tags=33%, list=19%, signal=27%	COL6A1/IGFBP2/COL1A1/AQP3/BCL2L1/LDLR/RARG/COL18A1/BAIAP2/HSF1/GSTP1/AKT1/RELA/GJB3/WNT5B/KRT8/SIPA1/KLHL22/DUSP1/CD9/TBX1/UCP2/SFRP1/TIE1/TRIM16/NDUFA13/SREBF1/ICAM1/LAMTOR1/SLC10A3/KLF4/NFATC4/CFL1/LAMTOR4/BAD/PEMT/FIS1/IGF2R/RARA/RXRA/SERPINF1/VEGFA/CCL21/ASS1/CDKN2D/PID1/WNT7B/PTK2B/SOCS1/PTK7/PINK1/TEAD2/OSR1/HAMP/FFAR2/ADCY6/AQP1/IGFBP7/OXT/RHOA/SMARCD1/GSS/NTRK1/PPARG/DHFR/RRAGA/SESN2/TYMS…
GO:0007178	GO:0007178	transmembrane receptor protein serine/threonine kinase signaling pathway	293	0.364691	1.57782	0.00178891	0.0150942	0.00886863	3254	tags=28%, list=16%, signal=24%	COMP/ZYX/EMILIN1/TP53/FKBP8/LTBP4/TGFB1I1/TGFB1/PXN/NBL1/ENG/FZD1/GIPC1/ZBTB7A/PML/FAM89B/FBXL15/ITGA3/FAM83G/BCL9L/NUMA1/SFRP1/CITED2/MEN1/ROR2/ABL1/HTRA1/ID1/FOS/MAPK3/CDKN1C/FURIN/BMP7/SMAD3/CSNK2B/HES5/CLDN5/BAMBI/STUB1/ILK/ARRB2/VASN/PIN1/MEGF8/DACT2/ZNF703/FSTL3/NOTCH1/LRRC32/SMURF1/FGF8/ETV2/SMAD7/ACVRL1/RGMB/HSP90AB1/PRKCZ/RHOA/ADAMTSL2/DLX5/SFRP2/STK11/TAB1/F11R/UBE2O/MSX2/GDF15/EGR1/ATO…
GO:0001667	GO:0001667	ameboidal-type cell migration	355	0.364722	1.60777	0.00172712	0.0150942	0.00886863	3188	tags=28%, list=15%, signal=25%	SOX18/PFN1/SEMA3F/KRT2/JUP/TGFB1/PXN/KRT16/RAB25/HSPB1/ZNF580/PTPN23/PKN1/APOE/GRN/FAT2/AKT1/GIPC1/EFNB1/GPI/PML/ITGA3/EPHA2/CALR/WASF2/TBX1/PRKD2/EVL/LTB4R2/CORO1B/LAMA5/ABL1/ID1/KLF4/GPX1/MYH9/CFL1/PLEKHG5/BMP7/CSNK2B/ARHGAP4/DMTN/SDC4/ILK/AAMP/SERPINF1/VEGFA/SH3BP1/NOS3/MEGF8/EPPK1/PIP5K1A/PTK2B/NOTCH1/TNS1/PLXND1/GLUL/BCAR1/HYAL2/SMO/HDAC5/NR2F2/ADIPOR1/MTA2/PKN3/TIMP1/NRTN/BCAS3/SP1/FGF8/ADG…
GO:0045765	GO:0045765	regulation of angiogenesis	268	0.365249	1.56767	0.00181818	0.0150942	0.00886863	3624	tags=30%, list=17%, signal=25%	ERBB2/HSPG2/EMILIN1/KRT1/ECM1/JUP/PKM/HSPB1/EFNA3/ENG/RAMP2/MDK/GRN/COL4A2/PML/EPHA2/TNFRSF12A/CX3CL1/PRKD2/SFRP1/NGFR/TIE1/HGS/ABL1/ID1/CD34/KLF4/RRAS/SERPINE1/STAT3/EPN1/SERPINF1/VEGFA/ANGPTL4/SPHK1/NOS3/STIM1/CREB3L1/MAPK7/PTK2B/NOTCH1/PLXND1/GLUL/GTF2I/HDAC5/SP1/ADGRA2/HMOX1/ACVRL1/AQP1/ITGB2/MECP2/RHOA/SFRP2/RAPGEF3/JMJD8/PPARG/PAK4/ITGA5/ADGRB1/FOXC1/ADGRB2/AGO2/RNH1/STAB1/FGFBP1/EMC10/HLA-…
GO:0071559	GO:0071559	response to transforming growth factor beta	218	0.366628	1.52878	0.00189036	0.0150942	0.00886863	2400	tags=23%, list=12%, signal=21%	ZFP36L2/COL1A1/ZYX/EMILIN1/TP53/ZFP36L1/LTBP4/TGFB1I1/TGFB1/PXN/ENG/GIPC1/ZBTB7A/COL4A2/PML/FAM89B/ITGA3/BCL9L/SFRP1/CITED2/MEN1/HTRA1/ID1/FOS/CDKN1C/FURIN/SMAD3/CLDN5/BAMBI/STUB1/ZFHX3/ARRB2/VASN/WNT10A/PIN1/MAPK7/ZNF703/HYAL2/LRRC32/SMURF1/SMAD7/ACVRL1/WNT4/HSP90AB1/PRKCZ/RHOA/ADAMTSL2/STK11/TAB1/F11R/FNDC4
GO:0005996	GO:0005996	monosaccharide metabolic process	256	0.366951	1.56417	0.00183824	0.0150942	0.00886863	3268	tags=27%, list=16%, signal=23%	IGFBP4/TP53/SLC25A1/APOD/FUT6/PKM/IGFBP5/TKT/CYB5R3/G6PD/ALDOA/GAA/TPI1/SLC35A2/AKT1/GPI/BRAT1/SLC25A11/C1QTNF2/B4GALT1/PPP1CA/DCXR/C1QTNF1/CRTC2/PFKL/AKT2/WDTC1/PMM1/LRP5/BAD/SLC25A10/MIDN/WDR5/FAM3A/SORD/DGKQ/H6PD/PC/ADIPOR1/G6PC3/SIK1/PDK2/GALK1/PGP/ALDOC/ATF3/ENO2/GALT/PGAM2/INPPL1/IGFBP3/TKFC/POMC/SESN2/NISCH/PHLDA2/DGAT2/KAT2A/TFAP2B/GAPDH/MAPK14/PGM5/USF1/SRC/EP300/CLK2/GLYCTK/GSK3A
GO:0007050	GO:0007050	cell cycle arrest	224	0.368808	1.54406	0.00188324	0.0150942	0.00886863	3189	tags=29%, list=15%, signal=25%	HRAS/GAS1/CARM1/TNKS1BP1/TP53/ZNF385A/IRF6/GAS2L1/TGFB1/PPP1R15A/PPP1R9B/CCND1/MLST8/TP73/PML/BAX/CALR/DUSP1/WDR6/PPM1G/SOX4/E4F1/CNOT3/ABL1/LAMTOR1/CDKN1C/ZBTB17/TFDP1/AKT2/LAMTOR4/MIF/MUC1/CDKN1A/PLK3/SMAD3/PRKACA/DHCR24/ILK/ZFHX3/CDKN2D/MYBBP1A/NOTCH1/RASSF1/SOX2/PPP2R3B/HSP90AB1/PRMT1/PIDD1/STK11/BIN1/PCBP4/RRAGA/GAS6/CDK4/FOXM1/CDK2/CDK9/E2F4/SGSM3/MED25/CGREF1/LAMTOR2/RPTOR/EP300/PPP2R5B/MYC
GO:0071560	GO:0071560	cellular response to transforming growth factor beta stimulus	212	0.369144	1.53539	0.0018797	0.0150942	0.00886863	2390	tags=23%, list=11%, signal=21%	ZFP36L2/COL1A1/ZYX/EMILIN1/TP53/ZFP36L1/LTBP4/TGFB1I1/TGFB1/PXN/ENG/GIPC1/ZBTB7A/COL4A2/PML/FAM89B/ITGA3/BCL9L/SFRP1/CITED2/MEN1/HTRA1/ID1/FOS/CDKN1C/FURIN/SMAD3/CLDN5/BAMBI/STUB1/ARRB2/VASN/WNT10A/PIN1/MAPK7/ZNF703/HYAL2/LRRC32/SMURF1/SMAD7/ACVRL1/WNT4/HSP90AB1/PRKCZ/RHOA/ADAMTSL2/STK11/TAB1/F11R
GO:0120032	GO:0120032	regulation of plasma membrane bounded cell projection assembly	154	0.369574	1.49178	0.00566038	0.029065	0.0170772	3045	tags=25%, list=15%, signal=22%	EPS8L2/HRAS/CDC42EP1/PFN1/FSCN1/CDC42EP5/EPS8L1/RHOG/PLXNB3/PRKCD/AGRN/EPHA2/ARHGAP35/CDK10/CDC42EP4/WASF2/MAP4/EVL/ICAM1/MARK4/EVI5L/DMTN/CCL21/RAC1/PALM/BCAS3/DPYSL3/CNTROB/COBL/ARAP1/AUTS2/CARMIL2/TWF2/FUZ/CCL19/RABEP2/SRF/WASL/ESPN
GO:0044706	GO:0044706	multi-multicellular organism process	215	0.370256	1.54506	0.00186567	0.0150942	0.00886863	4378	tags=33%, list=21%, signal=26%	IGFBP2/FOSL1/TRIM28/KLK14/BSG/FOSB/TGFB1/IGFBP5/JUNB/FBLN1/HSF1/RAMP2/LDOC1/AKT1/ITGA3/CALR/B4GALT1/UCP2/MEN1/TEAD3/FOS/MAPK3/LGALS9/RARA/EPN1/RXRA/ARID1A/HYAL3/COMT/NR2F2/HSD11B2/TIMP1/TRO/VDR/IGFBP7/FKBP4/WNT4/OXT/KPNA6/ITGA5/TFCP2L1/UBE2Q1/AGO2/BYSL/SPHK2/CST3/TLE6/CAD/CORIN/COL16A1/ENDOU/ADRA2C/DHODH/PAPPA/CLDN4/RPL29/SH3PXD2B/MAPK1/DKKL1/THBD/KLF1/ACVR1B/GHSR/SYDE1/EPOR/PPARD/BMPR2/UCN/GIP/T…
GO:0033157	GO:0033157	regulation of intracellular protein transport	210	0.370316	1.54022	0.00189394	0.0150942	0.00886863	2364	tags=24%, list=11%, signal=21%	YWHAE/ERBB2/HRAS/FLNA/NUCB1/NUP62/TRIM28/TP53/APOD/VAMP2/JUP/TGFB1/RANGAP1/ATP13A2/BAP1/CD81/PRKCD/PIK3R2/SREBF2/SUPT6H/USP36/MYO1C/B3GAT3/SREBF1/TM9SF4/AKT2/PLK3/SMAD3/FIS1/PRKACA/DMTN/CDH1/GRIPAP1/CHP1/UBE2J2/PTPN14/HYAL2/SMO/GDI1/OAZ2/BCAS3/PINK1/DMAP1/ITGB2/CEP131/MAVS/BCAP31/CAMK1/AKAP8L/RAPGEF3
GO:0072089	GO:0072089	stem cell proliferation	106	0.372831	1.431	0.0150376	0.0497762	0.0292462	3069	tags=26%, list=15%, signal=23%	SOX18/TP53/ZFP36L1/TGFB1/FBLN1/DAGLB/SIX2/KCTD11/CX3CL1/TEAD3/CD34/ACE/NDE1/VEGFA/KDF1/WNT7B/SMO/SMARCD3/NF2/PLXNB2/ARTN/SFRP2/OVOL1/TBX3/ZNF335/ARHGEF2/NES/SIRT6
GO:0071229	GO:0071229	cellular response to acid chemical	187	0.373106	1.53867	0.00376648	0.0224527	0.0131922	3941	tags=32%, list=19%, signal=26%	COL6A1/COL1A1/BCL2L1/LDLR/BAIAP2/HSF1/AKT1/GJB3/WNT5B/SIPA1/KLHL22/TBX1/SFRP1/NDUFA13/SREBF1/LAMTOR1/KLF4/NFATC4/LAMTOR4/RARA/SERPINF1/VEGFA/ASS1/PID1/WNT7B/PTK2B/SOCS1/PTK7/PINK1/TEAD2/OSR1/HAMP/FFAR2/ADCY6/AQP1/SMARCD1/PPARG/RRAGA/SESN2/EGR1/CDK4/DGAT2/TWF2/HTRA2/PTK6/NSMF/SIX1/LAMTOR2/TESC/RPTOR/SRC/COL16A1/CYP26B1/WNT9A/E2F1/TNC/NTRK2/WNT6/CEBPB/GNB1
GO:0051258	GO:0051258	protein polymerization	215	0.373229	1.55747	0.00186567	0.0150942	0.00886863	3716	tags=33%, list=18%, signal=27%	SPTBN2/PFN1/CAMSAP3/UBE2S/CDC42EP5/VASP/CAPG/CSF3/PRKCD/ARPC4/CSNK1D/MYO1C/NUMA1/EVL/MYADM/PYCARD/CORO1B/ABL1/ELN/ICAM1/TUBGCP6/MID1IP1/CORO1A/DMTN/GPX4/MAPT/DCTN1/FCHSD1/STMN2/TRPV4/CCL21/GOLGA2/FES/DIAPH1/HIP1R/PLEKHG2/RAC1/PTK2B/TUBGCP2/TUBGCP3/PINK1/COBL/BAIAP2L1/FKBP4/MECP2/RHOA/ADD1/BIN1/ARPC1B/ARL2/CARMIL2/TWF2/SCIN/SPTBN4/LMOD1/WASL/GBA2/CLIP3/CORO7/TPPP/ARPIN/EML2/MICALL2/CCL24/DLG1/HCK/…
GO:1903034	GO:1903034	regulation of response to wounding	156	0.375008	1.51415	0.00564972	0.029065	0.0170772	4340	tags=34%, list=21%, signal=27%	HRAS/PTPRF/KREMEN1/KRT1/DUOX1/MDK/APOE/GRN/PRKCD/TNFRSF12A/CD9/C1QTNF1/CAPN3/CD34/KLF4/MYH9/CDKN1A/SMAD3/SERPINE1/LRP1/DMTN/NOS3/EPPK1/RTN4RL1/SOX15/RTN4R/AGER/SERPING1/ADRA2A/PLAU/PTPRS/WNT4/DUOX2/PLAUR/ALOX12/SYTL4/CADM4/VKORC1/USF1/FOXC2/RAB3A/STK24/F12/THBD/WFDC1/ANXA1/RGMA/PDGFB/PPARD/REG3G/HBEGF/FOXA2/TGFBR2
GO:0045165	GO:0045165	cell fate commitment	224	0.375039	1.57015	0.00188324	0.0150942	0.00886863	4714	tags=33%, list=23%, signal=26%	PITX1/SOX18/GAS1/TP53/FKBP8/EPAS1/TGFB1I1/KDM6B/NOTCH3/FOXN1/STAT6/SIX2/ZBTB7B/PML/TBX1/SFRP1/ROR2/TBX2/TEAD3/JAG2/KLF4/EYA2/STAT3/HES5/RARA/SMO/NR2F2/FGF8/ETS2/ETV2/FOXP3/SOX2/NOTCH4/PAF1/RHOA/SOX12/SFRP2/PPARG/ZFPM1/TBX3/ARHGEF2/EVX1/SIX1/GLI2/FOXC2/BMP2/GSX2/NEUROG1/NKX2-1/LBX1/CYP26B1/DMRTA2/SOX8/SUFU/SH3PXD2B/TBX6/BMP4/CEBPB/PTCH1/TCF3/SOX1/HES1/GLI3/NKX2-5/DLL1/FOXA2/PSEN1/LATS1/IRF4/TENM4/…
GO:0002685	GO:0002685	regulation of leukocyte migration	174	0.375679	1.53385	0.00376648	0.0224527	0.0131922	3044	tags=28%, list=15%, signal=24%	CD74/EMILIN1/APOD/ABR/PLVAP/ECM1/TGFB1/NBL1/ZNF580/MMP14/MDK/CD81/BCR/AKT1/THY1/CALR/DUSP1/CD9/PYCARD/TNFRSF18/ICAM1/MAPK3/MMP28/MIF/SERPINE1/LGALS9/TMEM102/TRPV4/VEGFA/CCL21/CXCL14/RAC1/IL6R/PTK2B/SLC8B1/AGER/C10orf99/HMOX1/RHOA/GPSM3/GAS6/IL27RA/JAM3/CCL19/MAPK14/CXCL17/ITGA2B/WASL/RIPK3
GO:0017038	GO:0017038	protein import	132	0.375956	1.48829	0.00746269	0.0337918	0.0198545	2172	tags=25%, list=10%, signal=23%	FLNA/NUP62/TRIM28/TP53/APOD/JUP/TGFB1/LMNA/APOE/AKT1/PRKCD/PIK3R2/SIX2/PML/TSC2/PEX6/PEX10/NDUFA13/TOMM22/PPP1R10/PEX16/CDKN1A/SMAD3/STAT3/CDH1/PEX5/CHP1/HYAL2/SMO/IPO13/IPO4/DMAP1/MAVS
GO:0072655	GO:0072655	establishment of protein localization to mitochondrion	115	0.37649	1.46068	0.0131332	0.0466207	0.0273922	3807	tags=34%, list=18%, signal=28%	YWHAE/TP53/TSPO/TP63/BAP1/AKT1/TP73/SREBF2/BAX/USP36/NDUFA13/SREBF1/TFDP1/TOMM22/BAD/FIS1/MFN2/MAPT/TOMM40/UBE2J2/SLC25A6/PINK1/YWHAB/NMT1/TIMM44/PAM16/HTRA2/YWHAZ/AIP/PMPCA/PPP3CC/PPP1R13B/GSK3A/MICALL2/HK1/TIMM22/SAE1/TFDP2/E2F1
GO:0046165	GO:0046165	alcohol biosynthetic process	133	0.376727	1.48836	0.0075188	0.0337918	0.0198545	3203	tags=28%, list=15%, signal=24%	LSS/TM7SF2/CYB5R3/G6PD/POR/APOE/FASN/SCAP/SREBF2/NFYC/MVD/ITPKC/SREBF1/SCD/ACLY/IMPA2/DHCR24/MVK/SPHK1/PMVK/DGKQ/PTK2B/ISYNA1/SP1/IP6K1/VDR/PGP/PTH1R/WNT4/ERLIN2/DHCR7/DHFR/SQLE/SPHK2/CLCN2/SPR/BMP2
GO:0097191	GO:0097191	extrinsic apoptotic signaling pathway	201	0.37775	1.56644	0.00189036	0.0150942	0.00886863	2906	tags=28%, list=14%, signal=25%	FGFR3/BCL2L1/TGFB1/LMNA/PPP2R1A/MKNK2/IFI6/LCN2/GSTP1/AKT1/RELA/PML/KRT8/BAX/TNFRSF12A/CX3CL1/SFRP1/PPP1CA/PYCARD/TNFRSF1A/NDUFA13/PSME3/ICAM1/GPX1/RBCK1/BAD/EYA2/SIAH2/TIMP3/SMAD3/SERPINE1/PEA15/UNC5B/NOS3/SIVA1/FAF1/PELI3/MAPK7/IL6R/KRT18/HYAL2/TRAF2/HMOX1/ATF3/DEDD2/PAK2/PIDD1/SFRP2/LTBR/GABARAP/ITPRIP/TNFRSF1B/MAL/HTRA2/ARHGEF2/NOL3/TNFRSF10A
GO:0007565	GO:0007565	female pregnancy	186	0.379297	1.5616	0.00379507	0.0224527	0.0131922	4378	tags=35%, list=21%, signal=28%	IGFBP2/FOSL1/TRIM28/BSG/FOSB/TGFB1/IGFBP5/JUNB/FBLN1/HSF1/RAMP2/LDOC1/AKT1/ITGA3/CALR/UCP2/MEN1/TEAD3/FOS/MAPK3/LGALS9/RARA/EPN1/RXRA/ARID1A/COMT/NR2F2/HSD11B2/TIMP1/TRO/VDR/IGFBP7/FKBP4/WNT4/OXT/KPNA6/ITGA5/TFCP2L1/UBE2Q1/AGO2/BYSL/SPHK2/CST3/TLE6/CAD/CORIN/COL16A1/ENDOU/ADRA2C/DHODH/PAPPA/CLDN4/RPL29/MAPK1/THBD/KLF1/ACVR1B/GHSR/SYDE1/EPOR/PPARD/BMPR2/UCN/GIP/TGFBR2/CRHR1
GO:0030278	GO:0030278	regulation of ossification	178	0.379993	1.55684	0.00376648	0.0224527	0.0131922	2159	tags=22%, list=10%, signal=20%	JUND/TFAP2A/COMP/KREMEN1/CEBPA/ECM1/TGFB1/IGFBP5/ATP6AP1/TRPM4/TP63/MDK/SIX2/TCIRG1/SFRP1/TMEM119/MEN1/PDLIM7/ID1/MAPK3/LRP5/ESRRA/BMP7/SMAD3/ZBTB16/PRKACA/ILK/NPPC/TOB2/WNT7B/IL6R/PTK2B/NOTCH1/CTNNBIP1/SMURF1/FAM20C/OSR1/CEBPD/WNT4/OXT
GO:0007015	GO:0007015	actin filament organization	304	0.380082	1.65189	0.00178891	0.0150942	0.00886863	4034	tags=35%, list=19%, signal=29%	SPTBN2/ZYX/FLNA/PFN1/SORBS3/ACTN4/FSCN1/WDR1/CDC42EP5/PXN/VASP/CAPG/BAIAP2/EZR/CSF3/ALDOA/ACTN1/RHOD/PRKCD/ARPC4/ARHGAP35/MYO1C/CX3CL1/WASF2/EVL/SFRP1/MYADM/PYCARD/CORO1B/ABL1/ELN/ICAM1/ID1/KCTD13/CFL1/MICAL1/SMAD3/ASAP3/CORO1A/DMTN/SDC4/FCHSD1/RHOC/TRPV4/CCL21/SH3BP1/DIAPH1/HIP1R/FHOD1/PLEKHG2/RAC1/PTK2B/BCAR1/DPYSL3/NF2/COBL/BAIAP2L1/WNT4/RHOA/ADD1/ARAP1/INPPL1/RAPGEF3/BIN1/APOA1/ARPC1B/TPM1/CA…
GO:0007162	GO:0007162	negative regulation of cell adhesion	241	0.382072	1.61338	0.00188679	0.0150942	0.00886863	2464	tags=24%, list=12%, signal=21%	ERBB2/ARHGDIA/CD74/COL1A1/IL1RN/APOD/ACTN4/MAD1L1/CDSN/ADAM15/TGFB1/FBLN1/FXYD5/MMP14/PLXNB1/MDK/PLXNB3/AKT1/PRKCD/ZBTB7B/CLDN7/SIPA1/DUSP1/CX3CL1/CD9/MYADM/MEN1/C1QTNF1/ABL1/IL4R/KLF4/PTPN6/MUC1/SERPINE1/LGALS9/LRP1/DMTN/SDC4/TRPV4/CCL21/CDH1/ASS1/DACT2/MAPK7/ZNF703/SOCS1/NOTCH1/LRRC32/BCAS3/NF2/SMAD7/ACVRL1/FOXP3/RHOA/NFKBID/ALOX12/SFTPD/APOA1
GO:0002064	GO:0002064	epithelial cell development	194	0.382591	1.58868	0.00184843	0.0150942	0.00886863	3348	tags=28%, list=16%, signal=24%	SOX18/FOSL2/FLNA/KRT2/CDSN/LAMB2/RARG/COL18A1/RAB25/ENG/EZR/TP63/TMEM79/ADAMTSL4/FASN/WNT5B/EPHA2/B4GALT1/ST14/MYADM/TNFRSF1A/ICAM1/ID1/GPX1/RAPGEF1/BAD/CDKN1A/CLDN5/RARA/KDF1/DACT2/WNT7B/SMO/FLNB/PTPRS/AFDN/NOTCH4/PLOD3/ADD1/RAPGEF3/NTRK1/F11R/TFCP2L1/SLC9A3R1/TYMS/CST3/E2F4/IKBKB/HRH2/FOXC2/GSK3A/SDC1/PALLD/DNASE1L2/HAPLN2
GO:0007568	GO:0007568	aging	298	0.384378	1.66848	0.00178891	0.0150942	0.00886863	3121	tags=31%, list=15%, signal=26%	JUND/COMP/IGFBP2/HRAS/CARM1/NUP62/TP53/APOD/TSPO/TGFB1/TPRA1/KRT16/LMNA/IGFBP5/ALDH3A1/NFKB2/ENG/HMGA1/TP63/FZR1/AKT1/RELA/PRKCD/SCAP/COL4A2/PML/CRYAB/CALR/CX3CL1/UCP2/BAK1/TBX2/C1QA/ABL1/YPEL3/SREBF1/ICAM1/FOS/MAPK3/MBD3/CDKN1C/MIF/CDKN1A/SERPINE1/AMFR/STAT3/LRP1/GPX4/ILK/SERPINF1/ASS1/ZMIZ1/PRELP/HYAL2/AGER/SERPING1/H2AFX/TIMP1/INPP5D/POLG/TIMP2/HAMP/NUDT1/ENDOG/PTH1R/DAG1/ITGB2/LOXL2/ALOX12/GS…
GO:0032970	GO:0032970	regulation of actin filament-based process	318	0.38551	1.68266	0.00176056	0.0150942	0.00886863	3716	tags=31%, list=18%, signal=26%	ARHGDIA/SPTBN2/HRAS/FLNA/PFN1/SORBS3/VANGL2/FSCN1/WDR1/JUP/TGFB1/CDC42EP5/PXN/VASP/CAPG/BAIAP2/TRPM4/CSF3/MDK/RHOD/MLST8/PRKCD/ARPC4/ARHGAP35/CDK10/MYO1C/CX3CL1/WASF2/EVL/SFRP1/MYADM/PYCARD/CORO1B/TAOK2/ABL1/ELN/ICAM1/ID1/MYH9/CFL1/SMAD3/ASAP3/CORO1A/LRP1/DMTN/SDC4/ILK/CNN2/FCHSD1/RHOC/CCL21/SH3BP1/FES/ARHGEF19/HIP1R/FHOD1/PLEKHG2/RAC1/PTK2B/CSF1R/BCAS3/NF2/TNNC1/BAIAP2L1/WNT4/RHOA/BST2/ADD1/ARAP…
GO:0019318	GO:0019318	hexose metabolic process	228	0.386301	1.62326	0.0018797	0.0150942	0.00886863	3268	tags=29%, list=16%, signal=25%	IGFBP4/TP53/SLC25A1/APOD/FUT6/PKM/IGFBP5/G6PD/ALDOA/GAA/TPI1/SLC35A2/AKT1/GPI/BRAT1/SLC25A11/C1QTNF2/B4GALT1/PPP1CA/DCXR/C1QTNF1/CRTC2/PFKL/AKT2/WDTC1/PMM1/LRP5/BAD/SLC25A10/MIDN/WDR5/FAM3A/SORD/DGKQ/H6PD/PC/ADIPOR1/G6PC3/SIK1/PDK2/GALK1/PGP/ALDOC/ATF3/ENO2/GALT/PGAM2/INPPL1/IGFBP3/TKFC/POMC/SESN2/NISCH/PHLDA2/DGAT2/KAT2A/TFAP2B/GAPDH/MAPK14/PGM5/USF1/SRC/EP300/CLK2/GLYCTK/GSK3A
GO:0007164	GO:0007164	establishment of tissue polarity	119	0.386498	1.50099	0.00759013	0.0337918	0.0198545	3036	tags=30%, list=15%, signal=26%	PFN1/VANGL2/WDR1/FZD1/TP63/PSMD3/AP2S1/AP2A1/MED12/SFRP1/ROR2/ABL1/PSME3/DVL3/AP2M1/CELSR2/AP2A2/DVL1/ARHGEF19/ARRB2/PSMB6/RAC1/PTK7/SMURF1/PSMB10/RHOA/SFRP2/SAPCD2/PSMD8/PSMC3/FUZ/GRHL3/PARD6A/FZD2/PSMC4/PSMB8
GO:0045926	GO:0045926	negative regulation of growth	225	0.386856	1.62078	0.00189394	0.0150942	0.00886863	4503	tags=35%, list=22%, signal=27%	FGFR3/TP53/ADAM15/TGFB1/IGFBP5/PPP2R1A/PPP1R9B/G6PD/OSGIN1/TP73/CDA/PML/CRYAB/SIPA1/MT1X/PLXNA3/ALOX15B/SFRP1/NDUFA13/SMARCA4/DNAJB2/CDKN1A/SMAD3/ARHGAP4/FHL1/CDKN2D/NOTCH1/MT2A/MAPK11/RTN4R/HYAL2/ADIPOR1/PTPRS/ACVRL1/SMARCA2/CTDP1/BST2/SLIT3/SFRP2/STK11/ING1/PPARG/GDF15/SESN2/MT1F/SPHK2/PTK6/SERTAD3/HYAL1/SEMA3G/SOCS2/MEG3/MT1H/TMPRSS4/GSK3A/TNK1/NPR1/NDRG3/BCL6/WFDC1/NTN1/MT1G/BMP4/NPPB/PTCH1/A…
GO:0051495	GO:0051495	positive regulation of cytoskeleton organization	193	0.387625	1.60602	0.0018622	0.0150942	0.00886863	3533	tags=33%, list=17%, signal=28%	HRAS/FLNA/PFN1/NUP62/SORBS3/CDC42EP5/PXN/VASP/KATNB1/CSF3/ARPC4/PLXNA3/MYO1C/CX3CL1/NUMA1/EVL/SFRP1/PYCARD/CORO1B/ABL1/ICAM1/ID1/CFL1/SMAD3/CORO1A/SDC4/MAPT/DCTN1/FCHSD1/RHOC/STMN2/TRPV4/CCL21/FES/HIP1R/FHOD1/RAC1/PTK2B/BCAS3/NF2/BAIAP2L1/NSFL1C/WNT4/MECP2/RHOA/RAPGEF3/BIN1/APOA1/ARPC1B/ARL2/TPM1/CARMIL2/SCIN/LMOD1/WASL/NES/ARPIN/NTF3/DYNC1H1/CCL24/DLG1/HCK/LIMK1/TESK1
GO:0048732	GO:0048732	gland development	405	0.387912	1.72614	0.00174216	0.0150942	0.00886863	3254	tags=27%, list=16%, signal=23%	PITX1/LSR/IRF6/CEBPA/MAD1L1/TSPO/TGFB1/RARG/PKM/CRIP1/IGFBP5/ORAI1/FOXN1/STAT6/APRT/TP63/MPST/CCND1/MDK/FASN/AKT1/RELA/ZBTB7B/PML/EPHB3/BAX/EPHA2/DBP/ARHGAP35/ALOX15B/SMARCC1/TBX1/UCP2/SFRP1/RPS6KA1/CITED2/LAMA5/TBX2/ABL1/MAPK3/CDKN1C/KRT76/GPX1/AKT2/BMP7/DEAF1/SMAD3/CSNK2B/IGF2R/RARA/RXRA/SERPINF1/VEGFA/CDH1/ASS1/SULF2/WNT10A/ZNF703/FSTL3/WNT7B/CSF1R/PLXND1/SMO/PYGO2/CAPN1/RHBDD3/NCOR2/FGF8/HMOX…
GO:0110053	GO:0110053	regulation of actin filament organization	210	0.388274	1.61491	0.00189394	0.0150942	0.00886863	3774	tags=35%, list=18%, signal=29%	SPTBN2/FLNA/PFN1/SORBS3/WDR1/CDC42EP5/PXN/VASP/CAPG/CSF3/PRKCD/ARPC4/ARHGAP35/MYO1C/CX3CL1/WASF2/EVL/SFRP1/MYADM/PYCARD/CORO1B/ABL1/ELN/ICAM1/ID1/CFL1/SMAD3/ASAP3/CORO1A/DMTN/SDC4/FCHSD1/RHOC/CCL21/SH3BP1/HIP1R/FHOD1/PLEKHG2/RAC1/PTK2B/NF2/BAIAP2L1/WNT4/RHOA/ADD1/ARAP1/RAPGEF3/BIN1/APOA1/ARPC1B/TPM1/CARMIL2/TWF2/SCIN/SPTBN4/LMOD1/SHANK3/WASL/GBA2/SHANK1/ARPIN/CCL24/DLG1/HCK/FHOD3/LIMK1/TESK1/INPP…
GO:0045667	GO:0045667	regulation of osteoblast differentiation	110	0.38954	1.49632	0.00965251	0.0383232	0.0225169	2764	tags=27%, list=13%, signal=24%	JUND/CEBPA/IGFBP5/ATP6AP1/TRPM4/TP63/TCIRG1/SFRP1/TMEM119/MEN1/PDLIM7/ID1/LRP5/ESRRA/BMP7/SMAD3/PRKACA/ILK/NPPC/WNT7B/IL6R/NOTCH1/CTNNBIP1/FAM20C/CEBPD/WNT4/SFRP2/MSX2/HAND2/SKI
GO:1901568	GO:1901568	fatty acid derivative metabolic process	137	0.390961	1.54907	0.0075188	0.0337918	0.0198545	3445	tags=31%, list=17%, signal=26%	CD74/SLC25A1/CYP4F22/PTGDS/ALOX12B/DAGLB/FASN/DGAT1/GGT5/ALOX15B/FAAH/PTGES2/GGTLC1/GGT6/TNFRSF1A/TECR/LTC4S/SCD/ACLY/EPHX2/MAPK3/MAPKAPK2/CES2/GPX1/MIF/GPX4/ACOT7/MGLL/ABHD16A/ALOX12/ABCD1/HACD1/GCDH/DGAT2/PTGR1/ALOX5/CBR1/CYP4F8/EDN2/GGT7/ATP6V1B1/ALOXE3
GO:0060348	GO:0060348	bone development	181	0.391054	1.60179	0.00193424	0.0150942	0.00886863	3244	tags=28%, list=16%, signal=24%	TFAP2A/COMP/COL1A1/FGFR3/CARM1/TP53/ZNF385A/ALPL/TGFB1/RARG/SERPINH1/RYR1/ATP6AP1/ENG/POR/MMP14/PLXNB1/NAB2/COL27A1/WASF2/TMEM119/LRP5/PTPN6/RARA/TRPV4/SPNS2/SULF2/DCHS1/MEGF8/NPPC/ANKRD11/FGF8/FAM20C/THBS3/RHOA/DLX5/SFRP2/INPPL1/MSX2/SLC38A10/ZFPM1/MEF2D/FOXC1/SKI/SRF/GLG1/VKORC1/EP300/BMP2/NEUROG1
GO:0060562	GO:0060562	epithelial tube morphogenesis	304	0.391961	1.70351	0.00178891	0.0150942	0.00886863	4371	tags=38%, list=21%, signal=30%	SOX18/PFN1/VANGL2/TGFB1/RARG/VASP/NDRG4/ENG/SPINT1/FZD1/MMP14/MDK/SIX2/PML/TSC2/EPHA2/MED12/ARHGAP35/ST14/PRKD2/SOX4/SFRP1/PPP1CA/LAMA5/TBX2/ABL1/NFATC4/CFL1/BMP7/DEAF1/SMAD3/CSNK2B/LGR4/PRKACA/HES5/SDC4/RARA/ILK/VEGFA/ARID1A/DCHS1/MEGF8/IRX3/NOTCH1/CSF1R/PLXND1/CTNNBIP1/SMO/PTK7/FGF8/VDR/TEAD2/OSR1/PLXNB2/ACVRL1/COBL/DAG1/RASIP1/WNT4/NOTCH4/RHOA/SFRP2/ALOX12/MTSS1/MSX2/TBX3/HAND2/LHX1/WNK4/FUZ/S…
GO:0046578	GO:0046578	regulation of Ras protein signal transduction	208	0.394701	1.6414	0.00188679	0.0150942	0.00886863	4053	tags=34%, list=19%, signal=28%	EPS8L2/ARHGDIA/HRAS/NUP62/ABR/ADGRG1/EPS8L1/APOE/GBF1/BCR/SHC1/ITGA3/ARHGAP35/ARHGEF11/MYO9B/ABL1/KCTD13/FLOT1/RAPGEF1/PLEKHG5/PLEKHG6/FGD1/MFN2/RGL2/ARHGEF19/ARHGEF16/PLEKHG2/RAC1/NOTCH1/RTN4R/IQSEC2/CYTH1/TIMP2/CYTH2/RASAL1/OBSCN/RASIP1/NGEF/NTRK1/VAV2/APOA1/FGD5/AUTS2/PDGFRB/FOXM1/FGD3/TNFAIP1/ARHGEF2/PPP2CB/CYTH4/CYTH3/SGSM3/CADM4/PLEKHG4B/LZTR1/PLEKHG3/SOS2/ARHGEF25/TNK1/PSD4/ITPKB/TIAM1/BCL…
GO:0007613	GO:0007613	memory	109	0.394799	1.52054	0.0093985	0.0383232	0.0225169	3118	tags=28%, list=15%, signal=24%	LDLR/RGS14/MDK/APOE/ITGA3/ABCA7/NFATC4/MAPT/SERPINF1/CIC/RIN1/COMT/ITPR3/FOXO6/OXT/MECP2/B4GALT2/PRKCZ/ARC/ITGA5/EIF4EBP2/KMT2B/SHISA7/KAT2A/CCK/SHANK3/SRF/GRIN1/HRH2/SHANK1
GO:0032388	GO:0032388	positive regulation of intracellular transport	194	0.396101	1.64478	0.00184843	0.0150942	0.00886863	3311	tags=30%, list=16%, signal=25%	YWHAE/ERBB2/HRAS/FLNA/TRIM28/TP53/VAMP2/JUP/TGFB1/PTPN23/EZR/BAP1/CD81/PRKCD/PIK3R2/EHD2/SREBF2/USP36/MYO1C/NUMA1/B3GAT3/EHD1/TM9SF4/IL4R/CDH3/AKT2/PLK3/SMAD3/FIS1/PRKACA/CDH1/CHP1/UBE2J2/HYAL2/SMO/OAZ2/BCAS3/PINK1/DMAP1/ITGB2/CEP131/MAVS/CAPN10/BCAP31/CAMK1/RAPGEF3/GAS6/PCNT/HTRA2/SPHK2/EMD/MAPK14/ADORA2B/CACNB3/GSK3A/MICALL2/DYNC1H1/MIEF2
GO:1902903	GO:1902903	regulation of supramolecular fiber organization	284	0.396178	1.7096	0.00179211	0.0150942	0.00886863	3778	tags=36%, list=18%, signal=30%	SPTBN2/FLNA/PFN1/EMILIN1/SORBS3/CAMSAP3/WDR1/LDLR/CDC42EP5/PXN/VASP/CAPG/KATNB1/AEBP1/CSF3/APOE/PRKCD/ARPC4/CRYAB/ARHGAP35/MYO1C/CX3CL1/NUMA1/WASF2/EVL/SFRP1/MYADM/PYCARD/CORO1B/ABL1/ELN/ICAM1/ID1/GPX1/CFL1/MID1IP1/SMAD3/ASAP3/CORO1A/DMTN/SDC4/MAPT/DCTN1/FCHSD1/RHOC/STMN2/TRPV4/COLGALT1/CCL21/SH3BP1/FES/HIP1R/FHOD1/PLEKHG2/RAC1/PTK2B/NF2/BAIAP2L1/FKBP4/WNT4/MECP2/RHOA/ADD1/ARAP1/RAPGEF3/BIN1/APOA…
GO:0050905	GO:0050905	neuromuscular process	100	0.396284	1.50965	0.0114504	0.0429643	0.0252438	1618	tags=17%, list=8%, signal=16%	COMP/ABR/GAA/BCR/SLURP1/RAC3/GM2A/TPP1/ABL1/CLN3/DVL1/DCTN1/OPA3/PRRT2/NPAS1/CHD8/FOXS1
GO:0070372	GO:0070372	regulation of ERK1 and ERK2 cascade	238	0.398458	1.67766	0.00189394	0.0150942	0.00886863	2832	tags=25%, list=14%, signal=22%	ERBB2/CD74/HRAS/FGFR3/EMILIN1/TGFB1/NDRG4/RGS14/GNAI2/NDRG2/FBLN1/ATP6AP1/EZR/GSTP1/APOE/SHC1/EPHA2/DUSP1/TRAF7/CX3CL1/ABCA7/PRKD2/PYCARD/ABL1/ICAM1/MAPK3/KLF4/RRAS/SIRPA/RAPGEF1/PTPN6/MIF/TIMP3/LGALS9/CD44/LRP1/PSCA/TRPV4/CCL21/ARRB2/PIN1/PTK2B/NOTCH1/CSF1R/AGER/FGF8/RAMP3/FLT4/PRKCZ/ATF3/NTRK1/SLC9A3R1/GAS6/PDGFRB/HAND2/DUSP3/CCL19/CD4/MARCO
GO:0048705	GO:0048705	skeletal system morphogenesis	196	0.399722	1.6569	0.0018797	0.0150942	0.00886863	3732	tags=30%, list=18%, signal=25%	TFAP2A/COMP/COL1A1/FGFR3/CARM1/ALPL/TGFB1/RARG/SERPINH1/MDFI/POR/MMP14/NAB2/SIX2/IRX5/COL27A1/MED12/TBX1/SFRP1/TMEM119/ROR2/BMP1/LRP5/BMP7/SMAD3/RARA/TRPV4/MEGF8/NPPC/ANKRD11/HYAL2/OSR1/THBS3/DLX5/SFRP2/INPPL1/MSX2/MEF2D/PCGF2/FOXC1/LHX1/FUZ/SKI/HOXA6/GLG1/MAPK14/SIX1/HOXD9/HYAL1/FOXC2/NEUROG1/DLG1/CYP26B1/DHRS3/CSRNP1/SH3PXD2B/WNT9A/THRA
GO:0042063	GO:0042063	gliogenesis	268	0.399932	1.71653	0.00181818	0.0150942	0.00886863	4745	tags=40%, list=23%, signal=31%	ERBB2/WDR1/TSPO/LAMB2/LDLR/ADGRG1/TGFB1/GPC1/SPINT1/MMP14/GSTP1/MDK/NAB2/GRN/AKT1/RELA/TP73/MED12/CX3CL1/CD9/SOX4/ROR2/C1QA/ABL1/MAPK3/BACE2/POU3F1/AKT2/BOK/STAT3/LRP1/HES5/MAPT/ILK/NDRG1/PTK2B/NOTCH1/CSF1R/SMO/AGER/MXRA8/METRN/NF2/SOX2/DAG1/LGI4/CSPG4/ASCL2/RHOA/CDK5R2/PHGDH/TMEM98/IDH2/BIN1/PPARG/TNFRSF1B/PRPF19/MBOAT7/EEF2/MYRF/SKI/HDAC10/IL34/CSK/TNFRSF21/BMP2/CLU/GSX2/DAAM2/RNF10/PITX3/GPR15…
GO:0006006	GO:0006006	glucose metabolic process	194	0.400138	1.66154	0.00184843	0.0150942	0.00886863	3169	tags=29%, list=15%, signal=25%	IGFBP4/TP53/SLC25A1/APOD/PKM/IGFBP5/G6PD/ALDOA/GAA/TPI1/AKT1/GPI/BRAT1/SLC25A11/C1QTNF2/PPP1CA/DCXR/C1QTNF1/CRTC2/PFKL/AKT2/WDTC1/LRP5/BAD/SLC25A10/MIDN/WDR5/FAM3A/SORD/DGKQ/H6PD/PC/ADIPOR1/G6PC3/SIK1/PDK2/PGP/ALDOC/ATF3/ENO2/PGAM2/INPPL1/IGFBP3/POMC/SESN2/NISCH/PHLDA2/DGAT2/KAT2A/TFAP2B/GAPDH/MAPK14/PGM5/USF1/SRC/EP300/CLK2
GO:0046683	GO:0046683	response to organophosphorus	125	0.404488	1.58875	0.00743494	0.0337918	0.0198545	2847	tags=23%, list=14%, signal=20%	COL1A1/FOSL1/CARM1/BSG/FOSB/ZFP36L1/IGFBP5/ALDH3A1/DUOX1/EZR/TRPM4/RELA/P2RY2/DUSP1/TRIM16/SREBF1/FOS/RAPGEF1/DMTN/ASS1/DGKQ/PTK2B/AQP1/OXT/DUOX2/RAPGEF3/TYMS/HCN2/CIB2
GO:0032956	GO:0032956	regulation of actin cytoskeleton organization	277	0.405412	1.74759	0.00176991	0.0150942	0.00886863	3716	tags=34%, list=18%, signal=29%	ARHGDIA/SPTBN2/HRAS/FLNA/PFN1/SORBS3/VANGL2/FSCN1/WDR1/TGFB1/CDC42EP5/PXN/VASP/CAPG/BAIAP2/CSF3/MDK/RHOD/MLST8/PRKCD/ARPC4/ARHGAP35/CDK10/MYO1C/CX3CL1/WASF2/EVL/SFRP1/MYADM/PYCARD/CORO1B/TAOK2/ABL1/ELN/ICAM1/ID1/CFL1/SMAD3/ASAP3/CORO1A/LRP1/DMTN/SDC4/ILK/FCHSD1/RHOC/CCL21/SH3BP1/FES/ARHGEF19/HIP1R/FHOD1/PLEKHG2/RAC1/PTK2B/CSF1R/BCAS3/NF2/BAIAP2L1/WNT4/RHOA/BST2/ADD1/ARAP1/RAPGEF3/BIN1/F11R/APOA1/…
GO:0070371	GO:0070371	ERK1 and ERK2 cascade	255	0.405442	1.72559	0.00185529	0.0150942	0.00886863	2832	tags=24%, list=14%, signal=21%	ZFP36L2/ERBB2/CD74/HRAS/FGFR3/EMILIN1/MAP2K2/ZFP36L1/TGFB1/NDRG4/RGS14/GNAI2/NDRG2/FBLN1/ATP6AP1/EZR/GSTP1/APOE/SHC1/EPHA2/DUSP1/TRAF7/CX3CL1/ABCA7/PRKD2/PYCARD/ABL1/ICAM1/MAPK3/KLF4/RRAS/SIRPA/RAPGEF1/PTPN6/MIF/TIMP3/LGALS9/CD44/LRP1/PSCA/TRPV4/CCL21/ARRB2/PIN1/PTK2B/NOTCH1/CSF1R/AGER/FGF8/RAMP3/FLT4/PRKCZ/ATF3/NTRK1/SLC9A3R1/GAS6/PDGFRB/HAND2/DUSP3/CCL19/CD4/MARCO
GO:0040013	GO:0040013	negative regulation of locomotion	282	0.406052	1.75371	0.00177305	0.0150942	0.00886863	2786	tags=29%, list=13%, signal=25%	EMILIN1/TRIM28/APOD/ABR/JUP/ADAM15/ADGRG1/TGFB1/KRT16/IGFBP5/NBL1/NDRG4/FBLN1/PTPN23/ENG/GSTP1/APOE/PLXNB3/BCR/AKT1/PML/SLURP1/THY1/CALR/DUSP1/PLXNA3/CX3CL1/ALOX15B/EVL/SFRP1/CORO1B/CITED2/TIE1/KLF4/MMP28/RRAS/TRIM11/MIF/CSNK2B/SERPINE1/STAT3/LRP1/ARHGAP4/ILK/SERPINF1/CCL21/PTPRU/CDH1/PIN1/TRIB1/EPPK1/NOTCH1/HYAL2/HDAC5/NR2F2/ADIPOR1/TIMP1/HMOX1/DPYSL3/NF2/SMAD7/AFDN/ACVRL1/CYGB/DAG1/WNT4/MECP2/R…
GO:0031099	GO:0031099	regeneration	176	0.406754	1.66399	0.0018622	0.0150942	0.00886863	2569	tags=26%, list=12%, signal=23%	PTPRF/KREMEN1/APOD/TSPO/LAMB2/ADAM15/TGFB1/PKM/CCND1/GSTP1/MDK/GRN/CD81/THY1/MAPK8IP3/CD9/UCP2/NINJ1/BAK1/CAPN3/KLF4/GPX1/CDKN1A/CSNK2B/LRP1/IGF2R/PTPRU/ULK1/SULF2/EPPK1/RTN4RL1/SOX15/RTN4R/HMOX1/HAMP/PTPRS/SOX2/DAG1/PPARG/DHFR/APOA1/FPGS/GAS6/SGCA/TYMS/CDK4
GO:0007160	GO:0007160	cell-matrix adhesion	203	0.407002	1.69287	0.00187266	0.0150942	0.00886863	2216	tags=25%, list=11%, signal=23%	ITGB4/ZYX/EMILIN1/COL17A1/APOD/CAMSAP3/JUP/MINK1/ADAM15/PXN/TRIP6/COL5A3/MMP14/ACTN1/RHOD/THY1/ITGA3/BCAM/CX3CL1/SFRP1/NINJ1/LAMA5/TAOK2/ABL1/CD34/LDB1/SMAD3/SERPINE1/CD44/LRP1/DMTN/SDC4/ILK/VEGFA/CCL21/RAC1/FBLN5/PIP5K1A/PTK2B/ITGA7/MUC4/BCAS3/PLAU/NF2/ACVRL1/DAG1/ITGB2/THBS3/WNT4/PRKCZ/RHOA
GO:1902905	GO:1902905	positive regulation of supramolecular fiber organization	173	0.407249	1.6626	0.00187617	0.0150942	0.00886863	3847	tags=37%, list=18%, signal=30%	FLNA/PFN1/SORBS3/CDC42EP5/PXN/VASP/KATNB1/CSF3/APOE/ARPC4/MYO1C/CX3CL1/NUMA1/EVL/SFRP1/PYCARD/CORO1B/ABL1/ICAM1/ID1/GPX1/CFL1/SMAD3/CORO1A/SDC4/MAPT/DCTN1/FCHSD1/RHOC/STMN2/TRPV4/COLGALT1/CCL21/FES/HIP1R/FHOD1/RAC1/PTK2B/NF2/BAIAP2L1/WNT4/MECP2/RHOA/RAPGEF3/BIN1/APOA1/ARPC1B/ARL2/TPM1/CARMIL2/SCIN/LMOD1/WASL/ARPIN/CLU/CCL24/DLG1/HCK/LIMK1/TESK1/SH3PXD2B/PICK1/ARHGEF5/EPHA1
GO:0001649	GO:0001649	osteoblast differentiation	195	0.407961	1.69478	0.00185185	0.0150942	0.00886863	2509	tags=26%, list=12%, signal=23%	JUND/COL6A1/COL1A1/CEBPA/ALPL/IGFBP5/JUNB/TPM4/ALYREF/ATP6AP1/FZD1/TRPM4/TP63/FASN/AKT1/EPHA2/TCIRG1/SFRP1/TP53INP2/TMEM119/MEN1/PDLIM7/ID1/LRP5/ESRRA/BMP7/SMAD3/LGR4/PRKACA/RRBP1/ILK/MRC2/NPPC/CREB3L1/MYBBP1A/WNT7B/IL6R/NOTCH1/CTNNBIP1/SMO/FAM20C/CEBPD/PTH1R/SOX2/WNT4/DLX5/SFRP2/IGFBP3/MSX2/MEF2D/SNRNP200
GO:0043062	GO:0043062	extracellular structure organization	368	0.408243	1.79998	0.0017452	0.0150942	0.00886863	2749	tags=27%, list=13%, signal=24%	COL6A1/COMP/COL1A1/ITGB4/HSPG2/TPSAB1/COL6A2/EMILIN1/BSG/LOXL1/FSCN1/LAMB2/ADAM15/TGFB1/P4HB/COL18A1/LAMB3/PLTP/NFKB2/FBLN1/SH3PXD2A/ENG/SPINT1/AEBP1/RAMP2/COL5A3/MFAP2/CAPNS1/MMP14/APOE/ADAMTSL4/FBLN2/COL4A2/COL5A1/ITGA3/MFAP4/AGRN/DGAT1/B4GALT1/ABCA7/TNFRSF1A/LAMA5/ABL1/ELN/HTRA1/ICAM1/CD34/VWA1/FLOT1/BMP1/FURIN/ADAMTS2/BMP7/SMAD3/SERPINE1/CD44/LRP1/PRKACA/SDC4/COL7A1/COLGALT1/CDH1/SULF2/COL8A2…
GO:0061138	GO:0061138	morphogenesis of a branching epithelium	175	0.409047	1.67033	0.00187266	0.0150942	0.00886863	4093	tags=33%, list=20%, signal=26%	VANGL2/TGFB1/ENG/SPINT1/TP63/MMP14/MDK/SIX2/PML/EPHA2/SOCS3/ST14/SFRP1/PPP1CA/LAMA5/ABL1/NFATC4/BMP7/LGR4/RXRA/ILK/VEGFA/DCHS1/PLXND1/CTNNBIP1/SMO/FGF8/VDR/DAG1/RASIP1/WNT4/NOTCH4/SFRP2/MSX2/TBX3/LHX1/SRF/PLXNA1/SIX1/GLI2/GBX2/SIRT6/SRC/FOXC2/MYC/BMP2/NKX2-1/DLG1/SOX8/DLG5/TNC/WNT6/BMP4/PTCH1/PAX8/GLI3/SPINT2
GO:0050728	GO:0050728	negative regulation of inflammatory response	123	0.409433	1.59733	0.0056926	0.029065	0.0170772	2976	tags=31%, list=14%, signal=27%	APOD/KRT1/ABR/LDLR/GSTP1/MDK/METRNL/APOE/GRN/BCR/PRKCD/SOCS3/CX3CL1/PYCARD/TNFRSF1A/GPS2/KLF4/GPX1/SIRPA/NLRX1/SMAD3/SERPINF1/MVK/TYRO3/MAPK7/AGER/MIR205/PGLYRP1/FOXP3/FNDC4/PPARG/ABCD1/APOA1/TNFRSF1B/CHID1/SHARPIN/IL20RB/CXCL17
GO:0072593	GO:0072593	reactive oxygen species metabolic process	237	0.409441	1.72213	0.00190476	0.0150942	0.00886863	3205	tags=30%, list=15%, signal=26%	TFAP2A/TP53/TSPO/TGFB1/GPX3/GNAI2/DUOX1/SH3PXD2A/G6PD/POR/IFI6/GSTP1/DUOXA1/GBF1/BCR/AKT1/CD177/PRKCD/CRYAB/KHSRP/NDUFA13/ICAM1/EPHX2/CD34/KLF4/GPX1/EIF6/SIRPA/CDKN1A/BMP7/SMAD3/STAT3/CCS/VDAC1/DDAH2/MAPT/ND2/ASS1/NOS3/RAC1/FBLN5/PID1/PTK2B/ZNF205/SZT2/PINK1/MPV17/ITGB2/HSP90AB1/RHOA/DUOX2/NOXO1/TICAM1/ALOX12/ABCD1/SFTPD/DHFR/SESN2/ADGRB1/PDGFRB/TPO/FOXM1/SPHK2/NOS2/GRIN1/MAPK14/NOXA1/HDAC6/RIPK3…
GO:0010821	GO:0010821	regulation of mitochondrion organization	169	0.41176	1.67618	0.00189394	0.0150942	0.00886863	3311	tags=34%, list=16%, signal=29%	YWHAE/TP53/BCL2L1/TSPO/LMNA/CHCHD10/ATP13A2/TP63/BAP1/AKT1/TP73/CDC37/TSC2/SREBF2/BAX/VAT1/USP36/PYCARD/BAK1/SREBF1/CIDEB/TFDP1/GPX1/BOK/BAD/FIS1/MFN2/VDAC1/TMEM102/MAPT/HIP1R/ARRB2/INF2/UBE2J2/PID1/ZNF205/SMURF1/PINK1/YWHAB/PPIF/CLEC16A/PLAUR/NMT1/PAM16/HTRA2/NOL3/YWHAZ/HDAC6/STAT2/BIK/PRELID1/PPP3CC/PPP1R13B/CLU/GSK3A/MICALL2/MIEF2
GO:0031589	GO:0031589	cell-substrate adhesion	308	0.41257	1.79534	0.00178571	0.0150942	0.00886863	2739	tags=26%, list=13%, signal=23%	COL1A1/ITGB4/ZYX/FLNA/EMILIN1/SORBS3/COL17A1/APOD/CAMSAP3/ACTN4/JUP/MINK1/ADAM15/PXN/TRIP6/FBLN1/COL5A3/MMP14/ACTN1/MDK/RHOD/FAT2/EPHB3/THY1/RAC3/ITGA3/BCAM/CALR/TNFRSF12A/CX3CL1/SFRP1/MYADM/NINJ1/MEN1/LAMA5/TAOK2/ABL1/ID1/CD34/LDB1/SMAD3/SERPINE1/CORO1A/CD44/LRP1/DMTN/SDC4/ILK/VEGFA/CCL21/TYRO3/RAC1/FBLN5/PIP5K1A/PTK2B/NOTCH1/ITGA7/CCDC80/UNC13D/MUC4/BCAS3/PLAU/NF2/ACVRL1/DAG1/ITGB2/THBS3/WNT4/P…
GO:1905477	GO:1905477	positive regulation of protein localization to membrane	114	0.414771	1.60573	0.00757576	0.0337918	0.0198545	3836	tags=32%, list=18%, signal=27%	YWHAE/ERBB2/HRAS/TP53/TGFB1/EZR/TP63/RHOG/CD81/AKT1/TP73/ITGA3/EPHA2/MYO1C/TFDP1/AKT2/BAD/FIS1/LRP1/ARHGEF16/CHP1/YWHAB/RAMP3/ITGB2/NMT1/YWHAZ/CLIP3/PPP3CC/PPP1R13B/CACNB3/MIEF2/DLG1/STAC3/NKD2/TFDP2/E2F1/SSH1
GO:0061448	GO:0061448	connective tissue development	226	0.416299	1.74856	0.00187617	0.0150942	0.00886863	3243	tags=30%, list=16%, signal=26%	COMP/COL1A1/PITX1/FGFR3/CARM1/ECM1/TGFB1/RARG/CRIP1/SERPINH1/POR/TRPM4/MDK/RELA/ZNF219/SIX2/WNT5B/COL5A1/COL27A1/DYRK1B/ROR2/CD34/MAPK3/ADAMTS7/BMP1/LRP5/SLC39A13/ESRRA/BMP7/SMAD3/ZBTB16/CD44/HES5/RARA/TRPV4/SULF2/NPPC/WNT7B/IL6R/HYAL3/HYAL2/TIMP1/OSR1/ACVRL1/PTH1R/THBS3/LOXL2/SFRP2/MSX2/MEF2D/TYMS/EGR1/CDK4/PDGFRB/DGAT2/HAND2/SCIN/FBXW4/SRF/GLG1/MAPK14/DDRGK1/GLI2/SLC25A25/HYAL1/FOXC2/BMP2/CHADL
GO:0002576	GO:0002576	platelet degranulation	121	0.416862	1.62054	0.00575816	0.029065	0.0170772	2717	tags=25%, list=13%, signal=22%	VEGFB/FLNA/ACTN4/TAGLN2/WDR1/ECM1/TGFB1/LGALS3BP/GTPBP2/ISLR/ALDOA/ACTN1/STXBP2/CD9/TEX264/CFD/TIMP3/SERPINE1/DMTN/VEGFA/SERPING1/TIMP1/APLP2/TUBA4A/APOA1/GAS6/PCDH7/POTEKP/SYTL4/CHID1
GO:0030336	GO:0030336	negative regulation of cell migration	242	0.418269	1.76662	0.00190114	0.0150942	0.00886863	2786	tags=31%, list=13%, signal=27%	EMILIN1/APOD/ABR/JUP/ADAM15/ADGRG1/TGFB1/KRT16/IGFBP5/NBL1/NDRG4/PTPN23/ENG/GSTP1/APOE/PLXNB3/BCR/AKT1/SLURP1/THY1/CALR/DUSP1/CX3CL1/ALOX15B/EVL/SFRP1/CORO1B/CITED2/TIE1/KLF4/MMP28/RRAS/MIF/CSNK2B/SERPINE1/STAT3/LRP1/ARHGAP4/ILK/SERPINF1/CCL21/PTPRU/CDH1/TRIB1/EPPK1/NOTCH1/HYAL2/HDAC5/NR2F2/ADIPOR1/TIMP1/HMOX1/DPYSL3/NF2/SMAD7/AFDN/ACVRL1/CYGB/DAG1/WNT4/MECP2/RHOA/BST2/SFRP2/IDH2/IGFBP3/PPARG/SLC…
GO:2000146	GO:2000146	negative regulation of cell motility	256	0.418638	1.78449	0.00183824	0.0150942	0.00886863	2786	tags=30%, list=13%, signal=26%	EMILIN1/APOD/ABR/JUP/ADAM15/ADGRG1/TGFB1/KRT16/IGFBP5/NBL1/NDRG4/FBLN1/PTPN23/ENG/GSTP1/APOE/PLXNB3/BCR/AKT1/SLURP1/THY1/CALR/DUSP1/CX3CL1/ALOX15B/EVL/SFRP1/CORO1B/CITED2/TIE1/KLF4/MMP28/RRAS/MIF/CSNK2B/SERPINE1/STAT3/LRP1/ARHGAP4/ILK/SERPINF1/CCL21/PTPRU/CDH1/PIN1/TRIB1/EPPK1/NOTCH1/HYAL2/HDAC5/NR2F2/ADIPOR1/TIMP1/HMOX1/DPYSL3/NF2/SMAD7/AFDN/ACVRL1/CYGB/DAG1/WNT4/MECP2/RHOA/BST2/SFRP2/IDH2/IGFBP…
GO:0051271	GO:0051271	negative regulation of cellular component movement	271	0.419104	1.80118	0.00179856	0.0150942	0.00886863	2786	tags=30%, list=13%, signal=27%	EMILIN1/APOD/ACTN4/ABR/JUP/ADAM15/ADGRG1/TGFB1/KRT16/IGFBP5/NBL1/NDRG4/FBLN1/PTPN23/ENG/ACTN1/GSTP1/APOE/PLXNB3/BCR/AKT1/SLURP1/THY1/CALR/DUSP1/PLXNA3/CX3CL1/ALOX15B/CD9/EVL/SFRP1/CORO1B/CITED2/TIE1/KLF4/MMP28/RRAS/MIF/CSNK2B/SERPINE1/STAT3/LRP1/ARHGAP4/ILK/SERPINF1/CCL21/PTPRU/CDH1/PIN1/TRIB1/EPPK1/NOTCH1/HYAL2/HDAC5/NR2F2/ADIPOR1/TIMP1/HMOX1/DPYSL3/NF2/SMAD7/AFDN/ACVRL1/CYGB/DAG1/WNT4/MECP2/RHO…
GO:0010810	GO:0010810	regulation of cell-substrate adhesion	191	0.419611	1.73595	0.00187266	0.0150942	0.00886863	2675	tags=27%, list=13%, signal=23%	COL1A1/FLNA/APOD/CAMSAP3/ACTN4/JUP/MINK1/ADAM15/FBLN1/MMP14/MDK/RHOD/THY1/RAC3/ITGA3/CALR/CX3CL1/SFRP1/MYADM/NINJ1/MEN1/ABL1/LDB1/SMAD3/SERPINE1/LRP1/DMTN/SDC4/ILK/VEGFA/CCL21/RAC1/PTK2B/NOTCH1/CCDC80/UNC13D/BCAS3/PLAU/NF2/ACVRL1/DAG1/WNT4/PRKCZ/RHOA/ITGA5/NID1/APOA1/ARL2/RELL2/EDIL3/DUSP3
GO:0007369	GO:0007369	gastrulation	164	0.422864	1.71635	0.00190114	0.0150942	0.00886863	2924	tags=30%, list=14%, signal=26%	COL6A1/ITGB4/IL1RN/TP53/VANGL2/KDM6B/LAMB3/MMP14/SIX2/COL4A2/COL5A1/ITGA3/EPHA2/SFRP1/MYADM/ZBTB17/KLF4/LDB1/ARFRP1/EYA2/BMP7/SMAD3/DVL1/PRKACA/COL7A1/ARID1A/SOX7/MEGF8/MAPK7/MMP15/ITGA7/FGF8/ETS2/ETV2/NF2/OSR1/SOX2/DAG1/ITGB2/PAF1/EXOC4/SFRP2/ITGA5/APOA1/COL12A1/ATOH8/FOXC1/LHX1/TLX2/SRF
GO:0030198	GO:0030198	extracellular matrix organization	316	0.42342	1.84763	0.00175131	0.0150942	0.00886863	2749	tags=27%, list=13%, signal=24%	COL6A1/COMP/COL1A1/ITGB4/HSPG2/TPSAB1/COL6A2/EMILIN1/BSG/LOXL1/FSCN1/LAMB2/ADAM15/TGFB1/COL18A1/LAMB3/NFKB2/FBLN1/SH3PXD2A/ENG/SPINT1/AEBP1/RAMP2/COL5A3/MFAP2/CAPNS1/MMP14/ADAMTSL4/FBLN2/COL4A2/COL5A1/ITGA3/MFAP4/AGRN/B4GALT1/TNFRSF1A/LAMA5/ABL1/ELN/HTRA1/ICAM1/VWA1/FLOT1/BMP1/FURIN/ADAMTS2/SMAD3/SERPINE1/CD44/LRP1/COL7A1/COLGALT1/CDH1/SULF2/COL8A2/CREB3L1/FBLN5/MMP15/NOTCH1/EFEMP2/ITGA7/CCDC80/M…
GO:2000377	GO:2000377	regulation of reactive oxygen species metabolic process	169	0.424588	1.72841	0.00189394	0.0150942	0.00886863	3205	tags=31%, list=15%, signal=27%	TFAP2A/TP53/TSPO/TGFB1/GNAI2/G6PD/GSTP1/DUOXA1/BCR/AKT1/CD177/PRKCD/CRYAB/KHSRP/ICAM1/CD34/KLF4/EIF6/SIRPA/CDKN1A/BMP7/SMAD3/STAT3/VDAC1/DDAH2/MAPT/ASS1/RAC1/FBLN5/PID1/PTK2B/ZNF205/SZT2/PINK1/MPV17/ITGB2/HSP90AB1/RHOA/NOXO1/TICAM1/ABCD1/DHFR/ADGRB1/PDGFRB/FOXM1/SPHK2/GRIN1/MAPK14/NOXA1/HDAC6/RIPK3/COX2/CLU
GO:2001235	GO:2001235	positive regulation of apoptotic signaling pathway	161	0.425463	1.71683	0.00190114	0.0150942	0.00886863	3268	tags=35%, list=16%, signal=30%	YWHAE/TP53/BCL2L1/PPP2R1A/CHCHD10/TP63/TP73/PRKCD/PML/BAX/TNFRSF12A/TRAF7/SFRP1/PPP1CA/PYCARD/BAK1/RAD9A/CIDEB/TFDP1/RBCK1/NFATC4/BOK/BAD/NUPR1/TIMP3/SMAD3/FIS1/PEA15/LGALS9/HIP1R/FAF1/PRR7/ZNF205/HYAL2/PIAS4/TRAF2/PINK1/YWHAB/PPIF/ATF3/DEDD2/PLAUR/BCAP31/PAK2/LTBR/NMT1/SLC9A3R1/MAL/HTRA2/NACC2/YWHAZ/RIPK3/BIK/PPP3CC/PPP1R13B/GSK3A
GO:0021915	GO:0021915	neural tube development	151	0.432779	1.74355	0.00186916	0.0150942	0.00886863	4093	tags=40%, list=20%, signal=33%	PFN1/FKBP8/VANGL2/ZFP36L1/SSBP3/TGFB1/RARG/VASP/SPINT1/FZD1/TSC2/EPHA2/MED12/ARHGAP35/ST14/SOX4/SFRP1/ZNF358/ABL1/CFL1/BMP7/DEAF1/DVL1/PRKACA/HES5/SDC4/RARA/ARID1A/DCHS1/SMO/PTK7/FGF8/TEAD2/PLXNB2/COBL/PLOD3/PHGDH/SFRP2/AMBRA1/FUZ/SKI/KAT2A/GRHL3/GPR161/FZD2/GLI2/GBX2/FOXB1/DVL2/SEMA4C/MTHFR/SUFU/CHRD/BMP4/PTCH1/TULP3/HES1/ITPK1/PHACTR4/GLI3/SPINT2
GO:0016331	GO:0016331	morphogenesis of embryonic epithelium	145	0.435024	1.74652	0.00186567	0.0150942	0.00886863	4093	tags=40%, list=20%, signal=32%	TFAP2A/PFN1/VANGL2/TGFB1I1/TGFB1/RARG/VASP/SPINT1/FZD1/TP63/TSC2/MED12/ARHGAP35/ST14/SOX4/SFRP1/LAMA5/ABL1/JAG2/CFL1/BMP7/DEAF1/DVL1/PRKACA/HES5/SDC4/RARA/ARID1A/KDF1/IRX3/WNT7B/PTK7/FGF8/TEAD2/OSR1/PLXNB2/COBL/WNT4/SFRP2/FUZ/SKI/KAT2A/GRHL3/FZD2/SIX1/GLI2/DVL2/SEMA4C/MTHFR/SOX8/SUFU/WNT6/BMP4/PTCH1/TULP3/PAX8/PHACTR4/SPINT2
GO:0051216	GO:0051216	cartilage development	169	0.435864	1.77431	0.00189394	0.0150942	0.00886863	3243	tags=32%, list=16%, signal=27%	COMP/COL1A1/PITX1/FGFR3/CARM1/ECM1/TGFB1/RARG/SERPINH1/POR/MDK/RELA/ZNF219/SIX2/WNT5B/COL27A1/ROR2/MAPK3/ADAMTS7/BMP1/ESRRA/BMP7/SMAD3/ZBTB16/CD44/HES5/RARA/TRPV4/SULF2/NPPC/WNT7B/HYAL3/HYAL2/TIMP1/OSR1/ACVRL1/PTH1R/THBS3/LOXL2/SFRP2/MSX2/MEF2D/TYMS/HAND2/SCIN/FBXW4/SRF/GLG1/MAPK14/DDRGK1/GLI2/HYAL1/BMP2/CHADL
GO:0007266	GO:0007266	Rho protein signal transduction	151	0.437763	1.76363	0.00186916	0.0150942	0.00886863	3933	tags=37%, list=19%, signal=30%	EPS8L2/ARHGDIA/VANGL2/ABR/ADGRG1/RTKN/EPS8L1/RHOG/APOE/BCR/ITGA3/ARHGAP35/ARHGEF11/MYO9B/NGFR/ABL1/KCTD13/FLOT1/CFL1/PLEKHG5/PLEKHG6/FGD1/ARHGAP1/ARHGAP4/ARHGEF19/ARHGEF16/PLEKHG2/RAC1/CNKSR1/RTN4R/ADRA2A/OBSCN/RASIP1/RHOA/NGEF/VAV2/APOA1/FGD5/PDGFRB/FGD3/TNFAIP1/ARHGEF2/PLEKHG4B/RHOB/PLEKHG3/SOS2/ARHGEF25/LIMK1/TIAM1/BCL6/ARHGEF5/ARHGEF17/NTN1/KANK2/AKAP13/APOC3
GO:0022612	GO:0022612	gland morphogenesis	112	0.439951	1.69389	0.00192308	0.0150942	0.00886863	4850	tags=40%, list=23%, signal=31%	TGFB1/RARG/CRIP1/IGFBP5/STAT6/TP63/MDK/PML/BAX/EPHA2/SFRP1/RPS6KA1/LAMA5/TBX2/BMP7/RXRA/SULF2/CSF1R/PLXND1/CAPN1/FGF8/VDR/LIMS2/DAG1/WNT4/MSX2/SLC9A3R1/TBX3/PLXNA1/GLI2/SRC/NFIB/NTN1/TNC/BMP4/CEBPB/PTCH1/GLI3/HPN/TGFBR2/BTRC/SCRIB/CSF1/PDGFA/PHB2
GO:0061572	GO:0061572	actin filament bundle organization	129	0.444331	1.75416	0.00184162	0.0150942	0.00886863	3891	tags=40%, list=19%, signal=32%	ZYX/FLNA/PFN1/SORBS3/ACTN4/FSCN1/PXN/BAIAP2/EZR/ACTN1/RHOD/CX3CL1/WASF2/EVL/SFRP1/CORO1B/ABL1/ELN/ID1/KCTD13/SMAD3/ASAP3/DMTN/SDC4/RHOC/FHOD1/RAC1/PTK2B/DPYSL3/NF2/WNT4/RHOA/ADD1/ARAP1/RAPGEF3/APOA1/TPM1/TNFAIP1/SHANK3/SRF/ESPN/SHANK1/SRC/LIMK1/TESK1/INPP5K/CORO2B/SH3PXD2B/ARHGEF5/EPHA1/MARCKS
GO:0001704	GO:0001704	formation of primary germ layer	106	0.446912	1.71534	0.0018797	0.0150942	0.00886863	2924	tags=33%, list=14%, signal=29%	COL6A1/ITGB4/KDM6B/LAMB3/MMP14/SIX2/COL4A2/COL5A1/ITGA3/EPHA2/KLF4/EYA2/BMP7/SMAD3/PRKACA/COL7A1/ARID1A/SOX7/MMP15/ITGA7/ETS2/ETV2/NF2/SOX2/ITGB2/PAF1/EXOC4/SFRP2/ITGA5/COL12A1/ATOH8/FOXC1/LHX1/TLX2/SRF
GO:0016125	GO:0016125	sterol metabolic process	143	0.448097	1.79182	0.00185874	0.0150942	0.00886863	3037	tags=29%, list=15%, signal=25%	LSS/CEBPA/LDLR/TM7SF2/SULT2B1/CYB5R3/G6PD/POR/FDXR/APOE/FASN/SCAP/SREBF2/NFYC/ACADVL/STARD3/MVD/SREBF1/SCD/ACLY/EPHX2/CYP11A1/DHCR24/RXRA/MVK/PMVK/DGKQ/LCAT/OSBPL5/SP1/SNX17/CEL/NPC2/SMPD1/ERLIN2/DHCR7/APOA1/DGAT2/SQLE/HDLBP/APOBR/GBA2
GO:0045598	GO:0045598	regulation of fat cell differentiation	115	0.449236	1.74292	0.00187617	0.0150942	0.00886863	4179	tags=36%, list=20%, signal=29%	ZFP36L2/CARM1/ZNF385A/ZFP36L1/CEBPA/TGFB1I1/TGFB1/ZBTB7C/TRPM4/METRNL/AKT1/ZBTB7B/WNT5B/SFRP1/GPS2/ZFP36/LRP5/SMAD3/ZBTB16/TRPV4/SFRP2/PPARG/MSX2/ADIRF/ZFPM1/TRIB2/MMP11/JDP2/MAPK14/HDAC6/BMP2/RARRES2/DLK2/SH3PXD2B/DKKL1/E2F1/CEBPB/HES1/CCDC85B/GPER1/PPARD
GO:0008637	GO:0008637	apoptotic mitochondrial changes	109	0.449482	1.73115	0.0018797	0.0150942	0.00886863	3268	tags=39%, list=16%, signal=33%	YWHAE/TP53/BCL2L1/LMNA/CHCHD10/IFI6/TP63/AKT1/TP73/BAX/PYCARD/BAK1/CIDEB/TFDP1/GPX1/BOK/BAD/EYA2/FIS1/TMEM102/HIP1R/ARRB2/ZNF205/TIMM50/PINK1/YWHAB/PPIF/PLAUR/RHOT2/NMT1/PAM16/PPP2CB/CCK/NOL3/YWHAZ/BIK/PRELID1/JUN/PPP3CC/PPP1R13B/CLU/GSK3A
GO:0051017	GO:0051017	actin filament bundle assembly	128	0.451236	1.7775	0.00185185	0.0150942	0.00886863	3891	tags=40%, list=19%, signal=33%	ZYX/FLNA/PFN1/SORBS3/ACTN4/FSCN1/PXN/BAIAP2/EZR/ACTN1/RHOD/CX3CL1/WASF2/EVL/SFRP1/CORO1B/ABL1/ELN/ID1/KCTD13/SMAD3/ASAP3/DMTN/SDC4/RHOC/FHOD1/RAC1/PTK2B/DPYSL3/NF2/WNT4/RHOA/ADD1/ARAP1/RAPGEF3/APOA1/TPM1/TNFAIP1/SHANK3/SRF/ESPN/SHANK1/SRC/LIMK1/TESK1/INPP5K/CORO2B/SH3PXD2B/ARHGEF5/EPHA1/MARCKS
GO:0010001	GO:0010001	glial cell differentiation	203	0.45126	1.87696	0.00187266	0.0150942	0.00886863	4702	tags=40%, list=23%, signal=32%	ERBB2/WDR1/LAMB2/LDLR/TGFB1/GPC1/SPINT1/GSTP1/MDK/NAB2/GRN/AKT1/RELA/TP73/MED12/CD9/SOX4/ROR2/C1QA/ABL1/MAPK3/BACE2/POU3F1/AKT2/BOK/STAT3/LRP1/HES5/MAPT/ILK/NDRG1/NOTCH1/SMO/AGER/MXRA8/METRN/SOX2/DAG1/LGI4/RHOA/PHGDH/TMEM98/BIN1/PPARG/TNFRSF1B/PRPF19/MYRF/SKI/HDAC10/IL34/CSK/TNFRSF21/BMP2/CLU/GSX2/DAAM2/GPR157/NKX2-1/DNER/ERBB3/NFIB/SOX8/HDAC11/MAPK1/PICK1/NTRK2/DTX1/HES1/GLI3/ERCC2/DLL1/SIRT2/PS…
GO:0035023	GO:0035023	regulation of Rho protein signal transduction	119	0.452388	1.75688	0.00189753	0.0150942	0.00886863	3933	tags=36%, list=19%, signal=29%	EPS8L2/ARHGDIA/ABR/ADGRG1/EPS8L1/APOE/BCR/ITGA3/ARHGAP35/ARHGEF11/MYO9B/ABL1/KCTD13/FLOT1/PLEKHG5/PLEKHG6/FGD1/ARHGEF19/ARHGEF16/PLEKHG2/RAC1/RTN4R/OBSCN/RASIP1/NGEF/VAV2/APOA1/FGD5/PDGFRB/FGD3/TNFAIP1/ARHGEF2/PLEKHG4B/PLEKHG3/SOS2/ARHGEF25/TIAM1/BCL6/ARHGEF5/ARHGEF17/KANK2/AKAP13/APOC3
GO:0030879	GO:0030879	mammary gland development	131	0.456712	1.80854	0.00185529	0.0150942	0.00886863	4542	tags=41%, list=22%, signal=32%	IRF6/TGFB1/IGFBP5/ORAI1/STAT6/APRT/CCND1/FASN/AKT1/ZBTB7B/PML/BAX/EPHA2/ARHGAP35/TBX2/GPX1/AKT2/DEAF1/VEGFA/ZNF703/WNT7B/CSF1R/SMO/PYGO2/CAPN1/NCOR2/VDR/WNT4/NOTCH4/MSX2/TBX3/USF2/GLI2/HOXD9/SOCS2/SRC/FOXB1/COX2/CAD/DHODH/MGMT/MAPK1/NTN1/BMP4/CEBPB/PTCH1/HK2/GLI3/NEURL1/TGFBR2/LATS1/MSX1/BTRC/SCRIB
GO:0008360	GO:0008360	regulation of cell shape	117	0.457555	1.77534	0.00189036	0.0150942	0.00886863	2654	tags=32%, list=13%, signal=29%	CDC42EP1/MYH14/MARK2/WDR1/CDC42EP5/BAIAP2/EZR/PLXNB1/ALDOA/FBLIM1/ARHGAP35/CDC42EP4/TAOK2/ICAM1/MYH9/PLEKHO1/FGD1/CORO1A/FMNL1/DMTN/BAMBI/VEGFA/FES/DIAPH1/PALMD/PARVB/PTK2B/CSF1R/PALM/ITGA7/PLXNB2/DAG1/ITGB2/ARAP1/SLC9A3R1/FGD5/TPM1/FGD3
GO:1902652	GO:1902652	secondary alcohol metabolic process	137	0.461688	1.82931	0.0018797	0.0150942	0.00886863	3037	tags=31%, list=15%, signal=26%	LSS/CEBPA/LDLR/TM7SF2/SULT2B1/CYB5R3/G6PD/POR/FDXR/APOE/FASN/SCAP/SREBF2/NFYC/ACADVL/STARD3/MVD/SREBF1/SCD/ACLY/EPHX2/CYP11A1/DHCR24/RXRA/MVK/PMVK/DGKQ/LCAT/OSBPL5/SP1/SNX17/CEL/NPC2/SMPD1/ERLIN2/DHCR7/APOA1/DGAT2/SQLE/HDLBP/APOBR/GBA2
GO:0008544	GO:0008544	epidermis development	356	0.46406	2.04547	0.00172712	0.0150942	0.00886863	1954	tags=22%, list=9%, signal=21%	KRT3/PKP3/LOR/SOX18/KLK13/FOSL2/EVPL/COL17A1/AQP3/KLK14/PRSS8/KRT2/KRT1/IRF6/PKP1/VANGL2/ZFP36L1/CALML5/CDSN/JUP/KRT16/IGFBP5/LAMB3/FLOT2/FOXN1/SULT2B1/TP63/CAPNS1/TMEM79/NAB2/RELA/CRABP2/CNFN/KRT8/EPHA2/APCDD1/TGM3/KRT15/KRT78/NUMA1/GJB5/ST14/ALOX15B/AGPAT2/TRIM16/DSC1/LAMA5/PKP4/ZFP36/CDH3/TFDP1/POU3F1/JAG2/KLF4/KRT76/LDB1/KEAP1/FURIN/KRT31/LGR4/HES5/PLOD1/COL7A1/TGM5/KDF1/KAZN/WNT10A/TGM1/KLK1…
GO:0045216	GO:0045216	cell-cell junction organization	123	0.466561	1.82021	0.00189753	0.0150942	0.00886863	3786	tags=35%, list=18%, signal=29%	PKP3/LSR/CAMSAP3/ACTN4/FSCN1/WDR1/JUP/TGFB1/RAMP2/CD177/EPHA2/NECTIN1/MYO1C/CD9/PKP4/ACE/PARD6G/SMAD3/PRKACA/CLDN5/RHOC/TRPV4/CSF1R/NF2/LIMS2/AFDN/RHOA/F11R/ARL2/PARD6A/SRF/WHRN/IKBKB/KIFC3/SDK2/MICALL2/DLG1/CDH5/SDK1/HDAC7/DLG5/CTNNA1/CLDN3
GO:0008203	GO:0008203	cholesterol metabolic process	133	0.466733	1.84395	0.0018797	0.0150942	0.00886863	3037	tags=32%, list=15%, signal=27%	LSS/CEBPA/LDLR/TM7SF2/SULT2B1/CYB5R3/G6PD/POR/FDXR/APOE/FASN/SCAP/SREBF2/NFYC/ACADVL/STARD3/MVD/SREBF1/SCD/ACLY/EPHX2/CYP11A1/DHCR24/RXRA/MVK/PMVK/DGKQ/LCAT/OSBPL5/SP1/SNX17/CEL/NPC2/SMPD1/ERLIN2/DHCR7/APOA1/DGAT2/SQLE/HDLBP/APOBR/GBA2
GO:0009913	GO:0009913	epidermal cell differentiation	252	0.474862	2.02069	0.00184843	0.0150942	0.00886863	2038	tags=23%, list=10%, signal=21%	KRT3/PKP3/LOR/KLK13/FOSL2/EVPL/AQP3/KLK14/PRSS8/KRT2/KRT1/IRF6/PKP1/ZFP36L1/CDSN/JUP/KRT16/FOXN1/SULT2B1/TP63/CAPNS1/TMEM79/CNFN/KRT8/EPHA2/TGM3/KRT15/KRT78/NUMA1/ST14/ALOX15B/TRIM16/DSC1/PKP4/ZFP36/CDH3/POU3F1/JAG2/KLF4/KRT76/KEAP1/FURIN/KRT31/HES5/TGM5/KDF1/KAZN/TGM1/KLK12/PIP5K1A/KRT18/FLNB/KLK5/CAPN1/KRT33A/IVL/VDR/KRT5
GO:0021782	GO:0021782	glial cell development	103	0.482856	1.84061	0.00192678	0.0150942	0.00886863	4702	tags=42%, list=23%, signal=32%	LAMB2/LDLR/TGFB1/GSTP1/MDK/GRN/AKT1/MED12/CD9/SOX4/ROR2/C1QA/BACE2/POU3F1/AKT2/LRP1/HES5/MAPT/ILK/NDRG1/SMO/AGER/MXRA8/DAG1/LGI4/PHGDH/MYRF/SKI/HDAC10/CLU/HDAC11/PICK1/NTRK2/ERCC2/DLL1/SIRT2/PSEN1/MAG/TENM4/B4GALT5/NRROS/NKX6-2/ARHGEF10
GO:0034330	GO:0034330	cell junction organization	269	0.486411	2.08847	0.00180505	0.0150942	0.00886863	2413	tags=28%, list=12%, signal=25%	PLEC/PKP3/ITGB4/FLNA/COL17A1/LSR/APOD/CAMSAP3/ACTN4/FSCN1/WDR1/JUP/TGFB1/VASP/LAMB3/CD151/TRIP6/PTPN23/RAMP2/MMP14/NECTIN4/NECTIN2/ACTN1/RHOD/FBLIM1/CD177/THY1/PIP5K1C/EPHA2/NECTIN1/MYO1C/CD9/SFRP1/LAMA5/TAOK2/ABL1/PKP4/CDH3/ACE/LDB1/FLOT1/PARD6G/RAPGEF1/SMAD3/LRP1/PRKACA/DMTN/CLDN5/SDC4/ILK/RHOC/TRPV4/VEGFA/CDH1/SH3BP1/RAC1/ZNF703/PIP5K1A/PTK2B/TNS1/CSF1R/PVR/BCAS3/NF2/LIMS2/SMAD7/AFDN/KRT5/ACVR…
GO:0034332	GO:0034332	adherens junction organization	132	0.486955	1.9277	0.00186567	0.0150942	0.00886863	2309	tags=29%, list=11%, signal=26%	APOD/CAMSAP3/JUP/TRIP6/PTPN23/RAMP2/MMP14/NECTIN4/NECTIN2/ACTN1/RHOD/THY1/PIP5K1C/NECTIN1/SFRP1/LAMA5/TAOK2/ABL1/CDH3/LDB1/SMAD3/LRP1/DMTN/SDC4/VEGFA/CDH1/RAC1/ZNF703/PIP5K1A/PTK2B/PVR/BCAS3/SMAD7/AFDN/ACVRL1/WNT4/RHOA/ADD1
GO:0043588	GO:0043588	skin development	317	0.491407	2.14354	0.00176367	0.0150942	0.00886863	2038	tags=25%, list=10%, signal=23%	KRT3/COMP/PKP3/COL1A1/ITGB4/LOR/SOX18/KLK13/FOSL2/EVPL/AQP3/KLK14/PRSS8/KRT2/KRT1/IRF6/PKP1/VANGL2/ZFP36L1/CDSN/JUP/KRT16/IGFBP5/ALOX12B/RYR1/FOXN1/COL5A3/TP63/CAPNS1/TMEM79/SLC27A4/RELA/GJB3/CNFN/KRT8/COL5A1/ITGA3/EPHA2/APCDD1/TGM3/KRT15/KRT78/NUMA1/ST14/ALOX15B/TRIM16/DSC1/LAMA5/PKP4/ZFP36/CDH3/POU3F1/KRT76/LDB1/FURIN/ADAMTS2/KRT31/LGR4/DHCR24/TGM5/KDF1/KAZN/WNT10A/TGM1/DACT2/KLK12/PIP5K1A/TNFR…
GO:0042476	GO:0042476	odontogenesis	122	0.49629	1.93304	0.0019084	0.0150942	0.00886863	3315	tags=33%, list=16%, signal=28%	TFAP2A/COL1A1/ITGB4/NFIC/DLX3/AQP3/BSG/ALPL/TGFB1/TP63/BAX/TCIRG1/NECTIN1/TBX1/LAMA5/HTRA1/ROGDI/CD34/JAG2/BMP7/SERPINE1/STIM1/WNT10A/ANKRD11/SMO/FGF8/NF2/FAM20C/OSR1/AQP1/RHOA/MSX2/FOXC1/HAND2/AQP5/GLI2/SRC/BMP2/SDC1/CEMP1
GO:0034329	GO:0034329	cell junction assembly	209	0.499593	2.07653	0.00189394	0.0150942	0.00886863	2413	tags=30%, list=12%, signal=26%	PLEC/PKP3/ITGB4/FLNA/COL17A1/LSR/APOD/CAMSAP3/ACTN4/FSCN1/WDR1/JUP/VASP/LAMB3/CD151/TRIP6/RAMP2/MMP14/ACTN1/RHOD/FBLIM1/THY1/PIP5K1C/EPHA2/MYO1C/CD9/SFRP1/LAMA5/TAOK2/ABL1/PKP4/ACE/LDB1/FLOT1/PARD6G/RAPGEF1/SMAD3/LRP1/PRKACA/DMTN/CLDN5/SDC4/ILK/RHOC/TRPV4/VEGFA/SH3BP1/RAC1/ZNF703/PIP5K1A/PTK2B/TNS1/BCAS3/LIMS2/SMAD7/AFDN/KRT5/ACVRL1/WNT4/RHOA/F11R/ITGA5
GO:0030216	GO:0030216	keratinocyte differentiation	207	0.51178	2.13363	0.00186567	0.0150942	0.00886863	2038	tags=26%, list=10%, signal=23%	KRT3/PKP3/LOR/KLK13/FOSL2/EVPL/AQP3/KLK14/PRSS8/KRT2/KRT1/IRF6/PKP1/ZFP36L1/CDSN/JUP/KRT16/FOXN1/TP63/CAPNS1/TMEM79/CNFN/KRT8/EPHA2/TGM3/KRT15/KRT78/NUMA1/ST14/ALOX15B/TRIM16/DSC1/PKP4/ZFP36/CDH3/POU3F1/KRT76/FURIN/KRT31/TGM5/KDF1/KAZN/TGM1/KLK12/PIP5K1A/KRT18/FLNB/KLK5/CAPN1/KRT33A/IVL/VDR/KRT5
GO:0031424	GO:0031424	keratinization	135	0.601583	2.38197	0.0018797	0.0150942	0.00886863	2038	tags=27%, list=10%, signal=25%	KRT3/PKP3/LOR/KLK13/EVPL/KLK14/PRSS8/KRT2/KRT1/PKP1/CDSN/JUP/KRT16/CAPNS1/TMEM79/CNFN/KRT8/TGM3/KRT15/KRT78/ST14/DSC1/PKP4/CDH3/KRT76/FURIN/KRT31/TGM5/KAZN/TGM1/KLK12/KRT18/KLK5/CAPN1/KRT33A/IVL/KRT5
